# Supplementary material
Source: HighWire-hosted journal article supplement (https://www.cancerbiomed.org/content/17/3/726)
Supplement: media-1 [file media-1.pdf]

## Supplementary materials

**Table S1** Marker genes for each cell subpopulation

| Gene_marker | myAUC | Avg_diff    | Power | Avg_logFC   | Pct.1 | Pct.2 | P_val_adj | Cluster |
|-------------|-------|-------------|-------|-------------|-------|-------|-----------|---------|
| GZMK        | 0.841 | 1.663182738 | 0.682 | 1.663182738 | 0.796 | 0.211 | NA        | 0       |
| CCL5        | 0.802 | 0.792291655 | 0.604 | 0.792291655 | 0.997 | 0.816 | NA        | 0       |
| CMC1        | 0.744 | 0.972272686 | 0.488 | 0.972272686 | 0.78  | 0.394 | NA        | 0       |
| LYAR        | 0.711 | 0.783510565 | 0.422 | 0.783510565 | 0.655 | 0.282 | NA        | 0       |
| CST7        | 0.702 | 0.477310958 | 0.404 | 0.477310958 | 0.91  | 0.597 | NA        | 0       |
| GZMH        | 0.916 | 1.510234259 | 0.832 | 1.510234259 | 0.969 | 0.444 | NA        | 1       |
| NKG7        | 0.877 | 1.05303263  | 0.754 | 1.05303263  | 0.999 | 0.785 | NA        | 1       |
| FGFBP2      | 0.827 | 1.485499676 | 0.654 | 1.485499676 | 0.765 | 0.187 | NA        | 1       |
| B2M         | 0.815 | 0.303392763 | 0.63  | 0.303392763 | 1     | 1     | NA        | 1       |
| GZMB        | 0.797 | 1.285614678 | 0.594 | 1.285614678 | 0.727 | 0.207 | NA        | 1       |
| CST7        | 0.77  | 0.710949366 | 0.54  | 0.710949366 | 0.951 | 0.617 | NA        | 1       |
| CCL5        | 0.757 | 0.623697673 | 0.514 | 0.623697673 | 0.998 | 0.835 | NA        | 1       |
| GZMA        | 0.756 | 0.736590732 | 0.512 | 0.736590732 | 0.915 | 0.553 | NA        | 1       |
| SH3BGRL3    | 0.753 | 0.544690885 | 0.506 | 0.544690885 | 0.991 | 0.902 | NA        | 1       |
| KLRD1       | 0.751 | 0.903127928 | 0.502 | 0.903127928 | 0.774 | 0.36  | NA        | 1       |
| S100A4      | 0.75  | 0.602483617 | 0.5   | 0.602483617 | 0.984 | 0.841 | NA        | 1       |
| PRF1        | 0.737 | 0.89105827  | 0.474 | 0.89105827  | 0.693 | 0.296 | NA        | 1       |
| ACTB        | 0.737 | 0.454706549 | 0.474 | 0.454706549 | 1     | 1     | NA        | 1       |
| CTSW        | 0.736 | 0.675718729 | 0.472 | 0.675718729 | 0.862 | 0.529 | NA        | 1       |
| CD3D        | 0.723 | 0.515111944 | 0.446 | 0.515111944 | 0.973 | 0.787 | NA        | 1       |
| IL32        | 0.708 | 0.44979189  | 0.416 | 0.44979189  | 0.992 | 0.822 | NA        | 1       |
| HCST        | 0.705 | 0.510270528 | 0.41  | 0.510270528 | 0.924 | 0.777 | NA        | 1       |
| HLA-C       | 0.705 | 0.316764661 | 0.41  | 0.316764661 | 1     | 0.998 | NA        | 1       |
| LTB         | 0.846 | 1.262633582 | 0.692 | 1.262633582 | 0.926 | 0.474 | NA        | 2       |
| EEF1A1      | 0.797 | 0.346447159 | 0.594 | 0.346447159 | 1     | 1     | NA        | 2       |
| RPL10       | 0.792 | 0.346185404 | 0.584 | 0.346185404 | 1     | 1     | NA        | 2       |
| RPLP1       | 0.787 | 0.400891514 | 0.574 | 0.400891514 | 1     | 1     | NA        | 2       |
| RPL13       | 0.785 | 0.319839963 | 0.57  | 0.319839963 | 1     | 1     | NA        | 2       |

Table S1 Continued

| Gene_marker | myAUC | Avg_diff    | Power | Avg_logFC   | Pct.1 | Pct.2 | P_val_adj | Cluster |
|-------------|-------|-------------|-------|-------------|-------|-------|-----------|---------|
| RPL32       | 0.776 | 0.33152658  | 0.552 | 0.33152658  | 1     | 1     | NA        | 2       |
| RPS25       | 0.773 | 0.386838669 | 0.546 | 0.386838669 | 1     | 0.998 | NA        | 2       |
| RPL34       | 0.768 | 0.357749148 | 0.536 | 0.357749148 | 1     | 1     | NA        | 2       |
| RPS6        | 0.766 | 0.32181637  | 0.532 | 0.32181637  | 1     | 1     | NA        | 2       |
| RPL21       | 0.757 | 0.299862331 | 0.514 | 0.299862331 | 1     | 1     | NA        | 2       |
| IL7R        | 0.754 | 1.01777479  | 0.508 | 1.01777479  | 0.733 | 0.281 | NA        | 2       |
| RPS8        | 0.753 | 0.339865853 | 0.506 | 0.339865853 | 1     | 0.999 | NA        | 2       |
| RPL36       | 0.746 | 0.320563065 | 0.492 | 0.320563065 | 1     | 1     | NA        | 2       |
| RPS18       | 0.746 | 0.28150499  | 0.492 | 0.28150499  | 1     | 1     | NA        | 2       |
| LDHB        | 0.744 | 0.813717458 | 0.488 | 0.813717458 | 0.832 | 0.53  | NA        | 2       |
| TPT1        | 0.744 | 0.4321877   | 0.488 | 0.4321877   | 0.996 | 0.977 | NA        | 2       |
| RPS27A      | 0.743 | 0.299561708 | 0.486 | 0.299561708 | 1     | 1     | NA        | 2       |
| FXYD5       | 0.73  | 0.7250378   | 0.46  | 0.7250378   | 0.825 | 0.555 | NA        | 2       |
| RPS3A       | 0.729 | 0.304044778 | 0.458 | 0.304044778 | 1     | 1     | NA        | 2       |
| RPL18A      | 0.728 | 0.277247751 | 0.456 | 0.277247751 | 1     | 1     | NA        | 2       |
| RPL39       | 0.727 | 0.27774111  | 0.454 | 0.27774111  | 1     | 1     | NA        | 2       |
| RPL11       | 0.724 | 0.259302292 | 0.448 | 0.259302292 | 1     | 1     | NA        | 2       |
| RPL36A      | 0.722 | 0.374102656 | 0.444 | 0.374102656 | 0.999 | 0.986 | NA        | 2       |
| RPS12       | 0.722 | 0.286011451 | 0.444 | 0.286011451 | 1     | 1     | NA        | 2       |
| RPL9        | 0.714 | 0.321438143 | 0.428 | 0.321438143 | 1     | 0.996 | NA        | 2       |
| RPL12       | 0.708 | 0.275941409 | 0.416 | 0.275941409 | 0.999 | 0.999 | NA        | 2       |
| RPL35A      | 0.705 | 0.255497185 | 0.41  | 0.255497185 | 1     | 1     | NA        | 2       |
| RPS13       | 0.704 | 0.302885047 | 0.408 | 0.302885047 | 0.999 | 0.997 | NA        | 2       |
| RPL31       | 0.703 | 0.272156715 | 0.406 | 0.272156715 | 1     | 0.999 | NA        | 2       |
| IGLC2       | 0.985 | 1.568590115 | 0.97  | 1.568590115 | 1     | 0.939 | NA        | 3       |
| IGLC3       | 0.981 | 1.661713956 | 0.962 | 1.661713956 | 0.996 | 0.412 | NA        | 3       |
| CD74        | 0.958 | 1.326480013 | 0.916 | 1.326480013 | 1     | 0.928 | NA        | 3       |
| CD79A       | 0.954 | 2.108262151 | 0.908 | 2.108262151 | 0.956 | 0.164 | NA        | 3       |
| MS4A1       | 0.953 | 2.241975953 | 0.906 | 2.241975953 | 0.951 | 0.144 | NA        | 3       |
| CD79B       | 0.948 | 1.996487639 | 0.896 | 1.996487639 | 0.953 | 0.215 | NA        | 3       |

Table S1 Continued

| Gene_marker   | myAUC | Avg_diff    | Power | Avg_logFC   | Pct.1 | Pct.2 | P_val_adj | Cluster |
|---------------|-------|-------------|-------|-------------|-------|-------|-----------|---------|
| HLA-DRA       | 0.942 | 1.679595904 | 0.884 | 1.679595904 | 0.998 | 0.558 | NA        | 3       |
| IGLC7         | 0.932 | 2.212569393 | 0.864 | 2.212569393 | 0.909 | 0.122 | NA        | 3       |
| IGHM          | 0.925 | 1.031200992 | 0.85  | 1.031200992 | 0.951 | 0.378 | NA        | 3       |
| IGLC6         | 0.922 | 2.374780226 | 0.844 | 2.374780226 | 0.88  | 0.066 | NA        | 3       |
| CCND1         | 0.914 | 2.014724192 | 0.828 | 2.014724192 | 0.874 | 0.101 | NA        | 3       |
| CD69          | 0.908 | 1.595866207 | 0.816 | 1.595866207 | 0.958 | 0.55  | NA        | 3       |
| VPREB3        | 0.903 | 1.935116145 | 0.806 | 1.935116145 | 0.852 | 0.09  | NA        | 3       |
| BTG2          | 0.893 | 1.72931512  | 0.786 | 1.72931512  | 0.882 | 0.227 | NA        | 3       |
| H3F3B         | 0.87  | 0.978617323 | 0.74  | 0.978617323 | 0.991 | 0.953 | NA        | 3       |
| EGR1          | 0.869 | 1.78657996  | 0.738 | 1.78657996  | 0.796 | 0.109 | NA        | 3       |
| IER2          | 0.869 | 1.481617247 | 0.738 | 1.481617247 | 0.925 | 0.522 | NA        | 3       |
| SMIM14        | 0.847 | 1.644623051 | 0.694 | 1.644623051 | 0.749 | 0.097 | NA        | 3       |
| CD37          | 0.841 | 0.974961817 | 0.682 | 0.974961817 | 0.942 | 0.696 | NA        | 3       |
| MT-ND4        | 0.839 | 0.639351731 | 0.678 | 0.639351731 | 0.998 | 0.984 | NA        | 3       |
| RPS11         | 0.833 | 0.596069729 | 0.666 | 0.596069729 | 0.995 | 0.981 | NA        | 3       |
| MT-ND3        | 0.825 | 0.626965758 | 0.65  | 0.626965758 | 1     | 0.978 | NA        | 3       |
| KLF6          | 0.82  | 1.060020331 | 0.64  | 1.060020331 | 0.922 | 0.646 | NA        | 3       |
| JUN           | 0.813 | 1.07909617  | 0.626 | 1.07909617  | 0.951 | 0.731 | NA        | 3       |
| CD24          | 0.802 | 1.474685646 | 0.604 | 1.474685646 | 0.638 | 0.049 | NA        | 3       |
| ZFP36L1       | 0.802 | 1.200476064 | 0.604 | 1.200476064 | 0.821 | 0.363 | NA        | 3       |
| MARCKSL1      | 0.777 | 1.185481393 | 0.554 | 1.185481393 | 0.672 | 0.169 | NA        | 3       |
| TNFRSF13C     | 0.768 | 1.307013475 | 0.536 | 1.307013475 | 0.579 | 0.063 | NA        | 3       |
| RPS5          | 0.766 | 0.443319731 | 0.532 | 0.443319731 | 0.996 | 0.985 | NA        | 3       |
| FOS           | 0.763 | 1.154297491 | 0.526 | 1.154297491 | 0.787 | 0.428 | NA        | 3       |
| DUSP2         | 0.76  | 1.174507654 | 0.52  | 1.174507654 | 0.812 | 0.528 | NA        | 3       |
| CH17-373J23.1 | 0.753 | 1.250636827 | 0.506 | 1.250636827 | 0.645 | 0.188 | NA        | 3       |
| MALAT1        | 0.753 | 0.334287    | 0.506 | 0.334287    | 1     | 1     | NA        | 3       |
| RPS23         | 0.75  | 0.343238572 | 0.5   | 0.343238572 | 1     | 1     | NA        | 3       |
| HLA-DMA       | 0.748 | 1.018449331 | 0.496 | 1.018449331 | 0.683 | 0.243 | NA        | 3       |
| CD9           | 0.74  | 1.245715836 | 0.48  | 1.245715836 | 0.512 | 0.044 | NA        | 3       |

Table S1 Continued

| Gene_marker   | myAUC | Avg_diff    | Power | Avg_logFC   | Pct.1 | Pct.2 | P_val_adj | Cluster |
|---------------|-------|-------------|-------|-------------|-------|-------|-----------|---------|
| RP5-887A10.1  | 0.739 | 1.408687628 | 0.478 | 1.408687628 | 0.506 | 0.035 | NA        | 3       |
| FCRL2         | 0.738 | 1.183046235 | 0.476 | 1.183046235 | 0.514 | 0.047 | NA        | 3       |
| FAM129C       | 0.737 | 1.186769319 | 0.474 | 1.186769319 | 0.506 | 0.04  | NA        | 3       |
| ARHGAP24      | 0.737 | 1.171619277 | 0.474 | 1.171619277 | 0.503 | 0.036 | NA        | 3       |
| CLECL1        | 0.734 | 1.141155999 | 0.468 | 1.141155999 | 0.514 | 0.06  | NA        | 3       |
| GNG11         | 0.733 | 1.181735457 | 0.466 | 1.181735457 | 0.497 | 0.04  | NA        | 3       |
| DUSP1         | 0.732 | 0.72726576  | 0.464 | 0.72726576  | 0.905 | 0.711 | NA        | 3       |
| HLA-DQA2      | 0.729 | 0.806894695 | 0.458 | 0.806894695 | 0.734 | 0.334 | NA        | 3       |
| LY86          | 0.728 | 1.095702368 | 0.456 | 1.095702368 | 0.488 | 0.04  | NA        | 3       |
| HLA-DMB       | 0.728 | 1.018478384 | 0.456 | 1.018478384 | 0.548 | 0.112 | NA        | 3       |
| IGHD          | 0.727 | 1.126875383 | 0.454 | 1.126875383 | 0.49  | 0.044 | NA        | 3       |
| RP11-386I14.4 | 0.726 | 1.08388621  | 0.452 | 1.08388621  | 0.661 | 0.285 | NA        | 3       |
| RP11-231C14.7 | 0.721 | 1.124857811 | 0.442 | 1.124857811 | 0.475 | 0.042 | NA        | 3       |
| TCL1A         | 0.719 | 1.13480931  | 0.438 | 1.13480931  | 0.47  | 0.036 | NA        | 3       |
| TSC22D3       | 0.719 | 0.556829576 | 0.438 | 0.556829576 | 0.929 | 0.762 | NA        | 3       |
| PTMA          | 0.719 | 0.354679733 | 0.438 | 0.354679733 | 1     | 0.999 | NA        | 3       |
| GSTP1         | 0.718 | 0.777266861 | 0.436 | 0.777266861 | 0.778 | 0.493 | NA        | 3       |
| RHOB          | 0.717 | 1.260208226 | 0.434 | 1.260208226 | 0.479 | 0.06  | NA        | 3       |
| CD19          | 0.717 | 1.085021295 | 0.434 | 1.085021295 | 0.481 | 0.061 | NA        | 3       |
| NCF1          | 0.717 | 0.91275865  | 0.434 | 0.91275865  | 0.556 | 0.151 | NA        | 3       |
| ITM2C         | 0.716 | 1.012729233 | 0.432 | 1.012729233 | 0.532 | 0.122 | NA        | 3       |
| MT-ND1        | 0.715 | 0.563116939 | 0.43  | 0.563116939 | 0.938 | 0.775 | NA        | 3       |
| MT-CO2        | 0.712 | 0.346669126 | 0.424 | 0.346669126 | 0.998 | 0.997 | NA        | 3       |
| CXCR4         | 0.709 | 0.738836566 | 0.418 | 0.738836566 | 0.803 | 0.568 | NA        | 3       |
| SEC62         | 0.706 | 0.732654752 | 0.412 | 0.732654752 | 0.743 | 0.437 | NA        | 3       |
| SMARCB1       | 0.703 | 0.912583928 | 0.406 | 0.912583928 | 0.519 | 0.142 | NA        | 3       |
| IGLC2         | 0.836 | 0.347225889 | 0.672 | 0.347225889 | 1     | 0.945 | NA        | 4       |
| IGLC3         | 0.821 | 0.295402194 | 0.642 | 0.295402194 | 0.976 | 0.472 | NA        | 4       |
| CD79B         | 0.804 | 0.71033081  | 0.608 | 0.71033081  | 0.915 | 0.29  | NA        | 4       |
| MS4A1         | 0.798 | 0.673833584 | 0.596 | 0.673833584 | 0.878 | 0.228 | NA        | 4       |

Table S1 Continued

| Gene_marker | myAUC | Avg_diff    | Power | Avg_logFC   | Pct.1 | Pct.2 | P_val_adj | Cluster |
|-------------|-------|-------------|-------|-------------|-------|-------|-----------|---------|
| CD74        | 0.798 | 0.598285058 | 0.596 | 0.598285058 | 1     | 0.936 | NA        | 4       |
| BTG2        | 0.792 | 0.795356092 | 0.584 | 0.795356092 | 0.854 | 0.294 | NA        | 4       |
| CCND1       | 0.787 | 0.767314033 | 0.574 | 0.767314033 | 0.799 | 0.182 | NA        | 4       |
| MT-ND4      | 0.783 | 0.450337734 | 0.566 | 0.450337734 | 1     | 0.985 | NA        | 4       |
| CD79A       | 0.778 | 0.634841931 | 0.556 | 0.634841931 | 0.848 | 0.249 | NA        | 4       |
| IGLC7       | 0.765 | 0.679873532 | 0.53  | 0.679873532 | 0.774 | 0.207 | NA        | 4       |
| HLA-DRA     | 0.762 | 0.537652465 | 0.524 | 0.537652465 | 0.963 | 0.604 | NA        | 4       |
| EGR1        | 0.755 | 0.790014526 | 0.51  | 0.790014526 | 0.713 | 0.182 | NA        | 4       |
| IER2        | 0.751 | 0.60201819  | 0.502 | 0.60201819  | 0.945 | 0.562 | NA        | 4       |
| H3F3B       | 0.744 | 0.46571021  | 0.488 | 0.46571021  | 1     | 0.956 | NA        | 4       |
| KLF6        | 0.741 | 0.582141464 | 0.482 | 0.582141464 | 0.945 | 0.673 | NA        | 4       |
| MT-ND3      | 0.736 | 0.380952708 | 0.472 | 0.380952708 | 1     | 0.98  | NA        | 4       |
| IGLC6       | 0.733 | 0.481392546 | 0.466 | 0.481392546 | 0.671 | 0.157 | NA        | 4       |
| VPREB3      | 0.731 | 0.670434248 | 0.462 | 0.670434248 | 0.665 | 0.174 | NA        | 4       |
| MALAT1      | 0.723 | 0.260883932 | 0.446 | 0.260883932 | 1     | 1     | NA        | 4       |
| CD69        | 0.712 | 0.460281783 | 0.424 | 0.460281783 | 0.902 | 0.594 | NA        | 4       |
| CXCR4       | 0.702 | 0.565701781 | 0.404 | 0.565701781 | 0.915 | 0.587 | NA        | 4       |
| MT-ND1      | 0.702 | 0.413669242 | 0.404 | 0.413669242 | 0.976 | 0.79  | NA        | 4       |
| GPLY        | 0.978 | 2.723132533 | 0.956 | 2.723132533 | 0.992 | 0.415 | NA        | 5       |
| TYROBP      | 0.932 | 2.151456962 | 0.864 | 2.151456962 | 0.901 | 0.078 | NA        | 5       |
| KLRF1       | 0.924 | 2.242124133 | 0.848 | 2.242124133 | 0.863 | 0.032 | NA        | 5       |
| KLRD1       | 0.888 | 1.263424072 | 0.776 | 1.263424072 | 0.962 | 0.437 | NA        | 5       |
| TRDC        | 0.879 | 1.931205686 | 0.758 | 1.931205686 | 0.779 | 0.033 | NA        | 5       |
| GZMB        | 0.876 | 1.784732992 | 0.752 | 1.784732992 | 0.916 | 0.305 | NA        | 5       |
| FCER1G      | 0.871 | 1.855822643 | 0.742 | 1.855822643 | 0.779 | 0.044 | NA        | 5       |
| ID2         | 0.85  | 1.213664129 | 0.7   | 1.213664129 | 0.924 | 0.422 | NA        | 5       |
| NKG7        | 0.847 | 0.924740766 | 0.694 | 0.924740766 | 0.992 | 0.828 | NA        | 5       |
| CTSW        | 0.843 | 0.991041423 | 0.686 | 0.991041423 | 0.969 | 0.592 | NA        | 5       |
| SRGN        | 0.816 | 0.886395147 | 0.632 | 0.886395147 | 0.954 | 0.702 | NA        | 5       |
| IFITM2      | 0.815 | 1.090718996 | 0.63  | 1.090718996 | 0.901 | 0.585 | NA        | 5       |

Table S1 Continued

| Gene_marker | myAUC | Avg_diff    | Power | Avg_logFC   | Pct.1 | Pct.2 | P_val_adj | Cluster |
|-------------|-------|-------------|-------|-------------|-------|-------|-----------|---------|
| KLRC1       | 0.812 | 2.043367204 | 0.624 | 2.043367204 | 0.634 | 0.017 | NA        | 5       |
| CD7         | 0.808 | 1.217271549 | 0.616 | 1.217271549 | 0.832 | 0.4   | NA        | 5       |
| HOPX        | 0.803 | 1.291944956 | 0.606 | 1.291944956 | 0.748 | 0.216 | NA        | 5       |
| CMC1        | 0.791 | 0.969731961 | 0.582 | 0.969731961 | 0.901 | 0.5   | NA        | 5       |
| PLAC8       | 0.78  | 1.197874936 | 0.56  | 1.197874936 | 0.695 | 0.184 | NA        | 5       |
| IFITM3      | 0.732 | 1.125425877 | 0.464 | 1.125425877 | 0.527 | 0.07  | NA        | 5       |
| PRF1        | 0.732 | 0.941528478 | 0.464 | 0.941528478 | 0.748 | 0.374 | NA        | 5       |
| CST7        | 0.727 | 0.607811752 | 0.454 | 0.607811752 | 0.931 | 0.685 | NA        | 5       |
| CD63        | 0.72  | 0.811796574 | 0.44  | 0.811796574 | 0.695 | 0.336 | NA        | 5       |
| GZMA        | 0.713 | 0.559437474 | 0.426 | 0.559437474 | 0.939 | 0.625 | NA        | 5       |
| HCST        | 0.71  | 0.480784124 | 0.42  | 0.480784124 | 0.962 | 0.806 | NA        | 5       |
| IL2RB       | 0.709 | 0.970288789 | 0.418 | 0.970288789 | 0.542 | 0.143 | NA        | 5       |
| KLRB1       | 0.701 | 0.923972139 | 0.402 | 0.923972139 | 0.595 | 0.215 | NA        | 5       |
| MZB1        | 0.998 | 2.711108644 | 0.996 | 2.711108644 | 1     | 0.178 | NA        | 6       |
| SSR4        | 0.996 | 1.877800812 | 0.992 | 1.877800812 | 1     | 0.645 | NA        | 6       |
| DERL3       | 0.96  | 1.644166938 | 0.92  | 1.644166938 | 0.973 | 0.065 | NA        | 6       |
| ITM2C       | 0.922 | 1.304086053 | 0.844 | 1.304086053 | 0.986 | 0.164 | NA        | 6       |
| PRDX4       | 0.903 | 1.250268974 | 0.806 | 1.250268974 | 0.877 | 0.08  | NA        | 6       |
| XBP1        | 0.894 | 1.361604091 | 0.788 | 1.361604091 | 0.959 | 0.311 | NA        | 6       |
| TNFRSF17    | 0.884 | 1.110566148 | 0.768 | 1.110566148 | 0.781 | 0.009 | NA        | 6       |
| HERPUD1     | 0.882 | 1.244777479 | 0.764 | 1.244777479 | 0.986 | 0.333 | NA        | 6       |
| FKBP11      | 0.873 | 1.292225199 | 0.746 | 1.292225199 | 0.904 | 0.255 | NA        | 6       |
| FKBP2       | 0.859 | 1.058075859 | 0.718 | 1.058075859 | 0.932 | 0.214 | NA        | 6       |
| JCHAIN      | 0.855 | 4.089093936 | 0.71  | 4.089093936 | 0.795 | 0.113 | NA        | 6       |
| SEC11C      | 0.853 | 1.057319406 | 0.706 | 1.057319406 | 0.918 | 0.22  | NA        | 6       |
| UBE2J1      | 0.852 | 0.947665303 | 0.704 | 0.947665303 | 0.863 | 0.123 | NA        | 6       |
| HSP90B1     | 0.84  | 1.03043488  | 0.68  | 1.03043488  | 0.973 | 0.365 | NA        | 6       |
| IGHG4       | 0.839 | 4.459287464 | 0.678 | 4.459287464 | 1     | 0.974 | NA        | 6       |
| IGKC        | 0.838 | 4.795639548 | 0.676 | 4.795639548 | 1     | 0.995 | NA        | 6       |
| IGHG1       | 0.838 | 4.656961088 | 0.676 | 4.656961088 | 0.959 | 0.764 | NA        | 6       |

Table S1 Continued

| Gene_marker | myAUC | Avg_diff    | Power | Avg_logFC   | Pct.1 | Pct.2 | P_val_adj | Cluster |
|-------------|-------|-------------|-------|-------------|-------|-------|-----------|---------|
| TXNDC11     | 0.838 | 0.702708868 | 0.676 | 0.702708868 | 0.781 | 0.068 | NA        | 6       |
| EAF2        | 0.831 | 0.74974738  | 0.662 | 0.74974738  | 0.685 | 0.016 | NA        | 6       |
| CD38        | 0.831 | 0.588450598 | 0.662 | 0.588450598 | 0.753 | 0.056 | NA        | 6       |
| SPCS3       | 0.821 | 0.808667372 | 0.642 | 0.808667372 | 0.863 | 0.173 | NA        | 6       |
| DNAJB9      | 0.821 | 0.733527434 | 0.642 | 0.733527434 | 0.822 | 0.123 | NA        | 6       |
| MEF2C       | 0.814 | 0.589655995 | 0.628 | 0.589655995 | 0.726 | 0.064 | NA        | 6       |
| NPC2        | 0.81  | 0.617570744 | 0.62  | 0.617570744 | 0.904 | 0.191 | NA        | 6       |
| SSR3        | 0.806 | 0.714707297 | 0.612 | 0.714707297 | 0.863 | 0.184 | NA        | 6       |
| MANF        | 0.803 | 0.790530232 | 0.606 | 0.790530232 | 0.877 | 0.202 | NA        | 6       |
| PDIA4       | 0.801 | 0.768006518 | 0.602 | 0.768006518 | 0.836 | 0.174 | NA        | 6       |
| SEL1L3      | 0.801 | 0.556122924 | 0.602 | 0.556122924 | 0.699 | 0.065 | NA        | 6       |
| GNG7        | 0.798 | 0.611336075 | 0.596 | 0.611336075 | 0.616 | 0.014 | NA        | 6       |
| CRELD2      | 0.796 | 0.590437309 | 0.592 | 0.590437309 | 0.74  | 0.099 | NA        | 6       |
| SDC1        | 0.792 | 0.505858246 | 0.584 | 0.505858246 | 0.589 | 0.003 | NA        | 6       |
| LMAN1       | 0.791 | 0.460372286 | 0.582 | 0.460372286 | 0.753 | 0.108 | NA        | 6       |
| TRIB1       | 0.787 | 0.562106926 | 0.574 | 0.562106926 | 0.589 | 0.01  | NA        | 6       |
| VIMP        | 0.78  | 0.565840479 | 0.56  | 0.565840479 | 0.89  | 0.227 | NA        | 6       |
| TXNDC5      | 0.777 | 0.535638049 | 0.554 | 0.535638049 | 0.562 | 0.005 | NA        | 6       |
| ERLEC1      | 0.777 | 0.46846779  | 0.554 | 0.46846779  | 0.795 | 0.152 | NA        | 6       |
| IGHG2       | 0.775 | 2.164210259 | 0.55  | 2.164210259 | 0.699 | 0.149 | NA        | 6       |
| MYDGF       | 0.775 | 0.627595575 | 0.55  | 0.627595575 | 0.877 | 0.239 | NA        | 6       |
| HM13        | 0.775 | 0.441673502 | 0.55  | 0.441673502 | 0.795 | 0.154 | NA        | 6       |
| CD79A       | 0.774 | 0.374109271 | 0.548 | 0.374109271 | 0.932 | 0.261 | NA        | 6       |
| JSRP1       | 0.769 | 0.810301936 | 0.538 | 0.810301936 | 0.548 | 0.008 | NA        | 6       |
| TXNDC15     | 0.769 | 0.346018086 | 0.538 | 0.346018086 | 0.63  | 0.057 | NA        | 6       |
| FAM46C      | 0.768 | 0.473027672 | 0.536 | 0.473027672 | 0.658 | 0.082 | NA        | 6       |
| PABPC4      | 0.766 | 0.455020623 | 0.532 | 0.455020623 | 0.753 | 0.147 | NA        | 6       |
| SELK        | 0.764 | 0.61577799  | 0.528 | 0.61577799  | 0.932 | 0.305 | NA        | 6       |
| SDF2L1      | 0.764 | 0.560508606 | 0.528 | 0.560508606 | 0.808 | 0.194 | NA        | 6       |
| CD59        | 0.762 | 0.556510903 | 0.524 | 0.556510903 | 0.616 | 0.064 | NA        | 6       |

Table S1 Continued

| Gene_marker | myAUC | Avg_diff    | Power | Avg_logFC   | Pct.1 | Pct.2 | P_val_adj | Cluster |
|-------------|-------|-------------|-------|-------------|-------|-------|-----------|---------|
| LY96        | 0.762 | 0.336232806 | 0.524 | 0.336232806 | 0.671 | 0.092 | NA        | 6       |
| KDELRL1     | 0.761 | 0.286659442 | 0.522 | 0.286659442 | 0.753 | 0.139 | NA        | 6       |
| PDK1        | 0.757 | 0.423721429 | 0.514 | 0.423721429 | 0.562 | 0.032 | NA        | 6       |
| IGHG3       | 0.754 | 3.651307515 | 0.508 | 3.651307515 | 0.904 | 0.354 | NA        | 6       |
| CHPF        | 0.754 | 0.431084142 | 0.508 | 0.431084142 | 0.534 | 0.017 | NA        | 6       |
| TPD52       | 0.753 | 0.288803467 | 0.506 | 0.288803467 | 0.685 | 0.111 | NA        | 6       |
| SPAG4       | 0.751 | 0.440217791 | 0.502 | 0.440217791 | 0.507 | 0.003 | NA        | 6       |
| ARSA        | 0.751 | 0.336735179 | 0.502 | 0.336735179 | 0.603 | 0.066 | NA        | 6       |
| PLPP5       | 0.75  | 0.442195772 | 0.5   | 0.442195772 | 0.63  | 0.088 | NA        | 6       |
| SPCS1       | 0.745 | 0.554935185 | 0.49  | 0.554935185 | 0.932 | 0.494 | NA        | 6       |
| ANKRD28     | 0.745 | 0.381987418 | 0.49  | 0.381987418 | 0.548 | 0.04  | NA        | 6       |
| SRPRB       | 0.744 | 0.32431765  | 0.488 | 0.32431765  | 0.589 | 0.067 | NA        | 6       |
| ZBP1        | 0.74  | 0.359807006 | 0.48  | 0.359807006 | 0.603 | 0.081 | NA        | 6       |
| IGHA2       | 0.739 | 1.946985611 | 0.478 | 1.946985611 | 0.712 | 0.148 | NA        | 6       |
| ARF4        | 0.737 | 0.275991622 | 0.474 | 0.275991622 | 0.767 | 0.18  | NA        | 6       |
| SELM        | 0.735 | 0.390527022 | 0.47  | 0.390527022 | 0.671 | 0.136 | NA        | 6       |
| GMPPB       | 0.734 | 0.319575312 | 0.468 | 0.319575312 | 0.562 | 0.063 | NA        | 6       |
| SEC14L1     | 0.731 | 0.293779748 | 0.462 | 0.293779748 | 0.521 | 0.039 | NA        | 6       |
| CECR1       | 0.728 | 0.263924544 | 0.456 | 0.263924544 | 0.562 | 0.071 | NA        | 6       |
| NUCB2       | 0.727 | 0.373230124 | 0.454 | 0.373230124 | 0.74  | 0.19  | NA        | 6       |
| DNAJB11     | 0.723 | 0.251747579 | 0.446 | 0.251747579 | 0.603 | 0.102 | NA        | 6       |
| SPCS2       | 0.721 | 0.561580207 | 0.442 | 0.561580207 | 0.918 | 0.469 | NA        | 6       |
| LMAN2       | 0.72  | 0.346821754 | 0.44  | 0.346821754 | 0.89  | 0.296 | NA        | 6       |
| IGKV1-12    | 0.719 | 1.279742679 | 0.438 | 1.279742679 | 0.452 | 0.013 | NA        | 6       |
| SEL1L       | 0.718 | 0.294303842 | 0.436 | 0.294303842 | 0.493 | 0.04  | NA        | 6       |
| IGKV3-20    | 0.716 | 0.4474702   | 0.432 | 0.4474702   | 0.589 | 0.114 | NA        | 6       |
| KDELRL2     | 0.715 | 0.26920995  | 0.43  | 0.26920995  | 0.726 | 0.187 | NA        | 6       |
| CREB3L2     | 0.712 | 0.251392162 | 0.424 | 0.251392162 | 0.493 | 0.048 | NA        | 6       |
| HSPA5       | 0.711 | 0.493755595 | 0.422 | 0.493755595 | 0.808 | 0.268 | NA        | 6       |
| OSTC        | 0.711 | 0.25467129  | 0.422 | 0.25467129  | 0.822 | 0.254 | NA        | 6       |



Table S1 Continued

| Gene_marker | myAUC | Avg_diff    | Power | Avg_logFC   | Pct.1 | Pct.2 | P_val_adj | Cluster |
|-------------|-------|-------------|-------|-------------|-------|-------|-----------|---------|
| SIL1        | 0.709 | 0.304907047 | 0.418 | 0.304907047 | 0.479 | 0.043 | NA        | 6       |
| PIM2        | 0.705 | 0.289600758 | 0.41  | 0.289600758 | 0.726 | 0.216 | NA        | 6       |
| SPATS2      | 0.704 | 0.317092918 | 0.408 | 0.317092918 | 0.452 | 0.031 | NA        | 6       |
| GAS6        | 0.704 | 0.264306953 | 0.408 | 0.264306953 | 0.411 | 0.003 | NA        | 6       |
| ATF4        | 0.704 | 0.251447012 | 0.408 | 0.251447012 | 0.699 | 0.191 | NA        | 6       |
| CPNE5       | 0.703 | 0.34041057  | 0.406 | 0.34041057  | 0.425 | 0.014 | NA        | 6       |
| IFI6        | 0.702 | 0.307820817 | 0.404 | 0.307820817 | 0.589 | 0.129 | NA        | 6       |
| STMN1       | 0.965 | 2.297809923 | 0.93  | 2.297809923 | 0.971 | 0.172 | NA        | 7       |
| TUBA1B      | 0.938 | 1.991089895 | 0.876 | 1.991089895 | 0.986 | 0.367 | NA        | 7       |
| HMG2        | 0.907 | 1.348179172 | 0.814 | 1.348179172 | 1     | 0.665 | NA        | 7       |
| H2AFZ       | 0.905 | 1.385411674 | 0.81  | 1.385411674 | 0.986 | 0.474 | NA        | 7       |
| HMGB2       | 0.889 | 2.061483707 | 0.778 | 2.061483707 | 0.913 | 0.351 | NA        | 7       |
| TUBB        | 0.881 | 1.612038781 | 0.762 | 1.612038781 | 0.942 | 0.4   | NA        | 7       |
| PTMA        | 0.859 | 0.661983799 | 0.718 | 0.661983799 | 1     | 0.999 | NA        | 7       |
| HMGB1       | 0.851 | 0.995879835 | 0.702 | 0.995879835 | 1     | 0.853 | NA        | 7       |
| KIAA0101    | 0.826 | 1.453773822 | 0.652 | 1.453773822 | 0.667 | 0.018 | NA        | 7       |
| H3F3A       | 0.805 | 0.674090574 | 0.61  | 0.674090574 | 1     | 0.881 | NA        | 7       |
| RANBP1      | 0.794 | 0.806610228 | 0.588 | 0.806610228 | 0.87  | 0.295 | NA        | 7       |
| HLA-DRA     | 0.777 | 0.746101745 | 0.554 | 0.746101745 | 0.986 | 0.612 | NA        | 7       |
| ZWINT       | 0.775 | 1.173900193 | 0.55  | 1.173900193 | 0.565 | 0.016 | NA        | 7       |
| CARHSP1     | 0.774 | 0.842077465 | 0.548 | 0.842077465 | 0.739 | 0.173 | NA        | 7       |
| DEK         | 0.774 | 0.813493668 | 0.548 | 0.813493668 | 0.855 | 0.372 | NA        | 7       |
| HMG1        | 0.769 | 0.625142124 | 0.538 | 0.625142124 | 0.942 | 0.661 | NA        | 7       |
| GAPDH       | 0.768 | 0.743400516 | 0.536 | 0.743400516 | 0.971 | 0.88  | NA        | 7       |
| CBX3        | 0.759 | 0.666868285 | 0.518 | 0.666868285 | 0.884 | 0.467 | NA        | 7       |
| TYMS        | 0.758 | 1.149808384 | 0.516 | 1.149808384 | 0.522 | 0.006 | NA        | 7       |
| ANP32B      | 0.758 | 0.813950802 | 0.516 | 0.813950802 | 0.797 | 0.36  | NA        | 7       |
| MCM7        | 0.754 | 0.949826267 | 0.508 | 0.949826267 | 0.58  | 0.07  | NA        | 7       |
| CD74        | 0.753 | 0.573761984 | 0.506 | 0.573761984 | 1     | 0.937 | NA        | 7       |
| DUT         | 0.748 | 0.925991613 | 0.496 | 0.925991613 | 0.696 | 0.248 | NA        | 7       |

Table S1 Continued

| Gene_marker | myAUC | Avg_diff    | Power | Avg_logFC   | Pct.1 | Pct.2 | P_val_adj | Cluster |
|-------------|-------|-------------|-------|-------------|-------|-------|-----------|---------|
| PKM         | 0.747 | 0.69468829  | 0.494 | 0.69468829  | 0.899 | 0.431 | NA        | 7       |
| NASP        | 0.746 | 0.857084556 | 0.492 | 0.857084556 | 0.623 | 0.127 | NA        | 7       |
| MDK         | 0.741 | 1.287873859 | 0.482 | 1.287873859 | 0.565 | 0.103 | NA        | 7       |
| HNRNPA2B1   | 0.741 | 0.560379411 | 0.482 | 0.560379411 | 0.942 | 0.718 | NA        | 7       |
| IGLC6       | 0.739 | 1.457675486 | 0.478 | 1.457675486 | 0.609 | 0.17  | NA        | 7       |
| RAN         | 0.736 | 0.671980636 | 0.472 | 0.671980636 | 0.855 | 0.404 | NA        | 7       |
| PCNA        | 0.733 | 1.03961907  | 0.466 | 1.03961907  | 0.536 | 0.072 | NA        | 7       |
| H2AFV       | 0.732 | 0.811738345 | 0.464 | 0.811738345 | 0.71  | 0.273 | NA        | 7       |
| LSM5        | 0.729 | 0.730726681 | 0.458 | 0.730726681 | 0.739 | 0.291 | NA        | 7       |
| GSTP1       | 0.728 | 0.615119335 | 0.456 | 0.615119335 | 0.913 | 0.526 | NA        | 7       |
| MT-CO3      | 0.728 | 0.387814293 | 0.456 | 0.387814293 | 1     | 0.994 | NA        | 7       |
| HIST1H4C    | 0.723 | 1.720015824 | 0.446 | 1.720015824 | 0.623 | 0.206 | NA        | 7       |
| MKI67       | 0.721 | 1.17438697  | 0.442 | 1.17438697  | 0.449 | 0.008 | NA        | 7       |
| MS4A1       | 0.721 | 1.162497982 | 0.442 | 1.162497982 | 0.638 | 0.248 | NA        | 7       |
| NUCKS1      | 0.719 | 0.741354925 | 0.438 | 0.741354925 | 0.754 | 0.285 | NA        | 7       |
| H2AFY       | 0.719 | 0.63406173  | 0.438 | 0.63406173  | 0.696 | 0.225 | NA        | 7       |
| MARCKSL1    | 0.715 | 0.757168944 | 0.43  | 0.757168944 | 0.652 | 0.231 | NA        | 7       |
| HNRNPA1     | 0.713 | 0.371964168 | 0.426 | 0.371964168 | 0.971 | 0.91  | NA        | 7       |
| SIVA1       | 0.711 | 0.640679949 | 0.422 | 0.640679949 | 0.696 | 0.272 | NA        | 7       |
| NAP1L1      | 0.711 | 0.494014083 | 0.422 | 0.494014083 | 0.884 | 0.575 | NA        | 7       |
| RPA3        | 0.709 | 0.682117268 | 0.418 | 0.682117268 | 0.594 | 0.158 | NA        | 7       |
| CKS1B       | 0.708 | 1.049814082 | 0.416 | 1.049814082 | 0.464 | 0.052 | NA        | 7       |
| SUMO2       | 0.707 | 0.430121774 | 0.414 | 0.430121774 | 0.913 | 0.7   | NA        | 7       |
| SET         | 0.705 | 0.734089086 | 0.41  | 0.734089086 | 0.768 | 0.373 | NA        | 7       |
| IGLC3       | 0.705 | 0.668078306 | 0.41  | 0.668078306 | 0.783 | 0.487 | NA        | 7       |
| CKS2        | 0.704 | 0.935403319 | 0.408 | 0.935403319 | 0.478 | 0.074 | NA        | 7       |
| TCL1A       | 0.702 | 1.191313204 | 0.404 | 1.191313204 | 0.478 | 0.089 | NA        | 7       |
| LMNB1       | 0.701 | 0.685412585 | 0.402 | 0.685412585 | 0.449 | 0.039 | NA        | 7       |
| ANXA5       | 0.701 | 0.525765388 | 0.402 | 0.525765388 | 0.667 | 0.221 | NA        | 7       |
| LST1        | 1     | 3.713815859 | 1     | 3.713815859 | 1     | 0.078 | NA        | 8       |

Table S1 Continued

| Gene_marker | myAUC | Avg_diff    | Power | Avg_logFC   | Pct.1 | Pct.2 | P_val_adj | Cluster |
|-------------|-------|-------------|-------|-------------|-------|-------|-----------|---------|
| AIF1        | 1     | 3.459377283 | 1     | 3.459377283 | 1     | 0.102 | NA        | 8       |
| CST3        | 1     | 3.094793865 | 1     | 3.094793865 | 1     | 0.03  | NA        | 8       |
| SERPINA1    | 1     | 2.671569858 | 1     | 2.671569858 | 1     | 0.007 | NA        | 8       |
| FTH1        | 1     | 2.402480627 | 1     | 2.402480627 | 1     | 0.971 | NA        | 8       |
| FTL         | 1     | 2.031734182 | 1     | 2.031734182 | 1     | 0.98  | NA        | 8       |
| CTSS        | 0.999 | 2.40944544  | 0.998 | 2.40944544  | 1     | 0.324 | NA        | 8       |
| FCER1G      | 0.998 | 3.269127652 | 0.996 | 3.269127652 | 1     | 0.057 | NA        | 8       |
| IFITM3      | 0.998 | 3.14950733  | 0.996 | 3.14950733  | 1     | 0.073 | NA        | 8       |
| TYROBP      | 0.998 | 3.137018335 | 0.996 | 3.137018335 | 1     | 0.094 | NA        | 8       |
| FCGR3A      | 0.995 | 2.390812576 | 0.99  | 2.390812576 | 1     | 0.106 | NA        | 8       |
| PSAP        | 0.995 | 2.102174646 | 0.99  | 2.102174646 | 1     | 0.401 | NA        | 8       |
| SAT1        | 0.993 | 2.380784655 | 0.986 | 2.380784655 | 1     | 0.435 | NA        | 8       |
| FCN1        | 0.99  | 2.860100925 | 0.98  | 2.860100925 | 0.98  | 0.01  | NA        | 8       |
| S100A11     | 0.99  | 2.006788942 | 0.98  | 2.006788942 | 1     | 0.411 | NA        | 8       |
| MS4A7       | 0.989 | 2.522592873 | 0.978 | 2.522592873 | 0.98  | 0.015 | NA        | 8       |
| FAM26F      | 0.983 | 2.013257254 | 0.966 | 2.013257254 | 0.98  | 0.034 | NA        | 8       |
| TYMP        | 0.98  | 2.11930838  | 0.96  | 2.11930838  | 0.98  | 0.1   | NA        | 8       |
| CD68        | 0.978 | 2.164736139 | 0.956 | 2.164736139 | 0.96  | 0.014 | NA        | 8       |
| S100A6      | 0.972 | 1.596372859 | 0.944 | 1.596372859 | 1     | 0.843 | NA        | 8       |
| CFD         | 0.969 | 2.339139765 | 0.938 | 2.339139765 | 0.94  | 0.01  | NA        | 8       |
| SPI1        | 0.965 | 2.080816672 | 0.93  | 2.080816672 | 0.94  | 0.033 | NA        | 8       |
| NPC2        | 0.963 | 1.769279211 | 0.926 | 1.769279211 | 0.98  | 0.194 | NA        | 8       |
| LINC01272   | 0.959 | 2.204156896 | 0.918 | 2.204156896 | 0.92  | 0.003 | NA        | 8       |
| S100A4      | 0.949 | 1.283928319 | 0.898 | 1.283928319 | 1     | 0.872 | NA        | 8       |
| IFITM2      | 0.948 | 1.586633872 | 0.896 | 1.586633872 | 0.98  | 0.59  | NA        | 8       |
| S100A9      | 0.946 | 2.160319107 | 0.892 | 2.160319107 | 0.9   | 0.015 | NA        | 8       |
| TMEM176B    | 0.939 | 1.665358491 | 0.878 | 1.665358491 | 0.88  | 0.002 | NA        | 8       |
| COTL1       | 0.928 | 1.086102857 | 0.856 | 1.086102857 | 1     | 0.679 | NA        | 8       |
| LGALS1      | 0.926 | 1.480099062 | 0.852 | 1.480099062 | 1     | 0.437 | NA        | 8       |
| OAZ1        | 0.925 | 0.887656228 | 0.85  | 0.887656228 | 1     | 0.901 | NA        | 8       |

Table S1 Continued

| Gene_marker | myAUC | Avg_diff    | Power | Avg_logFC   | Pct.1 | Pct.2 | P_val_adj | Cluster |
|-------------|-------|-------------|-------|-------------|-------|-------|-----------|---------|
| FKBP1A      | 0.923 | 1.200480973 | 0.846 | 1.200480973 | 0.98  | 0.355 | NA        | 8       |
| STXBP2      | 0.917 | 1.734442856 | 0.834 | 1.734442856 | 0.9   | 0.168 | NA        | 8       |
| LILRB2      | 0.917 | 1.537165798 | 0.834 | 1.537165798 | 0.84  | 0.008 | NA        | 8       |
| CEBPB       | 0.916 | 1.350220261 | 0.832 | 1.350220261 | 0.94  | 0.19  | NA        | 8       |
| PILRA       | 0.909 | 1.3853189   | 0.818 | 1.3853189   | 0.82  | 0.003 | NA        | 8       |
| TKT         | 0.906 | 1.518017518 | 0.812 | 1.518017518 | 0.9   | 0.158 | NA        | 8       |
| EVI2B       | 0.893 | 1.279423535 | 0.786 | 1.279423535 | 0.98  | 0.44  | NA        | 8       |
| ASAH1       | 0.893 | 1.259915825 | 0.786 | 1.259915825 | 0.88  | 0.115 | NA        | 8       |
| MNDA        | 0.891 | 1.617733818 | 0.782 | 1.617733818 | 0.8   | 0.027 | NA        | 8       |
| HLA-DPA1    | 0.885 | 1.029041056 | 0.77  | 1.029041056 | 1     | 0.681 | NA        | 8       |
| LRRC25      | 0.879 | 1.49501645  | 0.758 | 1.49501645  | 0.76  | 0.002 | NA        | 8       |
| NEAT1       | 0.878 | 1.088630499 | 0.756 | 1.088630499 | 1     | 0.64  | NA        | 8       |
| LYN         | 0.876 | 1.270752793 | 0.752 | 1.270752793 | 0.82  | 0.073 | NA        | 8       |
| TIMP1       | 0.873 | 1.330983482 | 0.746 | 1.330983482 | 0.84  | 0.106 | NA        | 8       |
| CSF1R       | 0.869 | 1.366855929 | 0.738 | 1.366855929 | 0.74  | 0.003 | NA        | 8       |
| PECAM1      | 0.869 | 1.237113722 | 0.738 | 1.237113722 | 0.8   | 0.067 | NA        | 8       |
| DUSP1       | 0.867 | 0.955371745 | 0.734 | 0.955371745 | 1     | 0.734 | NA        | 8       |
| CLEC7A      | 0.859 | 1.313019878 | 0.718 | 1.313019878 | 0.72  | 0.001 | NA        | 8       |
| CARD16      | 0.854 | 1.152908908 | 0.708 | 1.152908908 | 0.92  | 0.335 | NA        | 8       |
| CALM2       | 0.854 | 0.911842072 | 0.708 | 0.911842072 | 0.98  | 0.714 | NA        | 8       |
| TCF7L2      | 0.853 | 1.220962789 | 0.706 | 1.220962789 | 0.72  | 0.012 | NA        | 8       |
| NAP1L1      | 0.852 | 0.951224388 | 0.704 | 0.951224388 | 1     | 0.575 | NA        | 8       |
| HLA-DRA     | 0.852 | 0.944127206 | 0.704 | 0.944127206 | 1     | 0.614 | NA        | 8       |
| C10orf54    | 0.85  | 1.252504808 | 0.7   | 1.252504808 | 0.86  | 0.242 | NA        | 8       |
| MT-CO1      | 0.85  | 0.522470568 | 0.7   | 0.522470568 | 1     | 0.998 | NA        | 8       |
| PPM1N       | 0.848 | 1.330522424 | 0.696 | 1.330522424 | 0.72  | 0.026 | NA        | 8       |
| SOD2        | 0.843 | 1.281383165 | 0.686 | 1.281383165 | 0.76  | 0.079 | NA        | 8       |
| C1orf162    | 0.842 | 1.333235891 | 0.684 | 1.333235891 | 0.78  | 0.153 | NA        | 8       |
| PYCARD      | 0.842 | 1.108458716 | 0.684 | 1.108458716 | 0.9   | 0.292 | NA        | 8       |
| TSPO        | 0.841 | 1.06884555  | 0.682 | 1.06884555  | 0.88  | 0.328 | NA        | 8       |

Table S1 Continued

| Gene_marker | myAUC | Avg_diff    | Power | Avg_logFC   | Pct.1 | Pct.2 | P_val_adj | Cluster |
|-------------|-------|-------------|-------|-------------|-------|-------|-----------|---------|
| H3F3A       | 0.841 | 0.68404998  | 0.682 | 0.68404998  | 0.98  | 0.882 | NA        | 8       |
| LILRA5      | 0.84  | 1.291385234 | 0.68  | 1.291385234 | 0.68  | 0.001 | NA        | 8       |
| TNFSF10     | 0.839 | 1.334461738 | 0.678 | 1.334461738 | 0.76  | 0.114 | NA        | 8       |
| CPVL        | 0.839 | 1.17609639  | 0.678 | 1.17609639  | 0.68  | 0.002 | NA        | 8       |
| HCK         | 0.838 | 1.459964011 | 0.676 | 1.459964011 | 0.68  | 0.006 | NA        | 8       |
| CLEC12A     | 0.838 | 1.344483471 | 0.676 | 1.344483471 | 0.68  | 0.004 | NA        | 8       |
| FGL2        | 0.836 | 1.262466325 | 0.672 | 1.262466325 | 0.68  | 0.009 | NA        | 8       |
| RPS9        | 0.835 | 0.446450038 | 0.67  | 0.446450038 | 1     | 0.995 | NA        | 8       |
| MT2A        | 0.833 | 1.412777551 | 0.666 | 1.412777551 | 0.92  | 0.468 | NA        | 8       |
| ZFAND5      | 0.826 | 1.131006142 | 0.652 | 1.131006142 | 0.76  | 0.148 | NA        | 8       |
| VIM         | 0.825 | 0.807906408 | 0.65  | 0.807906408 | 0.98  | 0.563 | NA        | 8       |
| SLC11A1     | 0.824 | 1.089181269 | 0.648 | 1.089181269 | 0.66  | 0.01  | NA        | 8       |
| CFP         | 0.823 | 1.262863037 | 0.646 | 1.262863037 | 0.66  | 0.014 | NA        | 8       |
| C19orf38    | 0.822 | 1.113888738 | 0.644 | 1.113888738 | 0.66  | 0.017 | NA        | 8       |
| SLC31A2     | 0.817 | 1.126455526 | 0.634 | 1.126455526 | 0.64  | 0.006 | NA        | 8       |
| VAMP5       | 0.817 | 1.071662008 | 0.634 | 1.071662008 | 0.84  | 0.295 | NA        | 8       |
| CAPZA2      | 0.817 | 0.852405342 | 0.634 | 0.852405342 | 0.88  | 0.259 | NA        | 8       |
| DRAP1       | 0.817 | 0.766733154 | 0.634 | 0.766733154 | 0.96  | 0.475 | NA        | 8       |
| CYBA        | 0.812 | 0.549819073 | 0.624 | 0.549819073 | 1     | 0.926 | NA        | 8       |
| NCF2        | 0.806 | 1.175254129 | 0.612 | 1.175254129 | 0.62  | 0.008 | NA        | 8       |
| BRI3        | 0.806 | 1.114026269 | 0.612 | 1.114026269 | 0.68  | 0.07  | NA        | 8       |
| LYZ         | 0.805 | 1.243118387 | 0.61  | 1.243118387 | 0.62  | 0.012 | NA        | 8       |
| VMP1        | 0.804 | 1.070509468 | 0.608 | 1.070509468 | 0.78  | 0.197 | NA        | 8       |
| RHOC        | 0.803 | 1.052749458 | 0.606 | 1.052749458 | 0.76  | 0.177 | NA        | 8       |
| S100A8      | 0.802 | 1.624988557 | 0.604 | 1.624988557 | 0.62  | 0.021 | NA        | 8       |
| ARPC3       | 0.802 | 0.647134665 | 0.604 | 0.647134665 | 1     | 0.733 | NA        | 8       |
| LILRA1      | 0.8   | 1.204739295 | 0.6   | 1.204739295 | 0.6   | 0.001 | NA        | 8       |
| LILRB3      | 0.799 | 1.096368286 | 0.598 | 1.096368286 | 0.6   | 0.002 | NA        | 8       |
| ARRB2       | 0.798 | 0.865382246 | 0.596 | 0.865382246 | 0.84  | 0.247 | NA        | 8       |
| RNF130      | 0.796 | 1.016938286 | 0.592 | 1.016938286 | 0.66  | 0.063 | NA        | 8       |

Table S1 Continued

| Gene_marker | myAUC | Avg_diff    | Power | Avg_logFC   | Pct.1 | Pct.2 | P_val_adj | Cluster |
|-------------|-------|-------------|-------|-------------|-------|-------|-----------|---------|
| OAS1        | 0.794 | 0.9523526   | 0.588 | 0.9523526   | 0.66  | 0.064 | NA        | 8       |
| ANXA5       | 0.79  | 0.750200383 | 0.58  | 0.750200383 | 0.82  | 0.221 | NA        | 8       |
| TMSB4X      | 0.789 | 0.277221408 | 0.578 | 0.277221408 | 1     | 1     | NA        | 8       |
| ATG3        | 0.788 | 1.084119802 | 0.576 | 1.084119802 | 0.68  | 0.118 | NA        | 8       |
| RNH1        | 0.788 | 0.856405451 | 0.576 | 0.856405451 | 0.78  | 0.222 | NA        | 8       |
| WARS        | 0.786 | 1.133973017 | 0.572 | 1.133973017 | 0.6   | 0.029 | NA        | 8       |
| SDCBP       | 0.785 | 0.891509301 | 0.57  | 0.891509301 | 0.74  | 0.157 | NA        | 8       |
| RNASET2     | 0.785 | 0.783470356 | 0.57  | 0.783470356 | 0.9   | 0.422 | NA        | 8       |
| NACA        | 0.785 | 0.49208631  | 0.57  | 0.49208631  | 1     | 0.909 | NA        | 8       |
| CASP1       | 0.784 | 0.982400087 | 0.568 | 0.982400087 | 0.76  | 0.209 | NA        | 8       |
| SLC25A6     | 0.784 | 0.532329483 | 0.568 | 0.532329483 | 1     | 0.84  | NA        | 8       |
| LILRB1      | 0.782 | 1.123027018 | 0.564 | 1.123027018 | 0.6   | 0.034 | NA        | 8       |
| TNFRSF1B    | 0.781 | 1.036229939 | 0.562 | 1.036229939 | 0.68  | 0.142 | NA        | 8       |
| BID         | 0.78  | 0.996609214 | 0.56  | 0.996609214 | 0.66  | 0.098 | NA        | 8       |
| MAPKAPK3    | 0.78  | 0.835943354 | 0.56  | 0.835943354 | 0.64  | 0.064 | NA        | 8       |
| HLA-DRB1    | 0.78  | 0.671248131 | 0.56  | 0.671248131 | 0.96  | 0.655 | NA        | 8       |
| ITM2B       | 0.78  | 0.662407391 | 0.56  | 0.662407391 | 0.98  | 0.829 | NA        | 8       |
| ARPC1B      | 0.78  | 0.521373049 | 0.56  | 0.521373049 | 0.98  | 0.702 | NA        | 8       |
| LILRA2      | 0.779 | 0.99304584  | 0.558 | 0.99304584  | 0.56  | 0.002 | NA        | 8       |
| GPBAR1      | 0.779 | 0.857675288 | 0.558 | 0.857675288 | 0.56  | 0.001 | NA        | 8       |
| YBX1        | 0.779 | 0.571360953 | 0.558 | 0.571360953 | 1     | 0.805 | NA        | 8       |
| VASP        | 0.778 | 0.918792429 | 0.556 | 0.918792429 | 0.76  | 0.213 | NA        | 8       |
| AP1S2       | 0.778 | 0.91133967  | 0.556 | 0.91133967  | 0.72  | 0.161 | NA        | 8       |
| LY96        | 0.777 | 1.031228754 | 0.554 | 1.031228754 | 0.64  | 0.095 | NA        | 8       |
| CSTB        | 0.777 | 0.825114307 | 0.554 | 0.825114307 | 0.86  | 0.473 | NA        | 8       |
| GDI2        | 0.777 | 0.761335669 | 0.554 | 0.761335669 | 0.82  | 0.404 | NA        | 8       |
| RGS2        | 0.776 | 1.130006501 | 0.552 | 1.130006501 | 0.64  | 0.102 | NA        | 8       |
| HMOX1       | 0.776 | 0.964224339 | 0.552 | 0.964224339 | 0.56  | 0.007 | NA        | 8       |
| ATP6V1B2    | 0.776 | 0.905392252 | 0.552 | 0.905392252 | 0.62  | 0.056 | NA        | 8       |
| ACTB        | 0.776 | 0.490301291 | 0.552 | 0.490301291 | 1     | 1     | NA        | 8       |

Table S1 Continued

| Gene_marker | myAUC | Avg_diff    | Power | Avg_logFC   | Pct.1 | Pct.2 | P_val_adj | Cluster |
|-------------|-------|-------------|-------|-------------|-------|-------|-----------|---------|
| BCL2A1      | 0.775 | 1.049520206 | 0.55  | 1.049520206 | 0.66  | 0.12  | NA        | 8       |
| TMSB10      | 0.775 | 0.344070047 | 0.55  | 0.344070047 | 1     | 1     | NA        | 8       |
| GPX1        | 0.774 | 0.972518421 | 0.548 | 0.972518421 | 0.82  | 0.323 | NA        | 8       |
| RAB24       | 0.774 | 0.800303667 | 0.548 | 0.800303667 | 0.6   | 0.041 | NA        | 8       |
| LGALS9      | 0.773 | 0.85671542  | 0.546 | 0.85671542  | 0.68  | 0.121 | NA        | 8       |
| CD300E      | 0.77  | 1.126396129 | 0.54  | 1.126396129 | 0.54  | 0.001 | NA        | 8       |
| CDKN1C      | 0.769 | 1.094244225 | 0.538 | 1.094244225 | 0.54  | 0.003 | NA        | 8       |
| PLAUR       | 0.767 | 0.970776948 | 0.534 | 0.970776948 | 0.54  | 0.006 | NA        | 8       |
| LAMTOR4     | 0.767 | 0.677319874 | 0.534 | 0.677319874 | 0.94  | 0.48  | NA        | 8       |
| PGK1        | 0.765 | 0.738448475 | 0.53  | 0.738448475 | 0.86  | 0.343 | NA        | 8       |
| IFI30       | 0.764 | 0.978802169 | 0.528 | 0.978802169 | 0.54  | 0.011 | NA        | 8       |
| SMCO4       | 0.764 | 0.87018692  | 0.528 | 0.87018692  | 0.6   | 0.061 | NA        | 8       |
| DUSP6       | 0.763 | 0.868489884 | 0.526 | 0.868489884 | 0.56  | 0.028 | NA        | 8       |
| ZFP36       | 0.761 | 0.804047001 | 0.522 | 0.804047001 | 0.88  | 0.426 | NA        | 8       |
| MYL6        | 0.761 | 0.464767998 | 0.522 | 0.464767998 | 1     | 0.933 | NA        | 8       |
| RPS19       | 0.761 | 0.273806962 | 0.522 | 0.273806962 | 1     | 1     | NA        | 8       |
| C5AR1       | 0.76  | 1.067412458 | 0.52  | 1.067412458 | 0.52  | 0.001 | NA        | 8       |
| ANXA2       | 0.76  | 0.851478894 | 0.52  | 0.851478894 | 0.76  | 0.271 | NA        | 8       |
| VMO1        | 0.759 | 1.501564266 | 0.518 | 1.501564266 | 0.52  | 0.003 | NA        | 8       |
| CXCL16      | 0.759 | 1.079526426 | 0.518 | 1.079526426 | 0.52  | 0.004 | NA        | 8       |
| TMEM176A    | 0.759 | 0.918517506 | 0.518 | 0.918517506 | 0.52  | 0.002 | NA        | 8       |
| CD74        | 0.759 | 0.440648127 | 0.518 | 0.440648127 | 1     | 0.938 | NA        | 8       |
| MPEG1       | 0.758 | 0.972064658 | 0.516 | 0.972064658 | 0.54  | 0.021 | NA        | 8       |
| GCA         | 0.758 | 0.896023147 | 0.516 | 0.896023147 | 0.56  | 0.043 | NA        | 8       |
| FGR         | 0.755 | 0.818320377 | 0.51  | 0.818320377 | 0.7   | 0.184 | NA        | 8       |
| NOP10       | 0.755 | 0.706339608 | 0.51  | 0.706339608 | 0.84  | 0.388 | NA        | 8       |
| ATP6V0B     | 0.755 | 0.693411994 | 0.51  | 0.693411994 | 0.84  | 0.317 | NA        | 8       |
| UNC119      | 0.754 | 0.911042182 | 0.508 | 0.911042182 | 0.58  | 0.064 | NA        | 8       |
| RHOG        | 0.753 | 0.744443819 | 0.506 | 0.744443819 | 0.78  | 0.267 | NA        | 8       |
| BEST1       | 0.752 | 0.808917725 | 0.504 | 0.808917725 | 0.56  | 0.046 | NA        | 8       |

Table S1 Continued

| Gene_marker | myAUC | Avg_diff    | Power | Avg_logFC   | Pct.1 | Pct.2 | P_val_adj | Cluster |
|-------------|-------|-------------|-------|-------------|-------|-------|-----------|---------|
| TESC        | 0.751 | 0.98310888  | 0.502 | 0.98310888  | 0.6   | 0.096 | NA        | 8       |
| HLA-DPB1    | 0.751 | 0.580807353 | 0.502 | 0.580807353 | 0.98  | 0.779 | NA        | 8       |
| MS4A4A      | 0.75  | 0.98525475  | 0.5   | 0.98525475  | 0.5   | 0.001 | NA        | 8       |
| LAPTM5      | 0.75  | 0.500334906 | 0.5   | 0.500334906 | 0.96  | 0.705 | NA        | 8       |
| PTPN6       | 0.749 | 0.734806828 | 0.498 | 0.734806828 | 0.76  | 0.283 | NA        | 8       |
| GRN         | 0.749 | 0.729660929 | 0.498 | 0.729660929 | 0.64  | 0.126 | NA        | 8       |
| IGSF6       | 0.748 | 1.022729276 | 0.496 | 1.022729276 | 0.5   | 0.004 | NA        | 8       |
| SLC7A7      | 0.747 | 0.882320195 | 0.494 | 0.882320195 | 0.54  | 0.042 | NA        | 8       |
| CPPED1      | 0.745 | 0.903456642 | 0.49  | 0.903456642 | 0.52  | 0.028 | NA        | 8       |
| HN1         | 0.745 | 0.666683238 | 0.49  | 0.666683238 | 0.78  | 0.249 | NA        | 8       |
| PRELID1     | 0.744 | 0.686972542 | 0.488 | 0.686972542 | 0.8   | 0.36  | NA        | 8       |
| LGALS3      | 0.741 | 0.902181761 | 0.482 | 0.902181761 | 0.52  | 0.036 | NA        | 8       |
| RGS19       | 0.74  | 0.753303382 | 0.48  | 0.753303382 | 0.72  | 0.228 | NA        | 8       |
| GABARAP     | 0.74  | 0.653525604 | 0.48  | 0.653525604 | 0.8   | 0.346 | NA        | 8       |
| CUX1        | 0.738 | 0.816940863 | 0.476 | 0.816940863 | 0.52  | 0.04  | NA        | 8       |
| MT-ATP6     | 0.738 | 0.467936472 | 0.476 | 0.467936472 | 1     | 0.901 | NA        | 8       |
| SIGLEC10    | 0.737 | 0.925535401 | 0.474 | 0.925535401 | 0.5   | 0.026 | NA        | 8       |
| FOS         | 0.737 | 0.807143685 | 0.474 | 0.807143685 | 0.86  | 0.473 | NA        | 8       |
| PGLS        | 0.737 | 0.692405357 | 0.474 | 0.692405357 | 0.68  | 0.182 | NA        | 8       |
| LAPTM4A     | 0.737 | 0.590966986 | 0.474 | 0.590966986 | 0.8   | 0.276 | NA        | 8       |
| ITGB2       | 0.736 | 0.527872042 | 0.472 | 0.527872042 | 1     | 0.668 | NA        | 8       |
| SLC2A6      | 0.735 | 0.882508114 | 0.47  | 0.882508114 | 0.5   | 0.028 | NA        | 8       |
| SERF2       | 0.734 | 0.355955757 | 0.468 | 0.355955757 | 1     | 0.967 | NA        | 8       |
| HLA-DQA2    | 0.733 | 0.725772886 | 0.466 | 0.725772886 | 0.82  | 0.383 | NA        | 8       |
| GNG5        | 0.733 | 0.652388586 | 0.466 | 0.652388586 | 0.78  | 0.329 | NA        | 8       |
| RBX1        | 0.733 | 0.57159991  | 0.466 | 0.57159991  | 0.84  | 0.342 | NA        | 8       |
| TUBA1B      | 0.732 | 0.615468567 | 0.464 | 0.615468567 | 0.8   | 0.373 | NA        | 8       |
| GMFG        | 0.732 | 0.47310163  | 0.464 | 0.47310163  | 0.98  | 0.697 | NA        | 8       |
| STX11       | 0.731 | 0.927816637 | 0.462 | 0.927816637 | 0.5   | 0.039 | NA        | 8       |
| TALDO1      | 0.731 | 0.741144033 | 0.462 | 0.741144033 | 0.68  | 0.219 | NA        | 8       |



Table S1 Continued

| Gene_marker | myAUC | Avg_diff    | Power | Avg_logFC   | Pct.1 | Pct.2 | P_val_adj | Cluster |
|-------------|-------|-------------|-------|-------------|-------|-------|-----------|---------|
| MARCH1      | 0.731 | 0.694631154 | 0.462 | 0.694631154 | 0.56  | 0.08  | NA        | 8       |
| RNF149      | 0.731 | 0.655855157 | 0.462 | 0.655855157 | 0.68  | 0.193 | NA        | 8       |
| ZYX         | 0.731 | 0.646003736 | 0.462 | 0.646003736 | 0.66  | 0.17  | NA        | 8       |
| ID2         | 0.731 | 0.630673386 | 0.462 | 0.630673386 | 0.84  | 0.433 | NA        | 8       |
| CD48        | 0.731 | 0.578098124 | 0.462 | 0.578098124 | 0.86  | 0.532 | NA        | 8       |
| ARPC5       | 0.73  | 0.611100768 | 0.46  | 0.611100768 | 0.88  | 0.517 | NA        | 8       |
| KLF4        | 0.729 | 1.044444172 | 0.458 | 1.044444172 | 0.46  | 0.002 | NA        | 8       |
| APOBEC3A    | 0.729 | 0.944988123 | 0.458 | 0.944988123 | 0.46  | 0.001 | NA        | 8       |
| PSMA4       | 0.729 | 0.597439316 | 0.458 | 0.597439316 | 0.86  | 0.436 | NA        | 8       |
| THEMIS2     | 0.728 | 0.881475128 | 0.456 | 0.881475128 | 0.48  | 0.022 | NA        | 8       |
| RALB        | 0.727 | 0.691440221 | 0.454 | 0.691440221 | 0.52  | 0.052 | NA        | 8       |
| FCGR2A      | 0.726 | 0.926556969 | 0.452 | 0.926556969 | 0.46  | 0.008 | NA        | 8       |
| C20orf27    | 0.725 | 0.755180729 | 0.45  | 0.755180729 | 0.52  | 0.062 | NA        | 8       |
| CD86        | 0.724 | 0.803368936 | 0.448 | 0.803368936 | 0.46  | 0.011 | NA        | 8       |
| CAMK1       | 0.724 | 0.767444848 | 0.448 | 0.767444848 | 0.46  | 0.01  | NA        | 8       |
| SRGN        | 0.722 | 0.476090101 | 0.444 | 0.476090101 | 0.96  | 0.707 | NA        | 8       |
| CSTA        | 0.719 | 0.939556137 | 0.438 | 0.939556137 | 0.44  | 0.001 | NA        | 8       |
| NUP214      | 0.719 | 0.75176873  | 0.438 | 0.75176873  | 0.48  | 0.037 | NA        | 8       |
| SNAP23      | 0.719 | 0.639300847 | 0.438 | 0.639300847 | 0.64  | 0.168 | NA        | 8       |
| DOK2        | 0.719 | 0.575420816 | 0.438 | 0.575420816 | 0.82  | 0.325 | NA        | 8       |
| NAMPT       | 0.718 | 0.802692516 | 0.436 | 0.802692516 | 0.48  | 0.038 | NA        | 8       |
| GBP2        | 0.718 | 0.609678377 | 0.436 | 0.609678377 | 0.68  | 0.207 | NA        | 8       |
| FAM45A      | 0.718 | 0.592286905 | 0.436 | 0.592286905 | 0.56  | 0.097 | NA        | 8       |
| LTA4H       | 0.717 | 0.811727219 | 0.434 | 0.811727219 | 0.56  | 0.118 | NA        | 8       |
| TCIRG1      | 0.716 | 0.679347184 | 0.432 | 0.679347184 | 0.58  | 0.142 | NA        | 8       |
| COX5B       | 0.716 | 0.47585461  | 0.432 | 0.47585461  | 0.98  | 0.617 | NA        | 8       |
| SNX3        | 0.715 | 0.510592076 | 0.43  | 0.510592076 | 0.84  | 0.455 | NA        | 8       |
| MT-ND1      | 0.715 | 0.435973053 | 0.43  | 0.435973053 | 0.96  | 0.795 | NA        | 8       |
| MT-CYB      | 0.715 | 0.33810049  | 0.43  | 0.33810049  | 1     | 0.964 | NA        | 8       |
| SNX10       | 0.714 | 0.79911623  | 0.428 | 0.79911623  | 0.52  | 0.092 | NA        | 8       |

Table S1 Continued

| Gene_marker | myAUC | Avg_diff    | Power | Avg_logFC   | Pct.1 | Pct.2 | P_val_adj | Cluster |
|-------------|-------|-------------|-------|-------------|-------|-------|-----------|---------|
| TBXAS1      | 0.714 | 0.789346606 | 0.428 | 0.789346606 | 0.46  | 0.031 | NA        | 8       |
| WSB1        | 0.714 | 0.765471525 | 0.428 | 0.765471525 | 0.64  | 0.223 | NA        | 8       |
| UBE2J1      | 0.713 | 0.605901203 | 0.426 | 0.605901203 | 0.58  | 0.131 | NA        | 8       |
| UBE2D1      | 0.711 | 0.721756106 | 0.422 | 0.721756106 | 0.52  | 0.089 | NA        | 8       |
| ZEB2        | 0.711 | 0.522990233 | 0.422 | 0.522990233 | 0.7   | 0.251 | NA        | 8       |
| PPT1        | 0.71  | 0.654342516 | 0.42  | 0.654342516 | 0.56  | 0.125 | NA        | 8       |
| ATP5E       | 0.709 | 0.302194048 | 0.418 | 0.302194048 | 1     | 0.976 | NA        | 8       |
| SERP1       | 0.708 | 0.589907086 | 0.416 | 0.589907086 | 0.84  | 0.49  | NA        | 8       |
| CD55        | 0.707 | 0.643552947 | 0.414 | 0.643552947 | 0.5   | 0.073 | NA        | 8       |
| ATP1B3      | 0.707 | 0.582156299 | 0.414 | 0.582156299 | 0.62  | 0.181 | NA        | 8       |
| CTSC        | 0.707 | 0.536359172 | 0.414 | 0.536359172 | 0.8   | 0.375 | NA        | 8       |
| ADGRE1      | 0.706 | 0.805083989 | 0.412 | 0.805083989 | 0.42  | 0.008 | NA        | 8       |
| HSBP1       | 0.706 | 0.758361698 | 0.412 | 0.758361698 | 0.56  | 0.153 | NA        | 8       |
| IFNGR1      | 0.706 | 0.63579641  | 0.412 | 0.63579641  | 0.5   | 0.07  | NA        | 8       |
| VAMP8       | 0.706 | 0.551241137 | 0.412 | 0.551241137 | 0.8   | 0.437 | NA        | 8       |
| TPI1        | 0.706 | 0.533305381 | 0.412 | 0.533305381 | 0.88  | 0.474 | NA        | 8       |
| MT-CO3      | 0.706 | 0.268293024 | 0.412 | 0.268293024 | 1     | 0.994 | NA        | 8       |
| H2AFY       | 0.705 | 0.543675616 | 0.41  | 0.543675616 | 0.66  | 0.228 | NA        | 8       |
| CDC42EP3    | 0.704 | 0.559954221 | 0.408 | 0.559954221 | 0.6   | 0.152 | NA        | 8       |
| POU2F2      | 0.703 | 0.762772322 | 0.406 | 0.762772322 | 0.54  | 0.144 | NA        | 8       |
| CTSD        | 0.703 | 0.606412457 | 0.406 | 0.606412457 | 0.66  | 0.245 | NA        | 8       |
| AP2S1       | 0.703 | 0.603823649 | 0.406 | 0.603823649 | 0.7   | 0.277 | NA        | 8       |
| ATP6V0D1    | 0.703 | 0.602236768 | 0.406 | 0.602236768 | 0.54  | 0.117 | NA        | 8       |
| BLOC1S1     | 0.703 | 0.565342665 | 0.406 | 0.565342665 | 0.8   | 0.402 | NA        | 8       |
| LSP1        | 0.703 | 0.468986388 | 0.406 | 0.468986388 | 0.94  | 0.675 | NA        | 8       |
| CMTM6       | 0.702 | 0.535207231 | 0.404 | 0.535207231 | 0.66  | 0.204 | NA        | 8       |
| ABI3        | 0.701 | 0.669688651 | 0.402 | 0.669688651 | 0.6   | 0.199 | NA        | 8       |
| TUBA1A      | 0.701 | 0.574824351 | 0.402 | 0.574824351 | 0.72  | 0.323 | NA        | 8       |
| HLA-DQA1    | 0.701 | 0.516028862 | 0.402 | 0.516028862 | 0.74  | 0.29  | NA        | 8       |

Table S1 Continued

| Gene_marker | myAUC | Avg_diff    | Power | Avg_logFC   | Pct.1 | Pct.2 | P_val_adj | Cluster |
|-------------|-------|-------------|-------|-------------|-------|-------|-----------|---------|
| HLA-DRA     | 0.97  | 1.802287676 | 0.94  | 1.802287676 | 1     | 0.616 | NA        | 9       |
| CD74        | 0.963 | 1.523332208 | 0.926 | 1.523332208 | 1     | 0.938 | NA        | 9       |
| HLA-DPB1    | 0.938 | 1.290823725 | 0.876 | 1.290823725 | 1     | 0.779 | NA        | 9       |
| CD79A       | 0.895 | 1.377298675 | 0.79  | 1.377298675 | 0.971 | 0.267 | NA        | 9       |
| HLA-DPA1    | 0.883 | 1.180582682 | 0.766 | 1.180582682 | 0.971 | 0.682 | NA        | 9       |
| MEF2C       | 0.874 | 1.437322381 | 0.748 | 1.437322381 | 0.8   | 0.07  | NA        | 9       |
| HLA-DQA2    | 0.861 | 1.095393741 | 0.722 | 1.095393741 | 0.943 | 0.384 | NA        | 9       |
| IGKC        | 0.853 | 0.448295928 | 0.706 | 0.448295928 | 1     | 0.995 | NA        | 9       |
| MS4A1       | 0.852 | 1.193373882 | 0.704 | 1.193373882 | 0.914 | 0.249 | NA        | 9       |
| CD79B       | 0.851 | 0.993824382 | 0.702 | 0.993824382 | 0.971 | 0.31  | NA        | 9       |
| SUB1        | 0.843 | 1.020298531 | 0.686 | 1.020298531 | 0.971 | 0.703 | NA        | 9       |
| HLA-DQB1    | 0.834 | 1.135912876 | 0.668 | 1.135912876 | 0.857 | 0.283 | NA        | 9       |
| LAPTM5      | 0.831 | 0.950190236 | 0.662 | 0.950190236 | 0.943 | 0.706 | NA        | 9       |
| CLECL1      | 0.827 | 0.899005362 | 0.654 | 0.899005362 | 0.8   | 0.116 | NA        | 9       |
| HLA-DRB1    | 0.826 | 0.89917861  | 0.652 | 0.89917861  | 1     | 0.656 | NA        | 9       |
| BLK         | 0.823 | 1.017677452 | 0.646 | 1.017677452 | 0.714 | 0.057 | NA        | 9       |
| HLA-DMB     | 0.813 | 1.038590087 | 0.626 | 1.038590087 | 0.8   | 0.167 | NA        | 9       |
| CD37        | 0.807 | 0.731690298 | 0.614 | 0.731690298 | 1     | 0.727 | NA        | 9       |
| UBE2J1      | 0.802 | 1.035181246 | 0.604 | 1.035181246 | 0.714 | 0.131 | NA        | 9       |
| RPLP1       | 0.802 | 0.373029247 | 0.604 | 0.373029247 | 1     | 1     | NA        | 9       |
| OAZ1        | 0.801 | 0.577225947 | 0.602 | 0.577225947 | 1     | 0.901 | NA        | 9       |
| HLA-DQA1    | 0.8   | 0.970303743 | 0.6   | 0.970303743 | 0.829 | 0.291 | NA        | 9       |
| POU2F2      | 0.796 | 0.902221275 | 0.592 | 0.902221275 | 0.743 | 0.144 | NA        | 9       |
| CPNE5       | 0.794 | 1.405203589 | 0.588 | 1.405203589 | 0.6   | 0.016 | NA        | 9       |
| SNX3        | 0.79  | 0.864487117 | 0.58  | 0.864487117 | 0.886 | 0.456 | NA        | 9       |
| GABARAPL2   | 0.787 | 0.745667136 | 0.574 | 0.745667136 | 0.886 | 0.369 | NA        | 9       |
| ANXA4       | 0.784 | 0.92045491  | 0.568 | 0.92045491  | 0.629 | 0.051 | NA        | 9       |
| BANK1       | 0.777 | 1.145762049 | 0.554 | 1.145762049 | 0.629 | 0.085 | NA        | 9       |
| EEF2        | 0.776 | 0.522022166 | 0.552 | 0.522022166 | 1     | 0.892 | NA        | 9       |

Table S1 Continued

| Gene_marker | myAUC | Avg_diff    | Power | Avg_logFC   | Pct.1 | Pct.2 | P_val_adj | Cluster |
|-------------|-------|-------------|-------|-------------|-------|-------|-----------|---------|
| GNB2L1      | 0.774 | 0.420458952 | 0.548 | 0.420458952 | 1     | 0.983 | NA        | 9       |
| HLA-DMA     | 0.771 | 0.815836231 | 0.542 | 0.815836231 | 0.8   | 0.299 | NA        | 9       |
| GNG7        | 0.765 | 1.191470838 | 0.53  | 1.191470838 | 0.543 | 0.02  | NA        | 9       |
| CCDC50      | 0.764 | 0.872589033 | 0.528 | 0.872589033 | 0.629 | 0.092 | NA        | 9       |
| CD19        | 0.757 | 0.965030779 | 0.514 | 0.965030779 | 0.629 | 0.115 | NA        | 9       |
| LAT2        | 0.751 | 0.960048803 | 0.502 | 0.960048803 | 0.571 | 0.075 | NA        | 9       |
| MT-CO3      | 0.75  | 0.410602597 | 0.5   | 0.410602597 | 1     | 0.994 | NA        | 9       |
| SNX2        | 0.748 | 0.927191253 | 0.496 | 0.927191253 | 0.6   | 0.108 | NA        | 9       |
| CAPG        | 0.747 | 0.923215012 | 0.494 | 0.923215012 | 0.6   | 0.112 | NA        | 9       |
| SPIB        | 0.746 | 0.920681384 | 0.492 | 0.920681384 | 0.571 | 0.075 | NA        | 9       |
| CALM2       | 0.745 | 0.543555456 | 0.49  | 0.543555456 | 1     | 0.714 | NA        | 9       |
| IRF8        | 0.744 | 0.78886217  | 0.488 | 0.78886217  | 0.543 | 0.044 | NA        | 9       |
| JCHAIN      | 0.742 | 0.972853389 | 0.484 | 0.972853389 | 0.571 | 0.121 | NA        | 9       |
| PLAC8       | 0.739 | 1.043250572 | 0.478 | 1.043250572 | 0.657 | 0.197 | NA        | 9       |
| MT-CO1      | 0.736 | 0.33774151  | 0.472 | 0.33774151  | 1     | 0.998 | NA        | 9       |
| LSP1        | 0.732 | 0.542944301 | 0.464 | 0.542944301 | 0.914 | 0.676 | NA        | 9       |
| TKT         | 0.724 | 0.737284673 | 0.448 | 0.737284673 | 0.629 | 0.163 | NA        | 9       |
| SYNGR2      | 0.723 | 0.611715231 | 0.446 | 0.611715231 | 0.686 | 0.204 | NA        | 9       |
| AL928768.3  | 0.722 | 2.16565284  | 0.444 | 2.16565284  | 0.457 | 0.015 | NA        | 9       |
| CRIP1       | 0.722 | 0.937604584 | 0.444 | 0.937604584 | 0.886 | 0.56  | NA        | 9       |
| CD86        | 0.722 | 0.864319519 | 0.444 | 0.864319519 | 0.457 | 0.013 | NA        | 9       |
| CD52        | 0.722 | 0.39674136  | 0.444 | 0.39674136  | 1     | 0.996 | NA        | 9       |
| RPL18A      | 0.722 | 0.283641324 | 0.444 | 0.283641324 | 1     | 1     | NA        | 9       |
| LY86        | 0.721 | 0.901869535 | 0.442 | 0.901869535 | 0.543 | 0.098 | NA        | 9       |
| ZFAND6      | 0.721 | 0.656343756 | 0.442 | 0.656343756 | 0.714 | 0.236 | NA        | 9       |
| GAPT        | 0.72  | 0.789682934 | 0.44  | 0.789682934 | 0.486 | 0.04  | NA        | 9       |
| NAP1L1      | 0.717 | 0.649465155 | 0.434 | 0.649465155 | 0.829 | 0.578 | NA        | 9       |
| HVCN1       | 0.713 | 0.853639775 | 0.426 | 0.853639775 | 0.457 | 0.032 | NA        | 9       |
| SND1        | 0.712 | 0.789407235 | 0.424 | 0.789407235 | 0.514 | 0.088 | NA        | 9       |

Table S1 Continued

| Gene_marker | myAUC | Avg_diff    | Power | Avg_logFC   | Pct.1 | Pct.2 | P_val_adj | Cluster |
|-------------|-------|-------------|-------|-------------|-------|-------|-----------|---------|
| ACP5        | 0.711 | 0.687687046 | 0.422 | 0.687687046 | 0.571 | 0.144 | NA        | 9       |
| CTSH        | 0.71  | 0.643961283 | 0.42  | 0.643961283 | 0.514 | 0.08  | NA        | 9       |
| CIB1        | 0.706 | 0.956834571 | 0.412 | 0.956834571 | 0.886 | 0.461 | NA        | 9       |
| LTB         | 0.703 | 1.059066414 | 0.406 | 1.059066414 | 0.8   | 0.56  | NA        | 9       |
| GPX1        | 0.703 | 0.532845191 | 0.406 | 0.532845191 | 0.743 | 0.326 | NA        | 9       |
| UQCRH       | 0.702 | 0.505231117 | 0.404 | 0.505231117 | 0.857 | 0.527 | NA        | 9       |
| PDLIM1      | 0.701 | 0.558123126 | 0.402 | 0.558123126 | 0.571 | 0.141 | NA        | 9       |
| CYBA        | 0.701 | 0.349461349 | 0.402 | 0.349461349 | 1     | 0.926 | NA        | 9       |

Table S2 Differentially expressed genes in each cell subpopulation

| Gene_marker | P_val     | Avg_logFC   | Pct.1 | Pct.2 | P_val_adj | Cluster |
|-------------|-----------|-------------|-------|-------|-----------|---------|
| GZMK        | 0         | 1.663182738 | 0.796 | 0.211 | 0         | 0       |
| CCL5        | 7.73E-205 | 0.792291655 | 0.997 | 0.816 | 1.21E-200 | 0       |
| CMC1        | 1.01E-151 | 0.972272686 | 0.78  | 0.394 | 1.59E-147 | 0       |
| LYAR        | 2.95E-128 | 0.783510565 | 0.655 | 0.282 | 4.63E-124 | 0       |
| CST7        | 3.46E-95  | 0.477310958 | 0.91  | 0.597 | 5.42E-91  | 0       |
| CD8B        | 3.07E-92  | 0.695031612 | 0.679 | 0.355 | 4.81E-88  | 0       |
| KLRG1       | 1.83E-91  | 0.693846525 | 0.552 | 0.241 | 2.86E-87  | 0       |
| COTL1       | 3.02E-83  | 0.500765291 | 0.843 | 0.611 | 4.73E-79  | 0       |
| SH2D1A      | 6.11E-81  | 0.663805292 | 0.495 | 0.218 | 9.58E-77  | 0       |
| GZMM        | 2.27E-78  | 0.55693349  | 0.696 | 0.406 | 3.56E-74  | 0       |
| GZMA        | 3.66E-77  | 0.47906139  | 0.84  | 0.544 | 5.74E-73  | 0       |
| CD160       | 1.95E-75  | 0.69070374  | 0.384 | 0.134 | 3.06E-71  | 0       |
| CD8A        | 1.70E-69  | 0.532511998 | 0.605 | 0.319 | 2.67E-65  | 0       |
| TRAC        | 4.16E-69  | 0.388435975 | 0.943 | 0.74  | 6.52E-65  | 0       |
| CTSW        | 1.04E-65  | 0.398593657 | 0.81  | 0.513 | 1.63E-61  | 0       |
| HCST        | 2.65E-62  | 0.339944985 | 0.929 | 0.758 | 4.15E-58  | 0       |
| CD3D        | 1.25E-60  | 0.344559655 | 0.955 | 0.772 | 1.97E-56  | 0       |

Table S2 Continued

| Gene_marker | P_val    | Avg_logFC   | Pct.1 | Pct.2 | P_val_adj | Cluster |
|-------------|----------|-------------|-------|-------|-----------|---------|
| IL32        | 1.80E-55 | 0.323735348 | 0.985 | 0.806 | 2.82E-51  | 0       |
| TRGC2       | 3.12E-52 | 0.570372388 | 0.463 | 0.235 | 4.89E-48  | 0       |
| CD3E        | 4.16E-51 | 0.354669634 | 0.863 | 0.651 | 6.52E-47  | 0       |
| CCL4        | 1.16E-47 | 0.779671224 | 0.589 | 0.382 | 1.82E-43  | 0       |
| CD7         | 8.91E-46 | 0.408841361 | 0.57  | 0.344 | 1.40E-41  | 0       |
| TRBC2       | 1.43E-42 | 0.347870338 | 0.884 | 0.791 | 2.23E-38  | 0       |
| FYB         | 6.51E-42 | 0.381058016 | 0.66  | 0.466 | 1.02E-37  | 0       |
| ZFP36L2     | 1.25E-41 | 0.321190051 | 0.874 | 0.762 | 1.96E-37  | 0       |
| CD2         | 3.06E-40 | 0.344834621 | 0.743 | 0.548 | 4.80E-36  | 0       |
| TRAT1       | 3.43E-36 | 0.405250483 | 0.399 | 0.218 | 5.38E-32  | 0       |
| FYN         | 2.57E-31 | 0.388209133 | 0.457 | 0.282 | 4.03E-27  | 0       |
| GPR171      | 2.61E-31 | 0.391666116 | 0.307 | 0.153 | 4.08E-27  | 0       |
| ITGB2       | 4.68E-31 | 0.271214138 | 0.779 | 0.625 | 7.34E-27  | 0       |
| PTPRC       | 7.16E-28 | 0.266517589 | 0.874 | 0.782 | 1.12E-23  | 0       |
| CD3G        | 2.44E-27 | 0.275904375 | 0.659 | 0.475 | 3.82E-23  | 0       |
| CD27        | 6.18E-27 | 0.377873882 | 0.495 | 0.344 | 9.69E-23  | 0       |
| GUK1        | 3.14E-26 | 0.283921983 | 0.706 | 0.59  | 4.92E-22  | 0       |
| PPP2R5C     | 1.34E-25 | 0.319855699 | 0.638 | 0.501 | 2.10E-21  | 0       |
| NUCB2       | 1.95E-24 | 0.392863916 | 0.288 | 0.161 | 3.06E-20  | 0       |
| RARRES3     | 3.05E-24 | 0.282311802 | 0.689 | 0.572 | 4.78E-20  | 0       |
| LAG3        | 2.79E-23 | 0.333306563 | 0.284 | 0.153 | 4.37E-19  | 0       |
| LAT         | 5.80E-23 | 0.288806499 | 0.619 | 0.474 | 9.09E-19  | 0       |
| GIMAP4      | 1.63E-22 | 0.305962773 | 0.547 | 0.402 | 2.56E-18  | 0       |
| PRKCH       | 7.18E-22 | 0.302303953 | 0.381 | 0.235 | 1.13E-17  | 0       |
| MYO1F       | 8.76E-22 | 0.272023638 | 0.582 | 0.434 | 1.37E-17  | 0       |
| CLEC2B      | 2.10E-19 | 0.300140315 | 0.417 | 0.282 | 3.30E-15  | 0       |
| MATK        | 3.43E-18 | 0.274153428 | 0.26  | 0.146 | 5.37E-14  | 0       |
| ARL4C       | 5.40E-17 | 0.258342628 | 0.401 | 0.275 | 8.47E-13  | 0       |
| CD96        | 6.60E-16 | 0.251941128 | 0.253 | 0.149 | 1.03E-11  | 0       |
| LINC00861   | 7.30E-16 | 0.256587849 | 0.352 | 0.236 | 1.14E-11  | 0       |

Table S2 Continued

| Gene_marker | P_val     | Avg_logFC   | Pct.1 | Pct.2 | P_val_adj | Cluster |
|-------------|-----------|-------------|-------|-------|-----------|---------|
| MT1X        | 6.63E-15  | 0.258190879 | 0.259 | 0.157 | 1.04E-10  | 0       |
| STOM        | 2.43E-14  | 0.26854211  | 0.311 | 0.204 | 3.81E-10  | 0       |
| TC2N        | 1.30E-13  | 0.260946776 | 0.278 | 0.181 | 2.04E-09  | 0       |
| LINC00152   | 2.61E-13  | 0.284821391 | 0.37  | 0.272 | 4.08E-09  | 0       |
| CNN2        | 1.01E-12  | 0.256740758 | 0.509 | 0.421 | 1.58E-08  | 0       |
| DENND2D     | 2.19E-12  | 0.266205163 | 0.346 | 0.256 | 3.44E-08  | 0       |
| ATM         | 3.50E-12  | 0.258628    | 0.336 | 0.243 | 5.49E-08  | 0       |
| CCDC109B    | 1.31E-11  | 0.253559679 | 0.279 | 0.194 | 2.06E-07  | 0       |
| GZMH        | 0         | 1.510234259 | 0.969 | 0.444 | 0         | 1       |
| FGFBP2      | 4.52E-289 | 1.485499676 | 0.765 | 0.187 | 7.09E-285 | 1       |
| NKG7        | 2.96E-264 | 1.05303263  | 0.999 | 0.785 | 4.63E-260 | 1       |
| GZMB        | 7.89E-236 | 1.285614678 | 0.727 | 0.207 | 1.24E-231 | 1       |
| B2M         | 4.44E-184 | 0.303392763 | 1     | 1     | 6.95E-180 | 1       |
| CST7        | 5.53E-140 | 0.710949366 | 0.951 | 0.617 | 8.66E-136 | 1       |
| KLRD1       | 1.27E-139 | 0.903127928 | 0.774 | 0.36  | 2.00E-135 | 1       |
| PRF1        | 1.00E-135 | 0.89105827  | 0.693 | 0.296 | 1.57E-131 | 1       |
| GZMA        | 2.72E-128 | 0.736590732 | 0.915 | 0.553 | 4.26E-124 | 1       |
| CCL5        | 8.99E-124 | 0.623697673 | 0.998 | 0.835 | 1.41E-119 | 1       |
| SH3BGRL3    | 1.45E-119 | 0.544690885 | 0.991 | 0.902 | 2.27E-115 | 1       |
| S100A4      | 7.12E-117 | 0.602483617 | 0.984 | 0.841 | 1.12E-112 | 1       |
| CTSW        | 1.49E-110 | 0.675718729 | 0.862 | 0.529 | 2.33E-106 | 1       |
| ACTB        | 6.64E-105 | 0.454706549 | 1     | 1     | 1.04E-100 | 1       |
| CD3D        | 7.66E-94  | 0.515111944 | 0.973 | 0.787 | 1.20E-89  | 1       |
| GNLY        | 2.97E-87  | 0.682172946 | 0.647 | 0.371 | 4.66E-83  | 1       |
| S1PR5       | 1.44E-84  | 0.705348049 | 0.375 | 0.11  | 2.26E-80  | 1       |
| PLEK        | 5.86E-84  | 0.741920134 | 0.557 | 0.264 | 9.19E-80  | 1       |
| ID2         | 5.87E-84  | 0.653871191 | 0.684 | 0.366 | 9.20E-80  | 1       |
| IL32        | 2.07E-81  | 0.44979189  | 0.992 | 0.822 | 3.25E-77  | 1       |
| HCST        | 1.35E-79  | 0.510270528 | 0.924 | 0.777 | 2.12E-75  | 1       |
| HLA-C       | 4.23E-79  | 0.316764661 | 1     | 0.998 | 6.62E-75  | 1       |

Table S2 Continued

| Gene_marker | P_val    | Avg_logFC   | Pct.1 | Pct.2 | P_val_adj | Cluster |
|-------------|----------|-------------|-------|-------|-----------|---------|
| LAIR2       | 1.95E-76 | 0.696689934 | 0.288 | 0.068 | 3.06E-72  | 1       |
| ADGRG1      | 1.64E-73 | 0.662468629 | 0.3   | 0.079 | 2.57E-69  | 1       |
| RAP1B       | 4.09E-71 | 0.594501307 | 0.705 | 0.469 | 6.41E-67  | 1       |
| CX3CR1      | 1.02E-68 | 0.628501433 | 0.26  | 0.063 | 1.60E-64  | 1       |
| S100A6      | 2.19E-68 | 0.406468499 | 0.952 | 0.814 | 3.43E-64  | 1       |
| FCRL6       | 3.79E-66 | 0.618644711 | 0.337 | 0.108 | 5.94E-62  | 1       |
| CD8A        | 6.50E-65 | 0.615468922 | 0.62  | 0.345 | 1.02E-60  | 1       |
| PFN1        | 2.16E-62 | 0.312470139 | 0.999 | 0.991 | 3.39E-58  | 1       |
| TBX21       | 2.19E-62 | 0.586491814 | 0.313 | 0.099 | 3.44E-58  | 1       |
| LITAF       | 1.89E-61 | 0.550116009 | 0.716 | 0.511 | 2.97E-57  | 1       |
| SPON2       | 3.45E-59 | 0.654701489 | 0.342 | 0.125 | 5.40E-55  | 1       |
| AC092580.4  | 7.18E-56 | 0.564226619 | 0.618 | 0.373 | 1.12E-51  | 1       |
| C12orf75    | 6.61E-53 | 0.575935314 | 0.6   | 0.384 | 1.04E-48  | 1       |
| CFL1        | 8.26E-53 | 0.328535831 | 0.978 | 0.956 | 1.30E-48  | 1       |
| CD99        | 1.34E-52 | 0.437769864 | 0.829 | 0.673 | 2.10E-48  | 1       |
| CD8B        | 1.75E-51 | 0.511671535 | 0.647 | 0.399 | 2.74E-47  | 1       |
| ARPC2       | 8.70E-51 | 0.420652206 | 0.887 | 0.78  | 1.36E-46  | 1       |
| CD3G        | 1.08E-47 | 0.502129033 | 0.681 | 0.488 | 1.69E-43  | 1       |
| GZMM        | 3.16E-47 | 0.453369186 | 0.677 | 0.442 | 4.96E-43  | 1       |
| ZEB2        | 3.52E-47 | 0.623468094 | 0.418 | 0.209 | 5.51E-43  | 1       |
| SRGN        | 6.62E-45 | 0.36324483  | 0.831 | 0.675 | 1.04E-40  | 1       |
| ITGB2       | 2.78E-44 | 0.418807369 | 0.801 | 0.635 | 4.36E-40  | 1       |
| CALM1       | 5.32E-43 | 0.372636323 | 0.856 | 0.727 | 8.34E-39  | 1       |
| ANXA1       | 8.36E-43 | 0.447529482 | 0.644 | 0.435 | 1.31E-38  | 1       |
| HLA-E       | 1.75E-41 | 0.290645683 | 0.963 | 0.93  | 2.74E-37  | 1       |
| CD3E        | 2.22E-40 | 0.356234712 | 0.854 | 0.676 | 3.48E-36  | 1       |
| CCL4        | 3.69E-40 | 0.268213033 | 0.62  | 0.394 | 5.79E-36  | 1       |
| CD2         | 1.48E-39 | 0.391746637 | 0.752 | 0.566 | 2.33E-35  | 1       |
| EMP3        | 7.31E-38 | 0.377226858 | 0.803 | 0.658 | 1.15E-33  | 1       |
| MYL12A      | 5.14E-37 | 0.299101414 | 0.946 | 0.88  | 8.05E-33  | 1       |



Table S2 Continued

| Gene_marker | P_val    | Avg_logFC   | Pct.1 | Pct.2 | P_val_adj | Cluster |
|-------------|----------|-------------|-------|-------|-----------|---------|
| ACTG1       | 3.04E-35 | 0.311916072 | 0.942 | 0.905 | 4.76E-31  | 1       |
| BIN2        | 5.11E-34 | 0.430621826 | 0.569 | 0.395 | 8.00E-30  | 1       |
| TRAC        | 5.61E-34 | 0.289308701 | 0.936 | 0.763 | 8.80E-30  | 1       |
| LSP1        | 8.29E-34 | 0.3406872   | 0.785 | 0.647 | 1.30E-29  | 1       |
| MYO1F       | 1.52E-32 | 0.409722045 | 0.615 | 0.439 | 2.38E-28  | 1       |
| LGALS1      | 4.36E-32 | 0.439668558 | 0.578 | 0.404 | 6.84E-28  | 1       |
| EFHD2       | 5.30E-32 | 0.482308651 | 0.281 | 0.131 | 8.30E-28  | 1       |
| CTSC        | 7.90E-32 | 0.46926035  | 0.504 | 0.344 | 1.24E-27  | 1       |
| CLEC2D      | 1.22E-30 | 0.396091928 | 0.636 | 0.48  | 1.92E-26  | 1       |
| APMAP       | 9.37E-30 | 0.449172187 | 0.405 | 0.245 | 1.47E-25  | 1       |
| TRGC2       | 1.20E-29 | 0.440859585 | 0.446 | 0.264 | 1.87E-25  | 1       |
| C9orf142    | 2.26E-29 | 0.398479932 | 0.546 | 0.389 | 3.55E-25  | 1       |
| CHST12      | 9.66E-29 | 0.43992547  | 0.407 | 0.248 | 1.51E-24  | 1       |
| RARRES3     | 6.36E-28 | 0.341407664 | 0.712 | 0.578 | 9.97E-24  | 1       |
| ABI3        | 1.23E-26 | 0.438392425 | 0.316 | 0.171 | 1.93E-22  | 1       |
| CLIC3       | 2.42E-25 | 0.448915835 | 0.304 | 0.162 | 3.79E-21  | 1       |
| SAMD3       | 5.68E-25 | 0.427900147 | 0.358 | 0.213 | 8.90E-21  | 1       |
| RAC2        | 4.31E-23 | 0.30531938  | 0.733 | 0.64  | 6.76E-19  | 1       |
| SPN         | 4.40E-23 | 0.42635224  | 0.359 | 0.222 | 6.90E-19  | 1       |
| GIMAP7      | 1.29E-22 | 0.312579019 | 0.652 | 0.505 | 2.03E-18  | 1       |
| PYHIN1      | 2.39E-22 | 0.345240402 | 0.481 | 0.334 | 3.75E-18  | 1       |
| MT2A        | 3.46E-22 | 0.36307764  | 0.58  | 0.442 | 5.43E-18  | 1       |
| IL2RG       | 7.84E-22 | 0.286605629 | 0.735 | 0.649 | 1.23E-17  | 1       |
| PPP1CA      | 1.82E-21 | 0.297460345 | 0.697 | 0.6   | 2.85E-17  | 1       |
| PPP1R18     | 1.95E-21 | 0.362945369 | 0.496 | 0.374 | 3.06E-17  | 1       |
| FGR         | 6.48E-21 | 0.361399684 | 0.29  | 0.161 | 1.02E-16  | 1       |
| CAP1        | 1.05E-20 | 0.335089402 | 0.59  | 0.493 | 1.64E-16  | 1       |
| LAG3        | 2.20E-20 | 0.365216697 | 0.292 | 0.165 | 3.44E-16  | 1       |
| BATF        | 2.71E-20 | 0.385519347 | 0.305 | 0.182 | 4.24E-16  | 1       |
| MYL12B      | 7.00E-19 | 0.255398051 | 0.786 | 0.714 | 1.10E-14  | 1       |

Table S2 Continued

| Gene_marker | P_val    | Avg_logFC   | Pct.1 | Pct.2 | P_val_adj | Cluster |
|-------------|----------|-------------|-------|-------|-----------|---------|
| CLIC1       | 8.00E-19 | 0.267595512 | 0.735 | 0.655 | 1.25E-14  | 1       |
| FAM49B      | 3.02E-18 | 0.317768639 | 0.552 | 0.452 | 4.74E-14  | 1       |
| GIMAP4      | 8.41E-18 | 0.303572633 | 0.54  | 0.419 | 1.32E-13  | 1       |
| LY6E        | 1.00E-17 | 0.26816915  | 0.69  | 0.602 | 1.57E-13  | 1       |
| DSTN        | 2.57E-17 | 0.346963432 | 0.395 | 0.278 | 4.03E-13  | 1       |
| CCND3       | 3.81E-17 | 0.29830062  | 0.533 | 0.424 | 5.97E-13  | 1       |
| PATL2       | 3.06E-16 | 0.352714478 | 0.275 | 0.166 | 4.80E-12  | 1       |
| SLC9A3R1    | 2.03E-15 | 0.32917303  | 0.437 | 0.335 | 3.18E-11  | 1       |
| ARL6IP1     | 2.32E-15 | 0.267699726 | 0.513 | 0.429 | 3.63E-11  | 1       |
| KLRG1       | 7.05E-15 | 0.284817849 | 0.436 | 0.308 | 1.10E-10  | 1       |
| CD48        | 9.49E-15 | 0.269099648 | 0.604 | 0.516 | 1.49E-10  | 1       |
| ARPC5L      | 1.68E-14 | 0.33690671  | 0.396 | 0.293 | 2.64E-10  | 1       |
| FKBP11      | 2.86E-14 | 0.28541183  | 0.352 | 0.242 | 4.48E-10  | 1       |
| YWHAQ       | 5.31E-14 | 0.291282964 | 0.534 | 0.467 | 8.33E-10  | 1       |
| LCP1        | 5.50E-14 | 0.286959033 | 0.518 | 0.434 | 8.62E-10  | 1       |
| OSTF1       | 7.26E-14 | 0.316451766 | 0.389 | 0.293 | 1.14E-09  | 1       |
| HOPX        | 9.02E-14 | 0.286385648 | 0.318 | 0.209 | 1.41E-09  | 1       |
| XBP1        | 1.27E-13 | 0.277137769 | 0.407 | 0.298 | 1.99E-09  | 1       |
| STOM        | 1.31E-13 | 0.286538685 | 0.316 | 0.213 | 2.05E-09  | 1       |
| ARPC5       | 1.62E-13 | 0.28102033  | 0.571 | 0.507 | 2.53E-09  | 1       |
| MATK        | 1.95E-13 | 0.295494043 | 0.256 | 0.159 | 3.06E-09  | 1       |
| VAMP5       | 4.19E-13 | 0.311826054 | 0.373 | 0.281 | 6.57E-09  | 1       |
| RNF167      | 5.31E-13 | 0.292356045 | 0.412 | 0.315 | 8.33E-09  | 1       |
| TPST2       | 9.25E-13 | 0.30313541  | 0.323 | 0.227 | 1.45E-08  | 1       |
| ARL6IP5     | 9.38E-13 | 0.25278143  | 0.632 | 0.582 | 1.47E-08  | 1       |
| LBH         | 1.20E-12 | 0.284177622 | 0.414 | 0.323 | 1.89E-08  | 1       |
| FLNA        | 1.31E-12 | 0.286177262 | 0.363 | 0.268 | 2.05E-08  | 1       |
| DBI         | 1.64E-12 | 0.270347676 | 0.535 | 0.463 | 2.57E-08  | 1       |
| CLEC2B      | 2.52E-12 | 0.308722612 | 0.392 | 0.303 | 3.94E-08  | 1       |
| MBP         | 1.40E-11 | 0.259774827 | 0.359 | 0.27  | 2.20E-07  | 1       |

Table S2 Continued

| Gene_marker | P_val       | Avg_logFC   | Pct.1 | Pct.2 | P_val_adj   | Cluster |
|-------------|-------------|-------------|-------|-------|-------------|---------|
| LINC00152   | 2.49E-11    | 0.278805237 | 0.37  | 0.282 | 3.91E-07    | 1       |
| MYO1G       | 4.49E-11    | 0.264962519 | 0.409 | 0.326 | 7.03E-07    | 1       |
| CD247       | 6.15E-11    | 0.255839601 | 0.408 | 0.319 | 9.65E-07    | 1       |
| CYTH4       | 7.28E-11    | 0.272416692 | 0.276 | 0.191 | 1.14E-06    | 1       |
| PTP4A2      | 1.15E-10    | 0.277677644 | 0.407 | 0.335 | 1.80E-06    | 1       |
| SUPT4H1     | 2.02E-10    | 0.274555693 | 0.336 | 0.259 | 3.16E-06    | 1       |
| GRAP2       | 2.45E-10    | 0.270645182 | 0.252 | 0.169 | 3.84E-06    | 1       |
| RORA        | 2.51E-10    | 0.281195376 | 0.327 | 0.244 | 3.93E-06    | 1       |
| APOBEC3G    | 2.93E-10    | 0.289023833 | 0.359 | 0.282 | 4.59E-06    | 1       |
| PLAC8       | 3.50E-10    | 0.260161766 | 0.266 | 0.181 | 5.48E-06    | 1       |
| SCP2        | 4.16E-10    | 0.257006692 | 0.438 | 0.375 | 6.52E-06    | 1       |
| RAB29       | 6.45E-10    | 0.26034471  | 0.255 | 0.177 | 1.01E-05    | 1       |
| ARRB2       | 4.76E-09    | 0.268823176 | 0.31  | 0.237 | 7.46E-05    | 1       |
| C5orf56     | 4.37E-08    | 0.267615797 | 0.299 | 0.23  | 0.000685569 | 1       |
| TRBC1       | 5.01E-08    | 0.259964517 | 0.531 | 0.468 | 0.000785336 | 1       |
| KLRB1       | 0.000315036 | 0.378719672 | 0.262 | 0.218 | 1           | 1       |
| C1orf56     | 0.008639527 | 0.258011862 | 0.3   | 0.277 | 1           | 1       |
| LTB         | 2.88E-215   | 1.262633582 | 0.926 | 0.474 | 4.51E-211   | 2       |
| EEF1A1      | 2.19E-145   | 0.346447159 | 1     | 1     | 3.43E-141   | 2       |
| IL7R        | 1.31E-142   | 1.01777479  | 0.733 | 0.281 | 2.06E-138   | 2       |
| RPL10       | 3.98E-141   | 0.346185404 | 1     | 1     | 6.24E-137   | 2       |
| RPLP1       | 1.45E-136   | 0.400891514 | 1     | 1     | 2.28E-132   | 2       |
| RPL13       | 1.76E-134   | 0.319839963 | 1     | 1     | 2.76E-130   | 2       |
| RPL32       | 6.83E-126   | 0.33152658  | 1     | 1     | 1.07E-121   | 2       |
| RPS25       | 2.22E-123   | 0.386838669 | 1     | 0.998 | 3.49E-119   | 2       |
| RPL34       | 2.53E-119   | 0.357749148 | 1     | 1     | 3.97E-115   | 2       |
| MAL         | 9.11E-119   | 0.788375569 | 0.279 | 0.031 | 1.43E-114   | 2       |
| RPS6        | 4.12E-117   | 0.32181637  | 1     | 1     | 6.46E-113   | 2       |
| RPL21       | 1.85E-109   | 0.299862331 | 1     | 1     | 2.91E-105   | 2       |
| LDHB        | 1.19E-106   | 0.813717458 | 0.832 | 0.53  | 1.86E-102   | 2       |

Table S2 Continued

| Gene_marker | P_val     | Avg_logFC   | Pct.1 | Pct.2 | P_val_adj | Cluster |
|-------------|-----------|-------------|-------|-------|-----------|---------|
| RPS8        | 3.92E-106 | 0.339865853 | 1     | 0.999 | 6.14E-102 | 2       |
| RPS18       | 6.88E-101 | 0.28150499  | 1     | 1     | 1.08E-96  | 2       |
| RPL36       | 9.09E-101 | 0.320563065 | 1     | 1     | 1.42E-96  | 2       |
| TPT1        | 5.47E-99  | 0.4321877   | 0.996 | 0.977 | 8.58E-95  | 2       |
| RPS27A      | 3.08E-98  | 0.299561708 | 1     | 1     | 4.84E-94  | 2       |
| FXYD5       | 1.95E-93  | 0.7250378   | 0.825 | 0.555 | 3.06E-89  | 2       |
| RPS3A       | 2.36E-87  | 0.304044778 | 1     | 1     | 3.70E-83  | 2       |
| RPL18A      | 1.46E-86  | 0.277247751 | 1     | 1     | 2.29E-82  | 2       |
| RPL39       | 3.28E-86  | 0.27774111  | 1     | 1     | 5.14E-82  | 2       |
| LEF1        | 1.42E-83  | 0.721456439 | 0.321 | 0.072 | 2.22E-79  | 2       |
| RPL11       | 1.42E-83  | 0.259302292 | 1     | 1     | 2.23E-79  | 2       |
| RPL36A      | 1.26E-82  | 0.374102656 | 0.999 | 0.986 | 1.98E-78  | 2       |
| RPS12       | 1.54E-82  | 0.286011451 | 1     | 1     | 2.41E-78  | 2       |
| SELL        | 2.60E-81  | 0.786729762 | 0.523 | 0.199 | 4.07E-77  | 2       |
| ITGB1       | 1.28E-80  | 0.761012071 | 0.605 | 0.281 | 2.00E-76  | 2       |
| RPL9        | 2.11E-76  | 0.321438143 | 1     | 0.996 | 3.31E-72  | 2       |
| RPL12       | 1.09E-72  | 0.275941409 | 0.999 | 0.999 | 1.71E-68  | 2       |
| RPL35A      | 2.85E-70  | 0.255497185 | 1     | 1     | 4.47E-66  | 2       |
| RPS13       | 1.47E-69  | 0.302885047 | 0.999 | 0.997 | 2.30E-65  | 2       |
| RPL31       | 3.51E-69  | 0.272156715 | 1     | 0.999 | 5.49E-65  | 2       |
| RPS4X       | 1.83E-66  | 0.259570207 | 1     | 0.999 | 2.87E-62  | 2       |
| RPL7        | 2.69E-64  | 0.281083412 | 1     | 0.999 | 4.22E-60  | 2       |
| RPL30       | 1.43E-62  | 0.264564495 | 1     | 0.998 | 2.24E-58  | 2       |
| TNFRSF25    | 3.25E-62  | 0.577650835 | 0.294 | 0.08  | 5.10E-58  | 2       |
| RPL10A      | 4.99E-62  | 0.290855477 | 1     | 0.992 | 7.83E-58  | 2       |
| RPL4        | 2.57E-60  | 0.321465258 | 0.981 | 0.977 | 4.02E-56  | 2       |
| TMEM123     | 6.59E-60  | 0.610694636 | 0.546 | 0.259 | 1.03E-55  | 2       |
| RPL8        | 2.79E-55  | 0.275566392 | 0.999 | 0.992 | 4.38E-51  | 2       |
| KLRB1       | 2.43E-54  | 0.861815174 | 0.431 | 0.179 | 3.81E-50  | 2       |
| RPL6        | 9.21E-53  | 0.250558711 | 1     | 0.997 | 1.44E-48  | 2       |

Table S2 Continued

| Gene_marker | P_val    | Avg_logFC   | Pct.1 | Pct.2 | P_val_adj | Cluster |
|-------------|----------|-------------|-------|-------|-----------|---------|
| EIF3E       | 1.24E-52 | 0.434338504 | 0.91  | 0.773 | 1.95E-48  | 2       |
| GPR183      | 4.06E-43 | 0.532258103 | 0.311 | 0.116 | 6.36E-39  | 2       |
| RPL22       | 4.06E-40 | 0.277875585 | 0.99  | 0.968 | 6.37E-36  | 2       |
| HINT1       | 5.81E-40 | 0.379461217 | 0.881 | 0.778 | 9.11E-36  | 2       |
| GSTK1       | 2.59E-39 | 0.450707259 | 0.739 | 0.542 | 4.06E-35  | 2       |
| BIRC3       | 3.47E-38 | 0.545228207 | 0.302 | 0.121 | 5.44E-34  | 2       |
| RPLP0       | 1.51E-37 | 0.29559465  | 0.981 | 0.965 | 2.36E-33  | 2       |
| SNHG25      | 4.36E-37 | 0.442382149 | 0.766 | 0.621 | 6.83E-33  | 2       |
| CORO1B      | 1.94E-36 | 0.603431315 | 0.404 | 0.208 | 3.04E-32  | 2       |
| GATA3       | 1.06E-32 | 0.466134535 | 0.265 | 0.106 | 1.66E-28  | 2       |
| PABPC1      | 1.07E-31 | 0.284868051 | 0.948 | 0.899 | 1.68E-27  | 2       |
| PIK3IP1     | 5.62E-30 | 0.472942649 | 0.39  | 0.207 | 8.80E-26  | 2       |
| S100A11     | 2.26E-29 | 0.365317694 | 0.587 | 0.378 | 3.54E-25  | 2       |
| NOSIP       | 1.32E-28 | 0.537037679 | 0.44  | 0.27  | 2.07E-24  | 2       |
| TRAT1       | 1.76E-28 | 0.401255649 | 0.434 | 0.236 | 2.75E-24  | 2       |
| TRADD       | 2.41E-27 | 0.453524438 | 0.36  | 0.194 | 3.78E-23  | 2       |
| EEF2        | 3.14E-27 | 0.264093201 | 0.934 | 0.883 | 4.92E-23  | 2       |
| JUNB        | 4.06E-26 | 0.544400181 | 0.8   | 0.715 | 6.36E-22  | 2       |
| CD82        | 7.20E-25 | 0.367119619 | 0.274 | 0.128 | 1.13E-20  | 2       |
| TCF7        | 2.45E-23 | 0.388684173 | 0.334 | 0.18  | 3.84E-19  | 2       |
| SARAF       | 2.91E-23 | 0.331337141 | 0.796 | 0.674 | 4.57E-19  | 2       |
| NDFIP1      | 2.96E-23 | 0.399854168 | 0.412 | 0.249 | 4.64E-19  | 2       |
| CRIP1       | 3.08E-22 | 0.416879014 | 0.675 | 0.535 | 4.82E-18  | 2       |
| ITM2A       | 1.59E-21 | 0.532890673 | 0.48  | 0.324 | 2.49E-17  | 2       |
| PLP2        | 1.69E-21 | 0.420811315 | 0.354 | 0.207 | 2.65E-17  | 2       |
| GLTSCR2     | 2.79E-20 | 0.258384393 | 0.884 | 0.793 | 4.37E-16  | 2       |
| C1orf162    | 5.50E-20 | 0.356962598 | 0.267 | 0.135 | 8.62E-16  | 2       |
| LEPROTL1    | 1.78E-19 | 0.365324806 | 0.422 | 0.268 | 2.79E-15  | 2       |
| RPS4Y1      | 1.04E-18 | 0.29966858  | 0.859 | 0.825 | 1.63E-14  | 2       |
| HSPA8       | 1.52E-18 | 0.311713677 | 0.702 | 0.576 | 2.38E-14  | 2       |

Table S2 Continued

| Gene_marker | P_val     | Avg_logFC   | Pct.1 | Pct.2 | P_val_adj   | Cluster |
|-------------|-----------|-------------|-------|-------|-------------|---------|
| LIMS1       | 3.26E-18  | 0.359770069 | 0.262 | 0.141 | 5.11E-14    | 2       |
| CYLD        | 6.33E-18  | 0.323559757 | 0.283 | 0.153 | 9.93E-14    | 2       |
| EEF1B2      | 6.58E-18  | 0.257721603 | 0.863 | 0.788 | 1.03E-13    | 2       |
| S100A10     | 9.47E-16  | 0.286797044 | 0.708 | 0.575 | 1.48E-11    | 2       |
| VIM         | 2.06E-15  | 0.287442664 | 0.672 | 0.543 | 3.23E-11    | 2       |
| TRBC1       | 4.17E-15  | 0.421404073 | 0.591 | 0.456 | 6.53E-11    | 2       |
| CD44        | 9.73E-14  | 0.298727822 | 0.528 | 0.396 | 1.52E-09    | 2       |
| EVI2B       | 2.45E-13  | 0.299530656 | 0.543 | 0.423 | 3.84E-09    | 2       |
| TNFAIP3     | 4.45E-13  | 0.308743337 | 0.297 | 0.185 | 6.98E-09    | 2       |
| NBEAL1      | 9.12E-12  | 0.262139978 | 0.551 | 0.432 | 1.43E-07    | 2       |
| FYB         | 1.38E-11  | 0.279472837 | 0.625 | 0.502 | 2.17E-07    | 2       |
| SNHG8       | 1.67E-11  | 0.250141841 | 0.379 | 0.262 | 2.62E-07    | 2       |
| PBXIP1      | 1.30E-10  | 0.251395413 | 0.302 | 0.199 | 2.03E-06    | 2       |
| NDUFS5      | 5.70E-10  | 0.251554564 | 0.521 | 0.42  | 8.94E-06    | 2       |
| SPOCK2      | 8.03E-10  | 0.293095125 | 0.333 | 0.236 | 1.26E-05    | 2       |
| PPP1R2      | 6.98E-09  | 0.254685517 | 0.444 | 0.35  | 0.000109416 | 2       |
| RGS1        | 4.20E-06  | 0.291544858 | 0.262 | 0.193 | 0.065864362 | 2       |
| IGLC6       | 0         | 2.374780226 | 0.88  | 0.066 | 0           | 3       |
| MS4A1       | 0         | 2.241975953 | 0.951 | 0.144 | 0           | 3       |
| IGLC7       | 0         | 2.212569393 | 0.909 | 0.122 | 0           | 3       |
| CD79A       | 0         | 2.108262151 | 0.956 | 0.164 | 0           | 3       |
| CCND1       | 0         | 2.014724192 | 0.874 | 0.101 | 0           | 3       |
| CD79B       | 0         | 1.996487639 | 0.953 | 0.215 | 0           | 3       |
| VPREB3      | 0         | 1.935116145 | 0.852 | 0.09  | 0           | 3       |
| EGR1        | 0         | 1.78657996  | 0.796 | 0.109 | 0           | 3       |
| IGLC3       | 0         | 1.661713956 | 0.996 | 0.412 | 0           | 3       |
| SMIM14      | 0         | 1.644623051 | 0.749 | 0.097 | 0           | 3       |
| CD24        | 0         | 1.474685646 | 0.638 | 0.049 | 0           | 3       |
| IGLC2       | 3.70E-292 | 1.568590115 | 1     | 0.939 | 5.79E-288   | 3       |
| BTG2        | 1.43E-282 | 1.72931512  | 0.882 | 0.227 | 2.23E-278   | 3       |

Table S2 Continued

| Gene_marker   | P_val     | Avg_logFC   | Pct.1 | Pct.2 | P_val_adj | Cluster |
|---------------|-----------|-------------|-------|-------|-----------|---------|
| IGHM          | 9.18E-268 | 1.031200992 | 0.951 | 0.378 | 1.44E-263 | 3       |
| RP5-887A10.1  | 1.21E-262 | 1.408687628 | 0.506 | 0.035 | 1.90E-258 | 3       |
| CD74          | 6.62E-261 | 1.326480013 | 1     | 0.928 | 1.04E-256 | 3       |
| HLA-DRA       | 3.63E-257 | 1.679595904 | 0.998 | 0.558 | 5.69E-253 | 3       |
| ARHGAP24      | 4.64E-257 | 1.171619277 | 0.503 | 0.036 | 7.28E-253 | 3       |
| TNFRSF13C     | 9.92E-254 | 1.307013475 | 0.579 | 0.063 | 1.56E-249 | 3       |
| FAM129C       | 1.69E-250 | 1.186769319 | 0.506 | 0.04  | 2.66E-246 | 3       |
| CD9           | 3.70E-245 | 1.245715836 | 0.512 | 0.044 | 5.80E-241 | 3       |
| GNG11         | 3.89E-242 | 1.181735457 | 0.497 | 0.04  | 6.11E-238 | 3       |
| FCRL2         | 1.32E-237 | 1.183046235 | 0.514 | 0.047 | 2.07E-233 | 3       |
| LY86          | 2.58E-235 | 1.095702368 | 0.488 | 0.04  | 4.05E-231 | 3       |
| TCL1A         | 1.01E-229 | 1.13480931  | 0.47  | 0.036 | 1.58E-225 | 3       |
| IGHD          | 2.60E-226 | 1.126875383 | 0.49  | 0.044 | 4.08E-222 | 3       |
| SOX11         | 1.65E-224 | 1.289088914 | 0.421 | 0.026 | 2.59E-220 | 3       |
| RP11-231C14.7 | 5.06E-221 | 1.124857811 | 0.475 | 0.042 | 7.93E-217 | 3       |
| CD69          | 1.36E-220 | 1.595866207 | 0.958 | 0.55  | 2.14E-216 | 3       |
| CLECL1        | 4.66E-211 | 1.141155999 | 0.514 | 0.06  | 7.31E-207 | 3       |
| MARCKS        | 5.02E-199 | 1.017590781 | 0.426 | 0.037 | 7.87E-195 | 3       |
| RHOB          | 1.93E-188 | 1.260208226 | 0.479 | 0.06  | 3.03E-184 | 3       |
| CD19          | 3.49E-186 | 1.085021295 | 0.481 | 0.061 | 5.48E-182 | 3       |
| IER2          | 6.26E-184 | 1.481617247 | 0.925 | 0.522 | 9.81E-180 | 3       |
| RALGPS2       | 3.91E-180 | 0.992476462 | 0.41  | 0.04  | 6.13E-176 | 3       |
| MARCKSL1      | 1.40E-171 | 1.185481393 | 0.672 | 0.169 | 2.19E-167 | 3       |
| H3F3B         | 1.93E-171 | 0.978617323 | 0.991 | 0.953 | 3.02E-167 | 3       |
| FADS3         | 8.76E-169 | 0.995015975 | 0.413 | 0.046 | 1.37E-164 | 3       |
| MDK           | 9.55E-169 | 1.241618879 | 0.448 | 0.057 | 1.50E-164 | 3       |
| BANK1         | 6.38E-159 | 0.913235055 | 0.39  | 0.042 | 1.00E-154 | 3       |
| TCF4          | 3.87E-158 | 0.917390766 | 0.383 | 0.041 | 6.07E-154 | 3       |
| SPIB          | 5.94E-157 | 0.954272165 | 0.362 | 0.035 | 9.31E-153 | 3       |
| CD72          | 2.31E-154 | 0.89608058  | 0.383 | 0.042 | 3.62E-150 | 3       |

Table S2 Continued

| Gene_marker   | P_val     | Avg_logFC   | Pct.1 | Pct.2 | P_val_adj | Cluster |
|---------------|-----------|-------------|-------|-------|-----------|---------|
| HLA-DMB       | 9.23E-151 | 1.018478384 | 0.548 | 0.112 | 1.45E-146 | 3       |
| ALOX5         | 9.69E-150 | 0.854002085 | 0.348 | 0.033 | 1.52E-145 | 3       |
| CD37          | 1.28E-148 | 0.974961817 | 0.942 | 0.696 | 2.00E-144 | 3       |
| BLNK          | 5.17E-148 | 0.855023528 | 0.359 | 0.038 | 8.11E-144 | 3       |
| MT-ND4        | 3.59E-144 | 0.639351731 | 0.998 | 0.984 | 5.63E-140 | 3       |
| FCRLA         | 7.64E-144 | 0.792631652 | 0.324 | 0.028 | 1.20E-139 | 3       |
| PHACTR1       | 5.30E-143 | 0.921520857 | 0.342 | 0.035 | 8.31E-139 | 3       |
| AP3B1         | 1.78E-142 | 0.95736193  | 0.452 | 0.075 | 2.78E-138 | 3       |
| ZFP36L1       | 9.77E-141 | 1.200476064 | 0.821 | 0.363 | 1.53E-136 | 3       |
| MARCH1        | 2.32E-140 | 0.87025507  | 0.362 | 0.042 | 3.64E-136 | 3       |
| RPS11         | 1.14E-138 | 0.596069729 | 0.995 | 0.981 | 1.78E-134 | 3       |
| CH17-373J23.1 | 1.24E-138 | 1.250636827 | 0.645 | 0.188 | 1.94E-134 | 3       |
| SERPINF1      | 2.44E-138 | 0.734730006 | 0.277 | 0.018 | 3.83E-134 | 3       |
| CD83          | 9.88E-135 | 0.842175517 | 0.317 | 0.031 | 1.55E-130 | 3       |
| LINC00926     | 1.67E-133 | 0.841162823 | 0.337 | 0.038 | 2.62E-129 | 3       |
| MT-ND3        | 1.16E-132 | 0.626965758 | 1     | 0.978 | 1.82E-128 | 3       |
| KLF6          | 1.37E-132 | 1.060020331 | 0.922 | 0.646 | 2.15E-128 | 3       |
| ITM2C         | 6.59E-131 | 1.012729233 | 0.532 | 0.122 | 1.03E-126 | 3       |
| HRK           | 1.29E-130 | 0.72434187  | 0.262 | 0.018 | 2.02E-126 | 3       |
| RGS12         | 1.62E-130 | 0.860393442 | 0.293 | 0.026 | 2.53E-126 | 3       |
| SWAP70        | 4.70E-127 | 0.745476477 | 0.293 | 0.027 | 7.36E-123 | 3       |
| JUN           | 8.83E-125 | 1.07909617  | 0.951 | 0.731 | 1.38E-120 | 3       |
| CCDC191       | 1.86E-124 | 0.729494765 | 0.273 | 0.023 | 2.92E-120 | 3       |
| BTK           | 8.47E-121 | 0.802235806 | 0.315 | 0.038 | 1.33E-116 | 3       |
| NCF1          | 4.67E-118 | 0.91275865  | 0.556 | 0.151 | 7.33E-114 | 3       |
| BLK           | 2.82E-117 | 0.693664079 | 0.282 | 0.028 | 4.42E-113 | 3       |
| HLA-DMA       | 3.65E-117 | 1.018449331 | 0.683 | 0.243 | 5.72E-113 | 3       |
| POU2F2        | 2.85E-116 | 0.930241173 | 0.461 | 0.1   | 4.47E-112 | 3       |
| LHPP          | 6.28E-114 | 0.805268246 | 0.364 | 0.058 | 9.85E-110 | 3       |
| ORAI2         | 7.87E-112 | 0.902036774 | 0.448 | 0.101 | 1.23E-107 | 3       |



Table S2 Continued

| Gene_marker   | P_val     | Avg_logFC   | Pct.1 | Pct.2 | P_val_adj | Cluster |
|---------------|-----------|-------------|-------|-------|-----------|---------|
| SMARCB1       | 9.04E-109 | 0.912583928 | 0.519 | 0.142 | 1.42E-104 | 3       |
| LINC01480     | 7.61E-107 | 0.816481497 | 0.288 | 0.035 | 1.19E-102 | 3       |
| HLA-DOB       | 6.65E-102 | 0.644124763 | 0.253 | 0.027 | 1.04E-97  | 3       |
| FOS           | 6.75E-102 | 1.154297491 | 0.787 | 0.428 | 1.06E-97  | 3       |
| STMN1         | 5.65E-100 | 0.87885143  | 0.497 | 0.136 | 8.85E-96  | 3       |
| ACADM         | 5.32E-96  | 0.86258309  | 0.479 | 0.13  | 8.33E-92  | 3       |
| RNASE6        | 5.56E-96  | 0.725726223 | 0.282 | 0.039 | 8.72E-92  | 3       |
| CCDC50        | 1.99E-94  | 0.695994506 | 0.333 | 0.059 | 3.13E-90  | 3       |
| DUSP2         | 4.99E-93  | 1.174507654 | 0.812 | 0.528 | 7.83E-89  | 3       |
| RP11-386I14.4 | 2.85E-91  | 1.08388621  | 0.661 | 0.285 | 4.46E-87  | 3       |
| RPS5          | 2.18E-89  | 0.443319731 | 0.996 | 0.985 | 3.42E-85  | 3       |
| PDLIM1        | 2.12E-86  | 0.748533055 | 0.412 | 0.102 | 3.32E-82  | 3       |
| HLA-DQA2      | 4.07E-86  | 0.806894695 | 0.734 | 0.334 | 6.38E-82  | 3       |
| GRN           | 2.45E-81  | 0.794632284 | 0.381 | 0.093 | 3.84E-77  | 3       |
| MALAT1        | 4.29E-81  | 0.334287    | 1     | 1     | 6.72E-77  | 3       |
| TRAF4         | 5.19E-80  | 0.660886425 | 0.251 | 0.038 | 8.14E-76  | 3       |
| STX7          | 2.18E-79  | 0.740391217 | 0.39  | 0.099 | 3.42E-75  | 3       |
| RPS23         | 2.55E-79  | 0.343238572 | 1     | 1     | 4.00E-75  | 3       |
| RNF130        | 1.34E-78  | 0.586389162 | 0.26  | 0.041 | 2.10E-74  | 3       |
| SPINT2        | 4.67E-77  | 0.707017881 | 0.301 | 0.06  | 7.32E-73  | 3       |
| LGALS9        | 3.52E-76  | 0.709412448 | 0.362 | 0.091 | 5.51E-72  | 3       |
| CXXC5         | 4.36E-76  | 0.623978939 | 0.262 | 0.044 | 6.84E-72  | 3       |
| LAT2          | 1.84E-74  | 0.630499198 | 0.271 | 0.049 | 2.88E-70  | 3       |
| CYB561A3      | 6.14E-74  | 0.747994897 | 0.37  | 0.095 | 9.62E-70  | 3       |
| FCMR          | 2.37E-73  | 0.751508811 | 0.545 | 0.206 | 3.71E-69  | 3       |
| MZB1          | 3.87E-71  | 0.498377001 | 0.468 | 0.149 | 6.07E-67  | 3       |
| DUSP1         | 1.05E-69  | 0.72726576  | 0.905 | 0.711 | 1.65E-65  | 3       |
| DERL3         | 3.10E-68  | 0.578051338 | 0.27  | 0.051 | 4.86E-64  | 3       |
| QRSL1         | 4.11E-68  | 0.655736539 | 0.295 | 0.065 | 6.44E-64  | 3       |
| GSTP1         | 1.87E-67  | 0.777266861 | 0.778 | 0.493 | 2.93E-63  | 3       |

Table S2 Continued

| Gene_marker | P_val    | Avg_logFC   | Pct.1 | Pct.2 | P_val_adj | Cluster |
|-------------|----------|-------------|-------|-------|-----------|---------|
| TMEM107     | 1.70E-65 | 0.790995477 | 0.47  | 0.171 | 2.66E-61  | 3       |
| DUSP22      | 3.47E-65 | 0.651500028 | 0.332 | 0.085 | 5.44E-61  | 3       |
| FOSB        | 1.37E-64 | 0.841337982 | 0.59  | 0.272 | 2.15E-60  | 3       |
| CCR7        | 2.54E-64 | 0.696465846 | 0.388 | 0.114 | 3.99E-60  | 3       |
| HLA-DQA1    | 1.33E-63 | 0.735472252 | 0.587 | 0.249 | 2.09E-59  | 3       |
| SEC62       | 6.33E-63 | 0.732654752 | 0.743 | 0.437 | 9.93E-59  | 3       |
| TSC22D3     | 6.49E-62 | 0.556829576 | 0.929 | 0.762 | 1.02E-57  | 3       |
| PTMA        | 5.62E-61 | 0.354679733 | 1     | 0.999 | 8.80E-57  | 3       |
| HERPUD1     | 6.45E-61 | 0.946528425 | 0.599 | 0.304 | 1.01E-56  | 3       |
| MT-ND1      | 2.29E-59 | 0.563116939 | 0.938 | 0.775 | 3.59E-55  | 3       |
| CXCR4       | 2.50E-59 | 0.738836566 | 0.803 | 0.568 | 3.92E-55  | 3       |
| MT-CO2      | 1.54E-57 | 0.346669126 | 0.998 | 0.997 | 2.42E-53  | 3       |
| TMEM154     | 2.61E-55 | 0.580151719 | 0.297 | 0.077 | 4.09E-51  | 3       |
| PNN         | 1.26E-53 | 0.704067184 | 0.587 | 0.291 | 1.98E-49  | 3       |
| TMEM243     | 1.41E-53 | 0.667694027 | 0.47  | 0.194 | 2.22E-49  | 3       |
| ZFP36       | 3.46E-53 | 0.818349462 | 0.656 | 0.396 | 5.42E-49  | 3       |
| TUBB        | 4.51E-53 | 0.629339493 | 0.658 | 0.37  | 7.06E-49  | 3       |
| PSAP        | 5.89E-53 | 0.613366204 | 0.667 | 0.367 | 9.23E-49  | 3       |
| DDAH2       | 7.88E-52 | 0.56943864  | 0.277 | 0.071 | 1.23E-47  | 3       |
| HIST1H4C    | 1.11E-50 | 0.589915675 | 0.439 | 0.177 | 1.73E-46  | 3       |
| SNHG7       | 2.25E-50 | 0.651185643 | 0.432 | 0.171 | 3.53E-46  | 3       |
| NSG1        | 2.26E-49 | 0.620435802 | 0.257 | 0.065 | 3.54E-45  | 3       |
| RRAS2       | 1.21E-46 | 0.51860109  | 0.306 | 0.092 | 1.89E-42  | 3       |
| HLA-DPA1    | 9.36E-46 | 0.496435966 | 0.852 | 0.658 | 1.47E-41  | 3       |
| FOXP1       | 5.96E-44 | 0.598432407 | 0.423 | 0.176 | 9.34E-40  | 3       |
| DRAM2       | 1.01E-43 | 0.557528164 | 0.395 | 0.158 | 1.59E-39  | 3       |
| KTN1        | 1.39E-43 | 0.626147771 | 0.552 | 0.288 | 2.17E-39  | 3       |
| HLA-DQB1    | 2.48E-42 | 0.615271005 | 0.514 | 0.252 | 3.90E-38  | 3       |
| RPS16       | 1.83E-41 | 0.250939129 | 1     | 0.998 | 2.87E-37  | 3       |
| SYPL1       | 1.92E-41 | 0.514121765 | 0.342 | 0.122 | 3.01E-37  | 3       |

Table S2 Continued

| Gene_marker   | P_val    | Avg_logFC   | Pct.1 | Pct.2 | P_val_adj | Cluster |
|---------------|----------|-------------|-------|-------|-----------|---------|
| IGHG2         | 3.14E-41 | 0.388537312 | 0.35  | 0.128 | 4.93E-37  | 3       |
| H3F3A         | 9.31E-41 | 0.397447889 | 0.945 | 0.873 | 1.46E-36  | 3       |
| CHI3L2        | 1.22E-40 | 0.556643841 | 0.31  | 0.105 | 1.91E-36  | 3       |
| TUBA1A        | 1.34E-40 | 0.693446693 | 0.55  | 0.293 | 2.10E-36  | 3       |
| RIC3          | 2.33E-40 | 0.465504596 | 0.259 | 0.076 | 3.66E-36  | 3       |
| RP11-347P5.1  | 2.59E-40 | 0.628105185 | 0.687 | 0.443 | 4.06E-36  | 3       |
| HLA-DRB1      | 1.91E-38 | 0.526381489 | 0.827 | 0.632 | 3.00E-34  | 3       |
| MSI2          | 2.37E-38 | 0.466519721 | 0.266 | 0.084 | 3.71E-34  | 3       |
| TAF7          | 9.50E-36 | 0.52591954  | 0.495 | 0.256 | 1.49E-31  | 3       |
| PDE4B         | 4.79E-35 | 0.460416459 | 0.251 | 0.08  | 7.52E-31  | 3       |
| PPP1R15A      | 7.56E-34 | 0.53663606  | 0.658 | 0.446 | 1.19E-29  | 3       |
| PRDM2         | 1.23E-33 | 0.513005296 | 0.324 | 0.13  | 1.93E-29  | 3       |
| FCGRT         | 2.06E-32 | 0.499268449 | 0.288 | 0.108 | 3.23E-28  | 3       |
| PPM1K         | 1.48E-31 | 0.530306983 | 0.348 | 0.153 | 2.33E-27  | 3       |
| GGA1          | 1.68E-30 | 0.481646878 | 0.435 | 0.215 | 2.64E-26  | 3       |
| JMJD1C        | 2.66E-30 | 0.468236581 | 0.301 | 0.12  | 4.17E-26  | 3       |
| RP11-160E2.6  | 3.04E-27 | 0.453733201 | 0.432 | 0.22  | 4.77E-23  | 3       |
| PMAIP1        | 4.96E-27 | 0.402883373 | 0.271 | 0.107 | 7.77E-23  | 3       |
| RTN4          | 8.79E-27 | 0.51318619  | 0.466 | 0.266 | 1.38E-22  | 3       |
| TRAF5         | 9.90E-27 | 0.422056054 | 0.257 | 0.101 | 1.55E-22  | 3       |
| ZBTB20        | 1.47E-26 | 0.427882881 | 0.253 | 0.098 | 2.30E-22  | 3       |
| MT-ND5        | 1.63E-26 | 0.357378979 | 0.905 | 0.807 | 2.56E-22  | 3       |
| APEX1         | 2.67E-26 | 0.468284654 | 0.333 | 0.157 | 4.19E-22  | 3       |
| WASF2         | 1.22E-25 | 0.478909038 | 0.466 | 0.271 | 1.91E-21  | 3       |
| RCSD1         | 2.84E-25 | 0.462848315 | 0.459 | 0.262 | 4.45E-21  | 3       |
| RNASSET2      | 1.69E-24 | 0.423644591 | 0.603 | 0.4   | 2.64E-20  | 3       |
| JUND          | 2.10E-24 | 0.500364308 | 0.408 | 0.226 | 3.30E-20  | 3       |
| TIA1          | 3.10E-24 | 0.419253842 | 0.273 | 0.116 | 4.86E-20  | 3       |
| RP5-1171I10.5 | 4.71E-24 | 0.533672728 | 0.468 | 0.279 | 7.39E-20  | 3       |
| MT-ND2        | 1.60E-23 | 0.25204314  | 0.987 | 0.979 | 2.50E-19  | 3       |

Table S2 Continued

| Gene_marker | P_val    | Avg_logFC   | Pct.1 | Pct.2 | P_val_adj | Cluster |
|-------------|----------|-------------|-------|-------|-----------|---------|
| PSMA3-AS1   | 1.66E-23 | 0.429196446 | 0.505 | 0.306 | 2.61E-19  | 3       |
| CHMP1B      | 3.40E-23 | 0.442876501 | 0.377 | 0.2   | 5.34E-19  | 3       |
| MCL1        | 7.83E-23 | 0.498760752 | 0.601 | 0.435 | 1.23E-18  | 3       |
| MPG         | 1.59E-22 | 0.426097602 | 0.33  | 0.161 | 2.49E-18  | 3       |
| BTG1        | 2.14E-22 | 0.302627728 | 0.942 | 0.904 | 3.36E-18  | 3       |
| PRKCB       | 5.64E-22 | 0.422613964 | 0.454 | 0.268 | 8.84E-18  | 3       |
| LAPTM4A     | 7.65E-22 | 0.4572657   | 0.435 | 0.258 | 1.20E-17  | 3       |
| PHF14       | 2.20E-21 | 0.398307821 | 0.337 | 0.171 | 3.45E-17  | 3       |
| PNISR       | 2.45E-21 | 0.375515796 | 0.78  | 0.622 | 3.84E-17  | 3       |
| GTF2I       | 3.24E-21 | 0.374042003 | 0.266 | 0.119 | 5.07E-17  | 3       |
| HNRNPA0     | 3.26E-20 | 0.3805986   | 0.672 | 0.511 | 5.11E-16  | 3       |
| TLK1        | 1.44E-19 | 0.39771236  | 0.271 | 0.13  | 2.25E-15  | 3       |
| CNPY3       | 2.86E-18 | 0.382633136 | 0.361 | 0.202 | 4.48E-14  | 3       |
| CHD9        | 1.01E-17 | 0.372255423 | 0.282 | 0.14  | 1.59E-13  | 3       |
| HPCAL1      | 6.46E-17 | 0.331116239 | 0.271 | 0.134 | 1.01E-12  | 3       |
| GDI2        | 9.80E-17 | 0.353058017 | 0.552 | 0.386 | 1.54E-12  | 3       |
| ACP5        | 2.13E-16 | 0.390984868 | 0.257 | 0.13  | 3.34E-12  | 3       |
| MT-ND4L     | 2.60E-16 | 0.373876916 | 0.466 | 0.31  | 4.07E-12  | 3       |
| EIF1B       | 9.57E-16 | 0.365972253 | 0.39  | 0.244 | 1.50E-11  | 3       |
| ANKRD10     | 1.62E-15 | 0.347355961 | 0.281 | 0.15  | 2.54E-11  | 3       |
| HSP90AB1    | 3.70E-15 | 0.369417714 | 0.579 | 0.433 | 5.80E-11  | 3       |
| TRA2B       | 1.11E-14 | 0.347658483 | 0.537 | 0.392 | 1.74E-10  | 3       |
| HMGNI       | 2.41E-14 | 0.268700663 | 0.783 | 0.647 | 3.78E-10  | 3       |
| ARL5A       | 2.80E-14 | 0.321986546 | 0.43  | 0.279 | 4.38E-10  | 3       |
| WDR74       | 3.44E-14 | 0.353879598 | 0.29  | 0.162 | 5.40E-10  | 3       |
| ST13        | 1.23E-13 | 0.324963405 | 0.543 | 0.392 | 1.93E-09  | 3       |
| LAMTOR1     | 1.24E-13 | 0.343978473 | 0.499 | 0.352 | 1.94E-09  | 3       |
| GPX1        | 1.85E-13 | 0.334091122 | 0.454 | 0.31  | 2.90E-09  | 3       |
| LSM7        | 2.29E-13 | 0.341694615 | 0.515 | 0.374 | 3.59E-09  | 3       |
| NPC2        | 2.36E-13 | 0.321289185 | 0.315 | 0.187 | 3.70E-09  | 3       |

Table S2 Continued

| Gene_marker | P_val    | Avg_logFC   | Pct.1 | Pct.2 | P_val_adj   | Cluster |
|-------------|----------|-------------|-------|-------|-------------|---------|
| ESD         | 2.84E-13 | 0.31652421  | 0.35  | 0.212 | 4.45E-09    | 3       |
| AP1S2       | 3.19E-13 | 0.343385066 | 0.273 | 0.152 | 5.00E-09    | 3       |
| MDM4        | 3.22E-13 | 0.469390729 | 0.375 | 0.244 | 5.04E-09    | 3       |
| EIF3L       | 3.67E-13 | 0.310789888 | 0.678 | 0.539 | 5.75E-09    | 3       |
| SNX3        | 3.86E-13 | 0.323038    | 0.579 | 0.441 | 6.05E-09    | 3       |
| SET         | 6.16E-13 | 0.353343497 | 0.506 | 0.36  | 9.66E-09    | 3       |
| C12orf57    | 1.60E-12 | 0.385741237 | 0.603 | 0.497 | 2.52E-08    | 3       |
| TTC3        | 3.20E-12 | 0.284173403 | 0.37  | 0.232 | 5.02E-08    | 3       |
| NEMF        | 4.27E-12 | 0.266728186 | 0.268 | 0.149 | 6.70E-08    | 3       |
| AKAP9       | 4.31E-12 | 0.324278099 | 0.362 | 0.235 | 6.75E-08    | 3       |
| IKZF3       | 4.63E-12 | 0.357082157 | 0.282 | 0.166 | 7.26E-08    | 3       |
| SPG21       | 1.60E-11 | 0.300834825 | 0.301 | 0.183 | 2.51E-07    | 3       |
| RBM23       | 3.27E-11 | 0.322570545 | 0.271 | 0.163 | 5.13E-07    | 3       |
| KMT2E       | 6.57E-10 | 0.301099657 | 0.439 | 0.317 | 1.03E-05    | 3       |
| PEBP1       | 1.19E-09 | 0.268512762 | 0.528 | 0.412 | 1.86E-05    | 3       |
| CDK5RAP3    | 1.30E-09 | 0.279936204 | 0.271 | 0.169 | 2.04E-05    | 3       |
| RSF1        | 1.35E-08 | 0.269047322 | 0.264 | 0.167 | 0.000211047 | 3       |
| CHCHD10     | 1.95E-08 | 0.293867431 | 0.326 | 0.224 | 0.000305297 | 3       |
| TNRC6B      | 3.51E-08 | 0.292871807 | 0.404 | 0.304 | 0.000549988 | 3       |
| SFPQ        | 3.70E-08 | 0.256689815 | 0.359 | 0.252 | 0.000579975 | 3       |
| RNASEH2B    | 3.72E-08 | 0.275210003 | 0.313 | 0.217 | 0.00058327  | 3       |
| EIF2S3      | 4.38E-08 | 0.277537187 | 0.321 | 0.224 | 0.00068603  | 3       |
| ATP5O       | 1.34E-07 | 0.252062683 | 0.521 | 0.433 | 0.002096307 | 3       |
| NFKBIA      | 2.27E-07 | 0.34411828  | 0.279 | 0.19  | 0.003552291 | 3       |
| SLC2A3      | 2.42E-07 | 0.259015818 | 0.332 | 0.234 | 0.003786889 | 3       |
| SLC38A2     | 4.68E-07 | 0.259340475 | 0.346 | 0.252 | 0.007334196 | 3       |
| CCND1       | 3.11E-69 | 0.767314033 | 0.799 | 0.182 | 4.88E-65    | 4       |
| MS4A1       | 3.05E-64 | 0.673833584 | 0.878 | 0.228 | 4.79E-60    | 4       |
| CD79B       | 9.98E-58 | 0.71033081  | 0.915 | 0.29  | 1.56E-53    | 4       |
| EGR1        | 5.79E-56 | 0.790014526 | 0.713 | 0.182 | 9.07E-52    | 4       |

Table S2 Continued

| Gene_marker   | P_val    | Avg_logFC   | Pct.1 | Pct.2 | P_val_adj | Cluster |
|---------------|----------|-------------|-------|-------|-----------|---------|
| IGLC7         | 5.18E-55 | 0.679873532 | 0.774 | 0.207 | 8.12E-51  | 4       |
| CD79A         | 2.37E-53 | 0.634841931 | 0.848 | 0.249 | 3.72E-49  | 4       |
| BTG2          | 3.89E-53 | 0.795356092 | 0.854 | 0.294 | 6.10E-49  | 4       |
| IGLC6         | 3.80E-52 | 0.481392546 | 0.671 | 0.157 | 5.95E-48  | 4       |
| IGLC3         | 1.24E-50 | 0.295402194 | 0.976 | 0.472 | 1.95E-46  | 4       |
| IGLC2         | 2.45E-48 | 0.347225889 | 1     | 0.945 | 3.83E-44  | 4       |
| VPREB3        | 1.26E-47 | 0.670434248 | 0.665 | 0.174 | 1.97E-43  | 4       |
| MARCH1        | 7.32E-44 | 0.625698494 | 0.39  | 0.073 | 1.15E-39  | 4       |
| ARHGAP24      | 3.05E-39 | 0.554082635 | 0.415 | 0.087 | 4.77E-35  | 4       |
| CD74          | 2.08E-38 | 0.598285058 | 1     | 0.936 | 3.26E-34  | 4       |
| CD24          | 1.29E-36 | 0.486674571 | 0.482 | 0.115 | 2.02E-32  | 4       |
| IGHD          | 5.65E-36 | 0.455572494 | 0.415 | 0.092 | 8.86E-32  | 4       |
| RP11-231C14.7 | 2.59E-35 | 0.492433031 | 0.402 | 0.089 | 4.06E-31  | 4       |
| MT-ND4        | 8.80E-35 | 0.450337734 | 1     | 0.985 | 1.38E-30  | 4       |
| HLA-DRA       | 1.05E-31 | 0.537652465 | 0.963 | 0.604 | 1.65E-27  | 4       |
| HLA-DMB       | 5.45E-31 | 0.543082938 | 0.53  | 0.157 | 8.55E-27  | 4       |
| IER2          | 7.62E-30 | 0.60201819  | 0.945 | 0.562 | 1.19E-25  | 4       |
| RP5-887A10.1  | 1.19E-29 | 0.594663797 | 0.366 | 0.088 | 1.87E-25  | 4       |
| RALGPS2       | 4.58E-29 | 0.447599096 | 0.348 | 0.079 | 7.18E-25  | 4       |
| PHACTR1       | 7.79E-29 | 0.516951589 | 0.311 | 0.067 | 1.22E-24  | 4       |
| FADS3         | 8.59E-28 | 0.475538053 | 0.354 | 0.085 | 1.35E-23  | 4       |
| TCF4          | 5.22E-27 | 0.441308153 | 0.329 | 0.077 | 8.18E-23  | 4       |
| CD19          | 7.17E-27 | 0.409338215 | 0.402 | 0.107 | 1.12E-22  | 4       |
| KLF6          | 1.73E-26 | 0.582141464 | 0.945 | 0.673 | 2.72E-22  | 4       |
| LINC00926     | 2.60E-26 | 0.43151208  | 0.305 | 0.069 | 4.07E-22  | 4       |
| H3F3B         | 2.64E-26 | 0.46571021  | 1     | 0.956 | 4.13E-22  | 4       |
| MT-ND3        | 1.05E-24 | 0.380952708 | 1     | 0.98  | 1.64E-20  | 4       |
| CH17-373J23.1 | 2.52E-24 | 0.521421537 | 0.616 | 0.236 | 3.94E-20  | 4       |
| TNFRSF13C     | 4.51E-24 | 0.374093164 | 0.421 | 0.122 | 7.06E-20  | 4       |
| SOX11         | 7.41E-24 | 0.408549825 | 0.299 | 0.071 | 1.16E-19  | 4       |

Table S2 Continued

| Gene_marker   | P_val    | Avg_logFC   | Pct.1 | Pct.2 | P_val_adj | Cluster |
|---------------|----------|-------------|-------|-------|-----------|---------|
| FAM129C       | 9.90E-24 | 0.375606952 | 0.354 | 0.093 | 1.55E-19  | 4       |
| BLNK          | 3.64E-23 | 0.381157758 | 0.299 | 0.073 | 5.71E-19  | 4       |
| MALAT1        | 3.35E-22 | 0.260883932 | 1     | 1     | 5.26E-18  | 4       |
| CD9           | 1.05E-21 | 0.399230389 | 0.348 | 0.098 | 1.64E-17  | 4       |
| CD69          | 2.11E-21 | 0.460281783 | 0.902 | 0.594 | 3.31E-17  | 4       |
| ORAI2         | 5.24E-21 | 0.372509943 | 0.427 | 0.136 | 8.21E-17  | 4       |
| CCR7          | 6.91E-21 | 0.541840061 | 0.415 | 0.14  | 1.08E-16  | 4       |
| CXCR4         | 1.15E-19 | 0.565701781 | 0.915 | 0.587 | 1.80E-15  | 4       |
| SPIB          | 1.46E-19 | 0.343062093 | 0.274 | 0.071 | 2.29E-15  | 4       |
| ZFP36L1       | 6.09E-19 | 0.502438259 | 0.768 | 0.412 | 9.55E-15  | 4       |
| MT-ND1        | 1.23E-18 | 0.413669242 | 0.976 | 0.79  | 1.93E-14  | 4       |
| CLECL1        | 2.65E-18 | 0.304428651 | 0.36  | 0.112 | 4.15E-14  | 4       |
| TCL1A         | 4.25E-18 | 0.278089444 | 0.305 | 0.087 | 6.67E-14  | 4       |
| SMARCB1       | 5.38E-18 | 0.379117176 | 0.494 | 0.181 | 8.44E-14  | 4       |
| STX7          | 1.35E-17 | 0.400674452 | 0.384 | 0.129 | 2.11E-13  | 4       |
| AP3B1         | 2.21E-17 | 0.382630527 | 0.36  | 0.117 | 3.46E-13  | 4       |
| FCMR          | 5.89E-17 | 0.417884802 | 0.567 | 0.239 | 9.24E-13  | 4       |
| MT-CO3        | 7.39E-17 | 0.274798223 | 1     | 0.994 | 1.16E-12  | 4       |
| SMIM14        | 1.49E-16 | 0.292396918 | 0.47  | 0.174 | 2.34E-12  | 4       |
| MT-CO2        | 3.00E-16 | 0.272675003 | 1     | 0.997 | 4.71E-12  | 4       |
| RP11-386I14.4 | 3.04E-16 | 0.486145084 | 0.652 | 0.323 | 4.76E-12  | 4       |
| FCRL2         | 6.85E-16 | 0.342570188 | 0.317 | 0.102 | 1.07E-11  | 4       |
| CD72          | 7.16E-16 | 0.296477947 | 0.274 | 0.081 | 1.12E-11  | 4       |
| POU2F2        | 1.14E-15 | 0.331006355 | 0.39  | 0.139 | 1.79E-11  | 4       |
| ITM2C         | 3.07E-15 | 0.297925052 | 0.445 | 0.167 | 4.82E-11  | 4       |
| MT-ND2        | 5.04E-15 | 0.326013099 | 1     | 0.979 | 7.89E-11  | 4       |
| GNG11         | 7.21E-15 | 0.308458952 | 0.299 | 0.095 | 1.13E-10  | 4       |
| FOSB          | 1.07E-13 | 0.43794152  | 0.591 | 0.304 | 1.67E-09  | 4       |
| CELF1         | 1.62E-13 | 0.369444957 | 0.415 | 0.167 | 2.53E-09  | 4       |
| LHPP          | 3.39E-13 | 0.333525581 | 0.274 | 0.093 | 5.32E-09  | 4       |

Table S2 Continued

| Gene_marker   | P_val    | Avg_logFC   | Pct.1 | Pct.2 | P_val_adj | Cluster |
|---------------|----------|-------------|-------|-------|-----------|---------|
| HLA-DMA       | 4.57E-13 | 0.332860251 | 0.61  | 0.29  | 7.16E-09  | 4       |
| RHOB          | 4.58E-13 | 0.318955189 | 0.305 | 0.11  | 7.18E-09  | 4       |
| NFKBIZ        | 5.24E-13 | 0.309685533 | 0.262 | 0.087 | 8.22E-09  | 4       |
| MT-CYB        | 5.44E-13 | 0.292790309 | 1     | 0.963 | 8.52E-09  | 4       |
| CD37          | 6.42E-13 | 0.292563439 | 0.963 | 0.719 | 1.01E-08  | 4       |
| JUN           | 8.82E-13 | 0.273215597 | 0.988 | 0.752 | 1.38E-08  | 4       |
| ZBTB20        | 3.26E-12 | 0.32675279  | 0.305 | 0.111 | 5.11E-08  | 4       |
| HERPUD1       | 4.86E-12 | 0.362910144 | 0.628 | 0.333 | 7.62E-08  | 4       |
| MARCKSL1      | 5.03E-12 | 0.362718881 | 0.488 | 0.227 | 7.88E-08  | 4       |
| NCF1          | 8.17E-12 | 0.370414776 | 0.439 | 0.197 | 1.28E-07  | 4       |
| RP11-347P5.1  | 2.47E-11 | 0.431981334 | 0.738 | 0.465 | 3.88E-07  | 4       |
| FOS           | 4.78E-11 | 0.330830043 | 0.762 | 0.465 | 7.49E-07  | 4       |
| LINC01089     | 4.78E-11 | 0.282878116 | 0.274 | 0.101 | 7.50E-07  | 4       |
| REL           | 8.23E-11 | 0.265018588 | 0.329 | 0.129 | 1.29E-06  | 4       |
| PNISR         | 1.04E-10 | 0.311641217 | 0.915 | 0.632 | 1.63E-06  | 4       |
| IRF9          | 2.30E-10 | 0.283759632 | 0.317 | 0.129 | 3.61E-06  | 4       |
| PNN           | 3.87E-10 | 0.392844695 | 0.573 | 0.321 | 6.06E-06  | 4       |
| RP5-1171I10.5 | 5.68E-10 | 0.348740531 | 0.543 | 0.295 | 8.91E-06  | 4       |
| XRRA1         | 7.71E-10 | 0.263184831 | 0.28  | 0.11  | 1.21E-05  | 4       |
| HLA-DQA1      | 8.44E-10 | 0.264541646 | 0.555 | 0.284 | 1.32E-05  | 4       |
| TNRC6A        | 9.57E-10 | 0.253003179 | 0.256 | 0.098 | 1.50E-05  | 4       |
| NEMF          | 1.10E-09 | 0.299550002 | 0.354 | 0.157 | 1.72E-05  | 4       |
| TUBA1A        | 1.20E-09 | 0.372776259 | 0.567 | 0.318 | 1.88E-05  | 4       |
| DUSP22        | 1.34E-09 | 0.29043995  | 0.274 | 0.112 | 2.10E-05  | 4       |
| RCSD1         | 2.03E-09 | 0.312167533 | 0.53  | 0.279 | 3.19E-05  | 4       |
| JMJD1C        | 2.30E-09 | 0.258062553 | 0.323 | 0.138 | 3.61E-05  | 4       |
| ERV3-1        | 2.60E-09 | 0.256313813 | 0.256 | 0.1   | 4.07E-05  | 4       |
| DUSP2         | 3.41E-09 | 0.352921308 | 0.78  | 0.558 | 5.34E-05  | 4       |
| MIDN          | 3.93E-09 | 0.288098146 | 0.293 | 0.124 | 6.16E-05  | 4       |
| TMEM243       | 5.87E-09 | 0.279242711 | 0.451 | 0.223 | 9.20E-05  | 4       |



Table S2 Continued

| Gene_marker | P_val     | Avg_logFC   | Pct.1 | Pct.2 | P_val_adj   | Cluster |
|-------------|-----------|-------------|-------|-------|-------------|---------|
| JUND        | 6.93E-09  | 0.299833803 | 0.47  | 0.242 | 0.000108653 | 4       |
| LINC00969   | 7.05E-09  | 0.252992543 | 0.287 | 0.12  | 0.000110561 | 4       |
| SNHG7       | 7.52E-09  | 0.261789815 | 0.409 | 0.198 | 0.000117828 | 4       |
| FCGRT       | 1.08E-08  | 0.264352067 | 0.293 | 0.126 | 0.000168818 | 4       |
| TAF7        | 1.13E-08  | 0.291970081 | 0.524 | 0.278 | 0.000177859 | 4       |
| PRDM2       | 1.26E-08  | 0.26933168  | 0.335 | 0.149 | 0.000197396 | 4       |
| RBM23       | 1.48E-08  | 0.251560484 | 0.366 | 0.17  | 0.000231717 | 4       |
| ZFP36       | 2.25E-08  | 0.292345442 | 0.665 | 0.422 | 0.000352303 | 4       |
| DUSP1       | 4.37E-08  | 0.25737334  | 0.921 | 0.73  | 0.000685686 | 4       |
| POLR2J3     | 5.97E-08  | 0.272237559 | 0.738 | 0.471 | 0.00093621  | 4       |
| MARK3       | 1.36E-07  | 0.257063064 | 0.305 | 0.141 | 0.002128203 | 4       |
| SEC62       | 2.09E-07  | 0.267132132 | 0.72  | 0.468 | 0.003270158 | 4       |
| PRKCB       | 5.04E-07  | 0.252580611 | 0.512 | 0.284 | 0.007903225 | 4       |
| KLRF1       | 0         | 2.242124133 | 0.863 | 0.032 | 0           | 5       |
| KLRC1       | 2.21E-297 | 2.043367204 | 0.634 | 0.017 | 3.46E-293   | 5       |
| TRDC        | 6.63E-294 | 1.931205686 | 0.779 | 0.033 | 1.04E-289   | 5       |
| FCER1G      | 6.61E-240 | 1.855822643 | 0.779 | 0.044 | 1.04E-235   | 5       |
| TYROBP      | 2.91E-219 | 2.151456962 | 0.901 | 0.078 | 4.57E-215   | 5       |
| SH2D1B      | 1.50E-173 | 0.909052169 | 0.321 | 0.006 | 2.36E-169   | 5       |
| IGFBP7      | 4.26E-156 | 0.874526849 | 0.298 | 0.006 | 6.67E-152   | 5       |
| GNLY        | 2.73E-94  | 2.723132533 | 0.992 | 0.415 | 4.28E-90    | 5       |
| KLRC2       | 1.41E-90  | 0.925866042 | 0.252 | 0.011 | 2.21E-86    | 5       |
| IFITM3      | 2.50E-78  | 1.125425877 | 0.527 | 0.07  | 3.92E-74    | 5       |
| GZMB        | 1.71E-69  | 1.784732992 | 0.916 | 0.305 | 2.68E-65    | 5       |
| KLRD1       | 2.99E-61  | 1.263424072 | 0.962 | 0.437 | 4.69E-57    | 5       |
| XCL1        | 1.29E-59  | 0.908443808 | 0.282 | 0.025 | 2.02E-55    | 5       |
| HOPX        | 3.80E-57  | 1.291944956 | 0.748 | 0.216 | 5.96E-53    | 5       |
| PLAC8       | 5.38E-55  | 1.197874936 | 0.695 | 0.184 | 8.43E-51    | 5       |
| ID2         | 4.94E-51  | 1.213664129 | 0.924 | 0.422 | 7.74E-47    | 5       |
| CTSW        | 1.94E-43  | 0.991041423 | 0.969 | 0.592 | 3.04E-39    | 5       |

Table S2 Continued

| Gene_marker | P_val    | Avg_logFC   | Pct.1 | Pct.2 | P_val_adj | Cluster |
|-------------|----------|-------------|-------|-------|-----------|---------|
| FCGR3A      | 1.35E-42 | 0.964280937 | 0.489 | 0.104 | 2.11E-38  | 5       |
| NKG7        | 6.80E-42 | 0.924740766 | 0.992 | 0.828 | 1.07E-37  | 5       |
| CD7         | 2.92E-41 | 1.217271549 | 0.832 | 0.4   | 4.58E-37  | 5       |
| IL2RB       | 5.85E-38 | 0.970288789 | 0.542 | 0.143 | 9.17E-34  | 5       |
| TRGC1       | 1.41E-37 | 0.86436367  | 0.42  | 0.086 | 2.22E-33  | 5       |
| IFITM2      | 5.97E-37 | 1.090718996 | 0.901 | 0.585 | 9.36E-33  | 5       |
| NCR3        | 4.22E-36 | 0.662738321 | 0.313 | 0.051 | 6.61E-32  | 5       |
| SRGN        | 1.08E-35 | 0.886395147 | 0.954 | 0.702 | 1.69E-31  | 5       |
| CD300A      | 5.57E-34 | 0.773698749 | 0.305 | 0.052 | 8.74E-30  | 5       |
| CMC1        | 1.42E-33 | 0.969731961 | 0.901 | 0.5   | 2.23E-29  | 5       |
| XCL2        | 5.95E-27 | 0.891345548 | 0.466 | 0.139 | 9.32E-23  | 5       |
| KLRB1       | 1.66E-26 | 0.923972139 | 0.595 | 0.215 | 2.60E-22  | 5       |
| GPR65       | 8.16E-26 | 0.782895453 | 0.496 | 0.159 | 1.28E-21  | 5       |
| SPON2       | 1.96E-25 | 1.166311398 | 0.481 | 0.164 | 3.07E-21  | 5       |
| PRF1        | 6.57E-25 | 0.941528478 | 0.748 | 0.374 | 1.03E-20  | 5       |
| CD63        | 6.61E-24 | 0.811796574 | 0.695 | 0.336 | 1.04E-19  | 5       |
| PRSS23      | 2.42E-22 | 0.607057991 | 0.313 | 0.075 | 3.79E-18  | 5       |
| FGFBP2      | 1.49E-19 | 0.936151839 | 0.649 | 0.307 | 2.34E-15  | 5       |
| CST7        | 3.04E-19 | 0.607811752 | 0.931 | 0.685 | 4.77E-15  | 5       |
| CHST12      | 1.38E-18 | 0.625485374 | 0.618 | 0.273 | 2.16E-14  | 5       |
| TBX21       | 2.16E-18 | 0.663603468 | 0.412 | 0.139 | 3.39E-14  | 5       |
| S1PR5       | 2.33E-18 | 0.623990709 | 0.45  | 0.161 | 3.65E-14  | 5       |
| UBE2F       | 9.30E-18 | 0.608682941 | 0.382 | 0.129 | 1.46E-13  | 5       |
| GZMA        | 1.79E-17 | 0.559437474 | 0.939 | 0.625 | 2.80E-13  | 5       |
| RHOC        | 3.82E-17 | 0.672622357 | 0.45  | 0.175 | 5.99E-13  | 5       |
| FGR         | 3.85E-17 | 0.665690827 | 0.458 | 0.182 | 6.03E-13  | 5       |
| EFHD2       | 1.51E-16 | 0.59888965  | 0.42  | 0.156 | 2.37E-12  | 5       |
| HCST        | 1.96E-16 | 0.480784124 | 0.962 | 0.806 | 3.07E-12  | 5       |
| SELL        | 1.08E-15 | 1.035943497 | 0.519 | 0.253 | 1.69E-11  | 5       |
| TTC38       | 3.41E-15 | 0.560340072 | 0.313 | 0.101 | 5.35E-11  | 5       |

Table S2 Continued

| Gene_marker  | P_val    | Avg_logFC   | Pct.1 | Pct.2 | P_val_adj   | Cluster |
|--------------|----------|-------------|-------|-------|-------------|---------|
| CLIC3        | 9.18E-15 | 0.813261407 | 0.435 | 0.186 | 1.44E-10    | 5       |
| LAIR2        | 5.88E-14 | 0.605315096 | 0.321 | 0.111 | 9.22E-10    | 5       |
| RAP1B        | 6.72E-14 | 0.434185858 | 0.809 | 0.513 | 1.05E-09    | 5       |
| MATK         | 1.19E-13 | 0.563249473 | 0.42  | 0.173 | 1.87E-09    | 5       |
| MYO1F        | 1.56E-13 | 0.471130529 | 0.756 | 0.47  | 2.45E-09    | 5       |
| C1orf162     | 2.79E-13 | 0.592165236 | 0.382 | 0.153 | 4.38E-09    | 5       |
| DDIT4        | 5.71E-13 | 0.523461489 | 0.458 | 0.209 | 8.95E-09    | 5       |
| IFITM1       | 1.13E-12 | 0.577419585 | 0.603 | 0.343 | 1.78E-08    | 5       |
| ADGRG1       | 2.88E-12 | 0.519010731 | 0.328 | 0.123 | 4.52E-08    | 5       |
| CD247        | 6.64E-12 | 0.632254145 | 0.595 | 0.331 | 1.04E-07    | 5       |
| XBP1         | 5.82E-11 | 0.453005882 | 0.588 | 0.314 | 9.12E-07    | 5       |
| RP11-160E2.6 | 7.12E-11 | 0.644634679 | 0.466 | 0.242 | 1.12E-06    | 5       |
| LY6E         | 1.02E-10 | 0.488143262 | 0.809 | 0.616 | 1.60E-06    | 5       |
| SAMD3        | 1.41E-10 | 0.41708839  | 0.496 | 0.238 | 2.21E-06    | 5       |
| MT-CO1       | 1.59E-10 | 0.254641702 | 1     | 0.998 | 2.49E-06    | 5       |
| ITGB2        | 5.00E-10 | 0.430486289 | 0.824 | 0.667 | 7.84E-06    | 5       |
| HMGN3        | 6.06E-10 | 0.484946957 | 0.557 | 0.328 | 9.50E-06    | 5       |
| CTSD         | 7.52E-10 | 0.517599635 | 0.458 | 0.244 | 1.18E-05    | 5       |
| DRAP1        | 3.85E-09 | 0.355719811 | 0.718 | 0.473 | 6.04E-05    | 5       |
| GZMH         | 4.66E-09 | 0.411273418 | 0.817 | 0.555 | 7.30E-05    | 5       |
| AC092580.4   | 5.70E-09 | 0.523766339 | 0.626 | 0.422 | 8.94E-05    | 5       |
| FAM49B       | 5.83E-09 | 0.470491271 | 0.679 | 0.468 | 9.14E-05    | 5       |
| PTGER2       | 6.71E-09 | 0.441014665 | 0.26  | 0.104 | 0.000105263 | 5       |
| TSPAN32      | 1.22E-08 | 0.417096746 | 0.282 | 0.117 | 0.000191762 | 5       |
| BST2         | 1.26E-08 | 0.428408509 | 0.534 | 0.312 | 0.000198178 | 5       |
| NDUFB7       | 1.45E-08 | 0.464893979 | 0.565 | 0.364 | 0.00022771  | 5       |
| SDF4         | 2.45E-08 | 0.398526343 | 0.366 | 0.181 | 0.000383347 | 5       |
| NEAT1        | 3.98E-08 | 0.325967879 | 0.817 | 0.639 | 0.000623124 | 5       |
| PLEK         | 5.69E-08 | 0.382015083 | 0.557 | 0.323 | 0.000891529 | 5       |
| LIMD2        | 1.27E-07 | 0.38256057  | 0.832 | 0.733 | 0.001991468 | 5       |

Table S2 Continued

| Gene_marker   | P_val    | Avg_logFC   | Pct.1 | Pct.2 | P_val_adj   | Cluster |
|---------------|----------|-------------|-------|-------|-------------|---------|
| ATM           | 1.89E-07 | 0.380625597 | 0.466 | 0.265 | 0.002955339 | 5       |
| DENND2D       | 2.43E-07 | 0.41669624  | 0.466 | 0.278 | 0.00381564  | 5       |
| JAK1          | 4.59E-07 | 0.49693986  | 0.466 | 0.297 | 0.007196221 | 5       |
| MT-ATP6       | 7.11E-07 | 0.273485264 | 0.939 | 0.902 | 0.011142771 | 5       |
| SERPINB1      | 8.31E-07 | 0.459395067 | 0.382 | 0.215 | 0.013029933 | 5       |
| POLR2L        | 9.52E-07 | 0.34938733  | 0.748 | 0.582 | 0.014928331 | 5       |
| RARRES3       | 2.10E-06 | 0.299213014 | 0.786 | 0.602 | 0.032849825 | 5       |
| PYHIN1        | 2.51E-06 | 0.38168525  | 0.557 | 0.361 | 0.039390676 | 5       |
| LITAF         | 3.09E-06 | 0.332462831 | 0.725 | 0.552 | 0.048403664 | 5       |
| GSTP1         | 3.69E-06 | 0.312085589 | 0.695 | 0.527 | 0.057884641 | 5       |
| ZAP70         | 3.90E-06 | 0.333450356 | 0.473 | 0.281 | 0.061090846 | 5       |
| C19orf66      | 4.01E-06 | 0.365663647 | 0.405 | 0.232 | 0.062854501 | 5       |
| LINC01420     | 4.48E-06 | 0.33042679  | 0.336 | 0.182 | 0.070153453 | 5       |
| ABI3          | 5.37E-06 | 0.421466294 | 0.351 | 0.199 | 0.084169892 | 5       |
| TPST2         | 6.32E-06 | 0.379004458 | 0.405 | 0.243 | 0.099086912 | 5       |
| ARPC5L        | 6.58E-06 | 0.340183247 | 0.489 | 0.31  | 0.10314337  | 5       |
| UTS2          | 7.27E-06 | 0.308559383 | 0.359 | 0.196 | 0.113958507 | 5       |
| DGKZ          | 7.83E-06 | 0.372212673 | 0.328 | 0.182 | 0.122752023 | 5       |
| ABHD17A       | 8.74E-06 | 0.368652933 | 0.275 | 0.142 | 0.13698167  | 5       |
| TRAPPC1       | 8.87E-06 | 0.293388167 | 0.672 | 0.501 | 0.139117989 | 5       |
| C5orf56       | 9.18E-06 | 0.357682753 | 0.405 | 0.241 | 0.143960702 | 5       |
| BIN2          | 1.12E-05 | 0.302913577 | 0.595 | 0.429 | 0.175530847 | 5       |
| CH17-189H20.1 | 1.23E-05 | 0.378639288 | 0.389 | 0.234 | 0.193241717 | 5       |
| MRPS6         | 1.28E-05 | 0.415751944 | 0.29  | 0.158 | 0.200013987 | 5       |
| PTPN4         | 1.34E-05 | 0.345211469 | 0.328 | 0.182 | 0.209925421 | 5       |
| OSTF1         | 1.60E-05 | 0.359786522 | 0.466 | 0.309 | 0.250794167 | 5       |
| TRABD         | 1.68E-05 | 0.362001761 | 0.366 | 0.218 | 0.263651356 | 5       |
| PIP4K2A       | 1.97E-05 | 0.364330074 | 0.389 | 0.238 | 0.308150254 | 5       |
| STARD3NL      | 2.45E-05 | 0.311088847 | 0.267 | 0.143 | 0.384372825 | 5       |
| CHD9          | 2.46E-05 | 0.33651378  | 0.29  | 0.156 | 0.386262147 | 5       |

Table S2 Continued

| Gene_marker | P_val       | Avg_logFC   | Pct.1 | Pct.2 | P_val_adj   | Cluster |
|-------------|-------------|-------------|-------|-------|-------------|---------|
| ADAM8       | 3.75E-05    | 0.362368516 | 0.275 | 0.147 | 0.587478838 | 5       |
| NDUFB2      | 3.96E-05    | 0.304792545 | 0.641 | 0.489 | 0.620516716 | 5       |
| PRDX5       | 4.57E-05    | 0.334724524 | 0.511 | 0.368 | 0.717105996 | 5       |
| NSMCE1      | 4.69E-05    | 0.320995917 | 0.321 | 0.185 | 0.734552756 | 5       |
| TIMM13      | 5.13E-05    | 0.378711811 | 0.298 | 0.172 | 0.804283977 | 5       |
| RNF213      | 5.35E-05    | 0.297797219 | 0.534 | 0.362 | 0.839000602 | 5       |
| IKZF1       | 5.35E-05    | 0.264925149 | 0.366 | 0.211 | 0.839414072 | 5       |
| DBI         | 5.46E-05    | 0.279015263 | 0.634 | 0.474 | 0.855362033 | 5       |
| CD2         | 5.68E-05    | 0.276679881 | 0.756 | 0.603 | 0.891088261 | 5       |
| STOM        | 5.75E-05    | 0.285265682 | 0.389 | 0.232 | 0.902060488 | 5       |
| ARID5A      | 5.80E-05    | 0.29568152  | 0.26  | 0.136 | 0.909369348 | 5       |
| C9orf142    | 5.89E-05    | 0.297243595 | 0.58  | 0.419 | 0.92322652  | 5       |
| ARL4C       | 6.49E-05    | 0.365658545 | 0.466 | 0.309 | 1           | 5       |
| LPCAT1      | 6.75E-05    | 0.25880793  | 0.26  | 0.134 | 1           | 5       |
| SEC11A      | 7.92E-05    | 0.277924268 | 0.473 | 0.312 | 1           | 5       |
| TCEB2       | 8.72E-05    | 0.260370067 | 0.786 | 0.697 | 1           | 5       |
| SUN2        | 0.000101264 | 0.300784918 | 0.58  | 0.436 | 1           | 5       |
| AKNA        | 0.00011485  | 0.350768827 | 0.412 | 0.279 | 1           | 5       |
| NARF        | 0.000130591 | 0.270390699 | 0.252 | 0.137 | 1           | 5       |
| SERBP1      | 0.000162861 | 0.33859728  | 0.534 | 0.389 | 1           | 5       |
| CD164       | 0.000200579 | 0.272052389 | 0.634 | 0.489 | 1           | 5       |
| RUNX3       | 0.000218807 | 0.265998296 | 0.26  | 0.142 | 1           | 5       |
| RBM8A       | 0.00025086  | 0.317731237 | 0.473 | 0.349 | 1           | 5       |
| PPP1R18     | 0.000254328 | 0.270596527 | 0.534 | 0.398 | 1           | 5       |
| APMAP       | 0.000273618 | 0.35413775  | 0.42  | 0.277 | 1           | 5       |
| ITGAL       | 0.000342897 | 0.250972562 | 0.359 | 0.217 | 1           | 5       |
| CPNE1       | 0.000351174 | 0.279597836 | 0.313 | 0.189 | 1           | 5       |
| GIMAP6      | 0.000352532 | 0.276963239 | 0.275 | 0.161 | 1           | 5       |
| TPI1        | 0.000372132 | 0.31225363  | 0.595 | 0.475 | 1           | 5       |
| TGFB1       | 0.000391833 | 0.270346615 | 0.275 | 0.158 | 1           | 5       |

Table S2 Continued

| Gene_marker | P_val       | Avg_logFC   | Pct.1 | Pct.2 | P_val_adj | Cluster |
|-------------|-------------|-------------|-------|-------|-----------|---------|
| LGALS1      | 0.00044951  | 0.320556203 | 0.557 | 0.44  | 1         | 5       |
| PYCARD      | 0.000484197 | 0.260546629 | 0.435 | 0.295 | 1         | 5       |
| DR1         | 0.000593854 | 0.271749296 | 0.282 | 0.175 | 1         | 5       |
| CAST        | 0.00060675  | 0.348354628 | 0.344 | 0.225 | 1         | 5       |
| PSMA1       | 0.000641724 | 0.256204033 | 0.458 | 0.325 | 1         | 5       |
| LSM2        | 0.000665238 | 0.256632758 | 0.305 | 0.192 | 1         | 5       |
| DYNLRB1     | 0.000699316 | 0.295730973 | 0.427 | 0.304 | 1         | 5       |
| SPN         | 0.00071822  | 0.26191142  | 0.374 | 0.25  | 1         | 5       |
| WDR74       | 0.000742919 | 0.317268242 | 0.282 | 0.176 | 1         | 5       |
| FCRL6       | 0.000829888 | 0.250552878 | 0.267 | 0.157 | 1         | 5       |
| CCDC85B     | 0.000941759 | 0.281903146 | 0.443 | 0.326 | 1         | 5       |
| COX7A2L     | 0.000946284 | 0.262154019 | 0.557 | 0.416 | 1         | 5       |
| IL10RA      | 0.0010297   | 0.31737324  | 0.427 | 0.314 | 1         | 5       |
| MBP         | 0.001129941 | 0.295789417 | 0.405 | 0.286 | 1         | 5       |
| SLA         | 0.001227328 | 0.258717094 | 0.328 | 0.209 | 1         | 5       |
| ATF4        | 0.001294782 | 0.259946079 | 0.305 | 0.197 | 1         | 5       |
| FLOT1       | 0.001344158 | 0.267233423 | 0.282 | 0.176 | 1         | 5       |
| CLK1        | 0.00146978  | 0.250245608 | 0.382 | 0.264 | 1         | 5       |
| SIGIRR      | 0.001477674 | 0.274665926 | 0.45  | 0.333 | 1         | 5       |
| SAP18       | 0.001516558 | 0.251891551 | 0.55  | 0.428 | 1         | 5       |
| DHRS7       | 0.001556288 | 0.273191265 | 0.382 | 0.27  | 1         | 5       |
| EIF3J       | 0.001799743 | 0.288313114 | 0.374 | 0.271 | 1         | 5       |
| DYNLL1      | 0.00182394  | 0.264133134 | 0.557 | 0.434 | 1         | 5       |
| MAP1LC3B    | 0.001948835 | 0.253635669 | 0.412 | 0.29  | 1         | 5       |
| CCND3       | 0.002161163 | 0.3006491   | 0.565 | 0.445 | 1         | 5       |
| DOK2        | 0.002238324 | 0.335931454 | 0.443 | 0.328 | 1         | 5       |
| SPCS3       | 0.002418507 | 0.251397731 | 0.282 | 0.182 | 1         | 5       |
| UBE2L6      | 0.002807822 | 0.259034553 | 0.435 | 0.32  | 1         | 5       |
| FIS1        | 0.003422225 | 0.251575135 | 0.382 | 0.277 | 1         | 5       |
| CCDC69      | 0.003695378 | 0.259118288 | 0.282 | 0.189 | 1         | 5       |

Table S2 Continued

| Gene_marker  | P_val       | Avg_logFC   | Pct.1 | Pct.2 | P_val_adj | Cluster |
|--------------|-------------|-------------|-------|-------|-----------|---------|
| SHKBP1       | 0.003909192 | 0.258775933 | 0.29  | 0.191 | 1         | 5       |
| CTDSP1       | 0.003925109 | 0.257071137 | 0.252 | 0.163 | 1         | 5       |
| TMEM134      | 0.003966342 | 0.273189522 | 0.252 | 0.164 | 1         | 5       |
| ETS1         | 0.004744757 | 0.273991681 | 0.359 | 0.252 | 1         | 5       |
| VAMP8        | 0.005304367 | 0.289326618 | 0.542 | 0.438 | 1         | 5       |
| VPS29        | 0.006105706 | 0.266601322 | 0.321 | 0.228 | 1         | 5       |
| EIF3G        | 0.006959053 | 0.272940792 | 0.542 | 0.452 | 1         | 5       |
| FLNA         | 0.008539399 | 0.317338835 | 0.366 | 0.287 | 1         | 5       |
| TNFRSF17     | 0           | 1.110566148 | 0.781 | 0.009 | 0         | 6       |
| TXNDC5       | 0           | 0.535638049 | 0.562 | 0.005 | 0         | 6       |
| SDC1         | 0           | 0.505858246 | 0.589 | 0.003 | 0         | 6       |
| SPAG4        | 0           | 0.440217791 | 0.507 | 0.003 | 0         | 6       |
| RP11-16E12.2 | 8.89E-282   | 0.39051497  | 0.397 | 0.002 | 1.39E-277 | 6       |
| TRIB1        | 3.76E-257   | 0.562106926 | 0.589 | 0.01  | 5.89E-253 | 6       |
| GAS6         | 9.70E-256   | 0.264306953 | 0.411 | 0.003 | 1.52E-251 | 6       |
| JSRP1        | 1.33E-255   | 0.810301936 | 0.548 | 0.008 | 2.09E-251 | 6       |
| EAF2         | 9.90E-252   | 0.74974738  | 0.685 | 0.016 | 1.55E-247 | 6       |
| PYCR1        | 1.63E-243   | 0.288353193 | 0.37  | 0.002 | 2.56E-239 | 6       |
| GNG7         | 2.68E-228   | 0.611336075 | 0.616 | 0.014 | 4.20E-224 | 6       |
| DERL3        | 5.07E-178   | 1.644166938 | 0.973 | 0.065 | 7.94E-174 | 6       |
| ELL2         | 7.06E-165   | 0.365533765 | 0.411 | 0.008 | 1.11E-160 | 6       |
| CHPF         | 1.94E-159   | 0.431084142 | 0.534 | 0.017 | 3.04E-155 | 6       |
| QPRT         | 2.03E-153   | 0.274090851 | 0.384 | 0.008 | 3.18E-149 | 6       |
| IGKV1-12     | 2.26E-149   | 1.279742679 | 0.452 | 0.013 | 3.54E-145 | 6       |
| KIAA0125     | 1.47E-139   | 0.71341401  | 0.411 | 0.011 | 2.30E-135 | 6       |
| CPNE5        | 2.34E-123   | 0.34041057  | 0.425 | 0.014 | 3.66E-119 | 6       |
| PRDX4        | 1.40E-119   | 1.250268974 | 0.877 | 0.08  | 2.19E-115 | 6       |
| SEMA4A       | 1.03E-112   | 0.324466381 | 0.37  | 0.011 | 1.61E-108 | 6       |
| CD38         | 6.19E-108   | 0.588450598 | 0.753 | 0.056 | 9.70E-104 | 6       |
| IGLV3-1      | 9.69E-108   | 0.316619374 | 0.329 | 0.009 | 1.52E-103 | 6       |

Table S2 Continued

| Gene_marker | P_val     | Avg_logFC   | Pct.1 | Pct.2 | P_val_adj | Cluster |
|-------------|-----------|-------------|-------|-------|-----------|---------|
| PDK1        | 7.79E-106 | 0.423721429 | 0.562 | 0.032 | 1.22E-101 | 6       |
| CKAP4       | 1.76E-100 | 0.276605211 | 0.342 | 0.011 | 2.76E-96  | 6       |
| MZB1        | 1.17E-99  | 2.711108644 | 1     | 0.178 | 1.84E-95  | 6       |
| TXNDC11     | 6.17E-97  | 0.702708868 | 0.781 | 0.068 | 9.67E-93  | 6       |
| MEF2C       | 7.60E-89  | 0.589655995 | 0.726 | 0.064 | 1.19E-84  | 6       |
| RASGRP3     | 7.61E-85  | 0.294264409 | 0.288 | 0.009 | 1.19E-80  | 6       |
| ANKRD28     | 3.70E-82  | 0.381987418 | 0.548 | 0.04  | 5.79E-78  | 6       |
| SEL1L3      | 2.16E-81  | 0.556122924 | 0.699 | 0.065 | 3.39E-77  | 6       |
| ITM2C       | 9.70E-77  | 1.304086053 | 0.986 | 0.164 | 1.52E-72  | 6       |
| SEC14L1     | 8.01E-75  | 0.293779748 | 0.521 | 0.039 | 1.26E-70  | 6       |
| JCHAIN      | 2.47E-73  | 4.089093936 | 0.795 | 0.113 | 3.87E-69  | 6       |
| TXNDC15     | 2.49E-73  | 0.346018086 | 0.63  | 0.057 | 3.90E-69  | 6       |
| SPATS2      | 1.35E-71  | 0.317092918 | 0.452 | 0.031 | 2.12E-67  | 6       |
| UBE2J1      | 6.16E-67  | 0.947665303 | 0.863 | 0.123 | 9.65E-63  | 6       |
| SEL1L       | 2.16E-66  | 0.294303842 | 0.493 | 0.04  | 3.39E-62  | 6       |
| CD59        | 2.55E-64  | 0.556510903 | 0.616 | 0.064 | 4.00E-60  | 6       |
| SIL1        | 2.54E-58  | 0.304907047 | 0.479 | 0.043 | 3.99E-54  | 6       |
| ARSA        | 6.05E-58  | 0.336735179 | 0.603 | 0.066 | 9.48E-54  | 6       |
| HIST1H2BG   | 7.66E-58  | 0.324285795 | 0.288 | 0.016 | 1.20E-53  | 6       |
| CRELD2      | 3.13E-57  | 0.590437309 | 0.74  | 0.099 | 4.90E-53  | 6       |
| DNAJB9      | 3.77E-56  | 0.733527434 | 0.822 | 0.123 | 5.90E-52  | 6       |
| FAM46C      | 5.05E-55  | 0.473027672 | 0.658 | 0.082 | 7.92E-51  | 6       |
| CREB3L2     | 6.98E-55  | 0.251392162 | 0.493 | 0.048 | 1.09E-50  | 6       |
| SRPRB       | 2.99E-54  | 0.32431765  | 0.589 | 0.067 | 4.68E-50  | 6       |
| GMPPB       | 5.85E-53  | 0.319575312 | 0.562 | 0.063 | 9.17E-49  | 6       |
| LMAN1       | 1.15E-51  | 0.460372286 | 0.753 | 0.108 | 1.81E-47  | 6       |
| TNFRSF13B   | 1.31E-50  | 0.274616043 | 0.384 | 0.032 | 2.05E-46  | 6       |
| SSR4        | 7.19E-50  | 1.877800812 | 1     | 0.645 | 1.13E-45  | 6       |
| FCRL5       | 2.43E-49  | 0.296049159 | 0.466 | 0.047 | 3.81E-45  | 6       |
| LY96        | 2.10E-48  | 0.336232806 | 0.671 | 0.092 | 3.30E-44  | 6       |



Table S2 Continued

| Gene_marker | P_val    | Avg_logFC   | Pct.1 | Pct.2 | P_val_adj | Cluster |
|-------------|----------|-------------|-------|-------|-----------|---------|
| FKBP2       | 8.98E-47 | 1.058075859 | 0.932 | 0.214 | 1.41E-42  | 6       |
| PLPP5       | 5.53E-46 | 0.442195772 | 0.63  | 0.088 | 8.67E-42  | 6       |
| CECR1       | 1.52E-45 | 0.263924544 | 0.562 | 0.071 | 2.38E-41  | 6       |
| ZBP1        | 3.93E-45 | 0.359807006 | 0.603 | 0.081 | 6.16E-41  | 6       |
| FKBP11      | 8.58E-45 | 1.292225199 | 0.904 | 0.255 | 1.34E-40  | 6       |
| SEC11C      | 1.91E-44 | 1.057319406 | 0.918 | 0.22  | 2.99E-40  | 6       |
| XBP1        | 4.38E-44 | 1.361604091 | 0.959 | 0.311 | 6.87E-40  | 6       |
| SPCS3       | 9.38E-44 | 0.808667372 | 0.863 | 0.173 | 1.47E-39  | 6       |
| IGKV3-15    | 1.65E-40 | 0.439758659 | 0.301 | 0.026 | 2.59E-36  | 6       |
| HERPUD1     | 7.41E-40 | 1.244777479 | 0.986 | 0.333 | 1.16E-35  | 6       |
| TPD52       | 3.56E-39 | 0.288803467 | 0.685 | 0.111 | 5.59E-35  | 6       |
| PDIA4       | 1.04E-38 | 0.768006518 | 0.836 | 0.174 | 1.63E-34  | 6       |
| SSR3        | 2.89E-38 | 0.714707297 | 0.863 | 0.184 | 4.53E-34  | 6       |
| NPC2        | 3.65E-38 | 0.617570744 | 0.904 | 0.191 | 5.72E-34  | 6       |
| IGHG2       | 1.03E-36 | 2.164210259 | 0.699 | 0.149 | 1.62E-32  | 6       |
| ERLEC1      | 1.48E-36 | 0.46846779  | 0.795 | 0.152 | 2.32E-32  | 6       |
| HM13        | 1.36E-35 | 0.441673502 | 0.795 | 0.154 | 2.14E-31  | 6       |
| MANF        | 2.76E-35 | 0.790530232 | 0.877 | 0.202 | 4.32E-31  | 6       |
| KDELRL1     | 8.02E-35 | 0.286659442 | 0.753 | 0.139 | 1.26E-30  | 6       |
| PABPC4      | 1.34E-34 | 0.455020623 | 0.753 | 0.147 | 2.09E-30  | 6       |
| IGLV6-57    | 3.81E-34 | 0.703982526 | 0.479 | 0.07  | 5.97E-30  | 6       |
| DNAJB11     | 3.33E-33 | 0.251747579 | 0.603 | 0.102 | 5.22E-29  | 6       |
| HDLBP       | 5.40E-33 | 0.294041836 | 0.479 | 0.071 | 8.46E-29  | 6       |
| HSP90B1     | 1.80E-30 | 1.03043488  | 0.973 | 0.365 | 2.82E-26  | 6       |
| SELM        | 2.63E-29 | 0.390527022 | 0.671 | 0.136 | 4.12E-25  | 6       |
| IGKV3-20    | 1.17E-28 | 0.4474702   | 0.589 | 0.114 | 1.84E-24  | 6       |
| IGHA2       | 3.41E-28 | 1.946985611 | 0.712 | 0.148 | 5.34E-24  | 6       |
| VIMP        | 4.49E-28 | 0.565840479 | 0.89  | 0.227 | 7.04E-24  | 6       |
| SDF2L1      | 5.84E-28 | 0.560508606 | 0.808 | 0.194 | 9.15E-24  | 6       |
| MYDGF       | 4.05E-26 | 0.627595575 | 0.877 | 0.239 | 6.36E-22  | 6       |

Table S2 Continued

| Gene_marker | P_val      | Avg_logFC   | Pct.1 | Pct.2 | P_val_adj   | Cluster |
|-------------|------------|-------------|-------|-------|-------------|---------|
| CD79A       | 1.65E-24   | 0.374109271 | 0.932 | 0.261 | 2.59E-20    | 6       |
| ARF4        | 3.18E-24   | 0.275991622 | 0.767 | 0.18  | 4.98E-20    | 6       |
| IGHG1       | 2.15E-23   | 4.656961088 | 0.959 | 0.764 | 3.38E-19    | 6       |
| IGHG4       | 2.41E-23   | 4.459287464 | 1     | 0.974 | 3.79E-19    | 6       |
| IGKC        | 3.59E-23   | 4.795639548 | 1     | 0.995 | 5.63E-19    | 6       |
| IFI6        | 3.73E-23   | 0.307820817 | 0.589 | 0.129 | 5.84E-19    | 6       |
| NUCB2       | 1.64E-21   | 0.373230124 | 0.74  | 0.19  | 2.57E-17    | 6       |
| SELK        | 5.45E-21   | 0.61577799  | 0.932 | 0.305 | 8.55E-17    | 6       |
| RNASE6      | 2.40E-20   | 0.264504965 | 0.37  | 0.067 | 3.76E-16    | 6       |
| IGLV3-21    | 4.94E-20   | 0.355488903 | 0.411 | 0.08  | 7.74E-16    | 6       |
| KDEL2       | 1.05E-19   | 0.26920995  | 0.726 | 0.187 | 1.65E-15    | 6       |
| IGKV1-5     | 2.29E-18   | 0.574151726 | 0.356 | 0.069 | 3.59E-14    | 6       |
| IGHG3       | 4.90E-18   | 3.651307515 | 0.904 | 0.354 | 7.68E-14    | 6       |
| ATF4        | 1.19E-17   | 0.251447012 | 0.699 | 0.191 | 1.87E-13    | 6       |
| PIM2        | 2.32E-16   | 0.289600758 | 0.726 | 0.216 | 3.63E-12    | 6       |
| OSTC        | 1.40E-15   | 0.25467129  | 0.822 | 0.254 | 2.19E-11    | 6       |
| LMAN2       | 2.95E-15   | 0.346821754 | 0.89  | 0.296 | 4.62E-11    | 6       |
| HSPA5       | 4.92E-15   | 0.493755595 | 0.808 | 0.268 | 7.71E-11    | 6       |
| SPCS1       | 1.80E-14   | 0.554935185 | 0.932 | 0.494 | 2.82E-10    | 6       |
| IGKV4-1     | 4.68E-14   | 0.331924001 | 0.37  | 0.089 | 7.34E-10    | 6       |
| CITED2      | 1.26E-13   | 0.554862632 | 0.712 | 0.258 | 1.98E-09    | 6       |
| IGKV1-39    | 2.13E-13   | 0.633583462 | 0.26  | 0.053 | 3.33E-09    | 6       |
| PDIA6       | 1.72E-12   | 0.321591091 | 0.836 | 0.287 | 2.69E-08    | 6       |
| SPCS2       | 2.59E-12   | 0.561580207 | 0.918 | 0.469 | 4.06E-08    | 6       |
| IGHV1-2     | 1.66E-10   | 0.688256229 | 0.342 | 0.093 | 2.60E-06    | 6       |
| IGLC3       | 2.33E-06   | 3.176393671 | 0.932 | 0.484 | 0.036538105 | 6       |
| IGHA1       | 3.46E-06   | 4.36483451  | 0.973 | 0.601 | 0.054182562 | 6       |
| PPIB        | 2.18E-05   | 0.549831223 | 0.959 | 0.531 | 0.34133864  | 6       |
| IGHM        | 0.00203133 | 3.335341371 | 0.836 | 0.45  | 1           | 6       |
| TYMS        | 1.74E-266  | 1.149808384 | 0.522 | 0.006 | 2.72E-262   | 7       |

Table S2 Continued

| Gene_marker | P_val     | Avg_logFC   | Pct.1 | Pct.2 | P_val_adj | Cluster |
|-------------|-----------|-------------|-------|-------|-----------|---------|
| KIAA0101    | 3.17E-224 | 1.453773822 | 0.667 | 0.018 | 4.97E-220 | 7       |
| BIRC5       | 1.26E-204 | 0.907430036 | 0.391 | 0.004 | 1.97E-200 | 7       |
| MKI67       | 2.57E-190 | 1.17438697  | 0.449 | 0.008 | 4.03E-186 | 7       |
| CDC20       | 1.74E-179 | 0.681787552 | 0.275 | 0.002 | 2.73E-175 | 7       |
| ZWINT       | 3.60E-179 | 1.173900193 | 0.565 | 0.016 | 5.64E-175 | 7       |
| CDK1        | 2.17E-148 | 0.700332215 | 0.319 | 0.005 | 3.40E-144 | 7       |
| TK1         | 1.22E-146 | 0.908010238 | 0.362 | 0.007 | 1.91E-142 | 7       |
| AURKB       | 8.06E-133 | 0.755535192 | 0.29  | 0.004 | 1.26E-128 | 7       |
| CCNB2       | 5.54E-129 | 0.756060182 | 0.261 | 0.003 | 8.69E-125 | 7       |
| CLSPN       | 4.04E-122 | 0.65281055  | 0.304 | 0.006 | 6.34E-118 | 7       |
| CENPF       | 2.07E-110 | 1.41968494  | 0.333 | 0.009 | 3.25E-106 | 7       |
| RRM2        | 8.33E-97  | 0.803146367 | 0.29  | 0.008 | 1.31E-92  | 7       |
| TOP2A       | 9.87E-96  | 1.497996159 | 0.304 | 0.009 | 1.55E-91  | 7       |
| HMGB3       | 9.88E-93  | 0.846449642 | 0.348 | 0.013 | 1.55E-88  | 7       |
| CDKN3       | 1.06E-88  | 0.63930761  | 0.275 | 0.008 | 1.66E-84  | 7       |
| CENPU       | 1.08E-88  | 0.622164268 | 0.275 | 0.008 | 1.70E-84  | 7       |
| ORC6        | 9.67E-87  | 0.62059914  | 0.333 | 0.012 | 1.52E-82  | 7       |
| STMN1       | 3.45E-85  | 2.297809923 | 0.971 | 0.172 | 5.41E-81  | 7       |
| UBE2C       | 4.04E-82  | 0.998639695 | 0.275 | 0.009 | 6.33E-78  | 7       |
| MYBL2       | 1.34E-81  | 0.599695553 | 0.261 | 0.008 | 2.09E-77  | 7       |
| RAD51AP1    | 3.41E-81  | 0.496837528 | 0.275 | 0.009 | 5.34E-77  | 7       |
| CENPW       | 5.90E-78  | 0.57803599  | 0.304 | 0.012 | 9.25E-74  | 7       |
| BRCA1       | 3.83E-76  | 0.566335855 | 0.304 | 0.012 | 6.01E-72  | 7       |
| GGH         | 6.47E-74  | 0.487802424 | 0.29  | 0.011 | 1.01E-69  | 7       |
| NUSAP1      | 3.81E-65  | 0.872556051 | 0.275 | 0.012 | 5.97E-61  | 7       |
| LMNB1       | 5.68E-56  | 0.685412585 | 0.449 | 0.039 | 8.90E-52  | 7       |
| MCM7        | 3.93E-54  | 0.949826267 | 0.58  | 0.07  | 6.16E-50  | 7       |
| DHFR        | 4.48E-53  | 0.58796964  | 0.362 | 0.027 | 7.03E-49  | 7       |
| NREP        | 2.27E-50  | 0.463448242 | 0.29  | 0.018 | 3.57E-46  | 7       |
| CKS1B       | 2.58E-47  | 1.049814082 | 0.464 | 0.052 | 4.04E-43  | 7       |

Table S2 Continued

| Gene_marker | P_val    | Avg_logFC   | Pct.1 | Pct.2 | P_val_adj | Cluster |
|-------------|----------|-------------|-------|-------|-----------|---------|
| TUBA1B      | 1.44E-46 | 1.991089895 | 0.986 | 0.367 | 2.26E-42  | 7       |
| YEATS4      | 1.61E-46 | 0.649626759 | 0.435 | 0.044 | 2.52E-42  | 7       |
| PCNA        | 3.29E-45 | 1.03961907  | 0.536 | 0.072 | 5.15E-41  | 7       |
| HELLS       | 6.45E-44 | 0.841545237 | 0.435 | 0.048 | 1.01E-39  | 7       |
| HMGB2       | 4.37E-38 | 2.061483707 | 0.913 | 0.351 | 6.85E-34  | 7       |
| MDK         | 2.86E-36 | 1.287873859 | 0.565 | 0.103 | 4.48E-32  | 7       |
| H2AFZ       | 1.49E-35 | 1.385411674 | 0.986 | 0.474 | 2.34E-31  | 7       |
| CKS2        | 1.03E-34 | 0.935403319 | 0.478 | 0.074 | 1.62E-30  | 7       |
| TUBB        | 3.56E-34 | 1.612038781 | 0.942 | 0.4   | 5.58E-30  | 7       |
| HMG2        | 2.80E-32 | 1.348179172 | 1     | 0.665 | 4.39E-28  | 7       |
| NASP        | 2.80E-32 | 0.857084556 | 0.623 | 0.127 | 4.40E-28  | 7       |
| SMC2        | 3.19E-32 | 0.581398167 | 0.333 | 0.038 | 5.00E-28  | 7       |
| MCM3        | 3.98E-32 | 0.628655525 | 0.435 | 0.063 | 6.24E-28  | 7       |
| CARHSP1     | 4.66E-31 | 0.842077465 | 0.739 | 0.173 | 7.31E-27  | 7       |
| PTTG1       | 1.23E-29 | 1.197064676 | 0.435 | 0.074 | 1.92E-25  | 7       |
| TCL1A       | 1.45E-29 | 1.191313204 | 0.478 | 0.089 | 2.28E-25  | 7       |
| EZH2        | 4.99E-29 | 0.491518799 | 0.304 | 0.035 | 7.81E-25  | 7       |
| ITGB3BP     | 1.06E-28 | 0.528138656 | 0.406 | 0.06  | 1.67E-24  | 7       |
| MCM5        | 1.45E-27 | 0.723040795 | 0.391 | 0.06  | 2.28E-23  | 7       |
| CDCA7L      | 1.81E-26 | 0.545503441 | 0.362 | 0.053 | 2.83E-22  | 7       |
| MAD2L1      | 4.60E-26 | 0.690393219 | 0.377 | 0.058 | 7.22E-22  | 7       |
| NUDT1       | 9.34E-26 | 0.617769287 | 0.493 | 0.093 | 1.46E-21  | 7       |
| RANBP1      | 7.34E-25 | 0.806610228 | 0.87  | 0.295 | 1.15E-20  | 7       |
| IGLC6       | 1.27E-24 | 1.457675486 | 0.609 | 0.17  | 1.99E-20  | 7       |
| PTMA        | 1.32E-24 | 0.661983799 | 1     | 0.999 | 2.07E-20  | 7       |
| CENPM       | 4.51E-24 | 0.475574168 | 0.275 | 0.034 | 7.07E-20  | 7       |
| DTYMK       | 5.57E-24 | 0.472899767 | 0.362 | 0.056 | 8.73E-20  | 7       |
| HMGB1       | 1.03E-23 | 0.995879835 | 1     | 0.853 | 1.62E-19  | 7       |
| CENPH       | 2.71E-22 | 0.4204181   | 0.261 | 0.033 | 4.25E-18  | 7       |
| FCRLA       | 4.63E-22 | 0.687406974 | 0.362 | 0.064 | 7.26E-18  | 7       |

Table S2 Continued

| Gene_marker | P_val    | Avg_logFC   | Pct.1 | Pct.2 | P_val_adj | Cluster |
|-------------|----------|-------------|-------|-------|-----------|---------|
| RNASEH2A    | 1.66E-21 | 0.370755648 | 0.275 | 0.038 | 2.60E-17  | 7       |
| SYK         | 4.38E-21 | 0.456424694 | 0.275 | 0.039 | 6.86E-17  | 7       |
| CBX5        | 7.23E-21 | 0.557193772 | 0.42  | 0.083 | 1.13E-16  | 7       |
| TUBA1C      | 1.12E-20 | 0.432267697 | 0.29  | 0.043 | 1.75E-16  | 7       |
| TRAF4       | 1.38E-20 | 0.607528269 | 0.348 | 0.062 | 2.16E-16  | 7       |
| RPA3        | 2.84E-20 | 0.682117268 | 0.594 | 0.158 | 4.45E-16  | 7       |
| DUT         | 2.93E-20 | 0.925991613 | 0.696 | 0.248 | 4.59E-16  | 7       |
| FCRL2       | 2.12E-19 | 0.710630797 | 0.449 | 0.105 | 3.32E-15  | 7       |
| CLECL1      | 3.61E-19 | 0.845711061 | 0.464 | 0.116 | 5.66E-15  | 7       |
| DEK         | 4.12E-19 | 0.813493668 | 0.855 | 0.372 | 6.45E-15  | 7       |
| HAT1        | 5.40E-19 | 0.496125869 | 0.493 | 0.114 | 8.47E-15  | 7       |
| HIST1H4C    | 5.64E-19 | 1.720015824 | 0.623 | 0.206 | 8.85E-15  | 7       |
| ST14        | 1.31E-18 | 0.485120512 | 0.275 | 0.044 | 2.06E-14  | 7       |
| H3F3A       | 3.50E-18 | 0.674090574 | 1     | 0.881 | 5.49E-14  | 7       |
| MARCKS      | 3.58E-18 | 0.640822089 | 0.391 | 0.085 | 5.60E-14  | 7       |
| SMC4        | 3.97E-18 | 0.646065524 | 0.435 | 0.101 | 6.23E-14  | 7       |
| ANP32B      | 1.50E-17 | 0.813950802 | 0.797 | 0.36  | 2.36E-13  | 7       |
| TUBB4B      | 1.63E-17 | 0.768852022 | 0.42  | 0.099 | 2.55E-13  | 7       |
| H2AFY       | 3.54E-17 | 0.63406173  | 0.696 | 0.225 | 5.55E-13  | 7       |
| PDLIM1      | 3.91E-17 | 0.728366894 | 0.507 | 0.139 | 6.13E-13  | 7       |
| ANP32E      | 5.56E-17 | 0.677142684 | 0.565 | 0.163 | 8.72E-13  | 7       |
| H2AFV       | 6.40E-17 | 0.811738345 | 0.71  | 0.273 | 1.00E-12  | 7       |
| MFAP1       | 7.15E-17 | 0.288048205 | 0.261 | 0.042 | 1.12E-12  | 7       |
| MS4A1       | 1.73E-16 | 1.162497982 | 0.638 | 0.248 | 2.71E-12  | 7       |
| RPL39L      | 1.76E-16 | 0.443357636 | 0.29  | 0.053 | 2.76E-12  | 7       |
| MARCKSL1    | 2.48E-16 | 0.757168944 | 0.652 | 0.231 | 3.89E-12  | 7       |
| SMIM14      | 2.94E-16 | 0.863055509 | 0.551 | 0.18  | 4.61E-12  | 7       |
| HLA-DRA     | 4.54E-16 | 0.746101745 | 0.986 | 0.612 | 7.12E-12  | 7       |
| LSM5        | 6.94E-16 | 0.730726681 | 0.739 | 0.291 | 1.09E-11  | 7       |
| MYL6B       | 1.19E-15 | 0.356762504 | 0.304 | 0.059 | 1.87E-11  | 7       |

Table S2 Continued

| Gene_marker | P_val    | Avg_logFC   | Pct.1 | Pct.2 | P_val_adj | Cluster |
|-------------|----------|-------------|-------|-------|-----------|---------|
| CBX3        | 1.48E-15 | 0.666868285 | 0.884 | 0.467 | 2.32E-11  | 7       |
| SAE1        | 1.80E-15 | 0.34975176  | 0.333 | 0.068 | 2.82E-11  | 7       |
| VPREB3      | 2.36E-15 | 0.830338971 | 0.565 | 0.188 | 3.69E-11  | 7       |
| GTF3C5      | 2.80E-15 | 0.284049832 | 0.29  | 0.054 | 4.39E-11  | 7       |
| SMC6        | 3.11E-15 | 0.396768656 | 0.348 | 0.076 | 4.88E-11  | 7       |
| CCND1       | 3.44E-15 | 0.969993681 | 0.565 | 0.201 | 5.39E-11  | 7       |
| FABP5       | 4.82E-15 | 0.6818172   | 0.435 | 0.117 | 7.56E-11  | 7       |
| HMGNI       | 5.28E-15 | 0.625142124 | 0.942 | 0.661 | 8.28E-11  | 7       |
| ANXA5       | 5.76E-15 | 0.525765388 | 0.667 | 0.221 | 9.03E-11  | 7       |
| CD24        | 7.42E-15 | 0.638663763 | 0.449 | 0.124 | 1.16E-10  | 7       |
| PKM         | 9.05E-15 | 0.69468829  | 0.899 | 0.431 | 1.42E-10  | 7       |
| NUCKS1      | 9.14E-15 | 0.741354925 | 0.754 | 0.285 | 1.43E-10  | 7       |
| GAPDH       | 1.88E-14 | 0.743400516 | 0.971 | 0.88  | 2.95E-10  | 7       |
| CXXC5       | 2.40E-14 | 0.455411318 | 0.319 | 0.07  | 3.75E-10  | 7       |
| SIVA1       | 2.62E-14 | 0.640679949 | 0.696 | 0.272 | 4.11E-10  | 7       |
| SPTBN1      | 4.62E-14 | 0.429494144 | 0.261 | 0.05  | 7.24E-10  | 7       |
| RAN         | 4.84E-14 | 0.671980636 | 0.855 | 0.404 | 7.59E-10  | 7       |
| BCL2L12     | 1.67E-13 | 0.290647805 | 0.261 | 0.051 | 2.62E-09  | 7       |
| IGLC7       | 1.81E-13 | 1.055631663 | 0.565 | 0.224 | 2.84E-09  | 7       |
| DNAJC9      | 1.91E-13 | 0.411049099 | 0.348 | 0.083 | 3.00E-09  | 7       |
| FADS3       | 2.15E-13 | 0.583577161 | 0.362 | 0.092 | 3.38E-09  | 7       |
| CDCA4       | 2.18E-13 | 0.37121698  | 0.275 | 0.056 | 3.42E-09  | 7       |
| YWHAH       | 3.43E-13 | 0.4772426   | 0.565 | 0.18  | 5.38E-09  | 7       |
| TFDP1       | 4.93E-13 | 0.503599219 | 0.377 | 0.099 | 7.72E-09  | 7       |
| CD74        | 4.96E-13 | 0.573761984 | 1     | 0.937 | 7.77E-09  | 7       |
| SMC3        | 5.31E-13 | 0.372753958 | 0.42  | 0.111 | 8.32E-09  | 7       |
| TMPO        | 5.78E-13 | 0.451050867 | 0.391 | 0.104 | 9.05E-09  | 7       |
| ACADM       | 1.14E-12 | 0.691655439 | 0.507 | 0.172 | 1.78E-08  | 7       |
| SMARCB1     | 1.26E-12 | 0.464889278 | 0.565 | 0.188 | 1.98E-08  | 7       |
| ARL6IP6     | 1.36E-12 | 0.474507723 | 0.42  | 0.118 | 2.14E-08  | 7       |

Table S2 Continued

| Gene_marker | P_val    | Avg_logFC   | Pct.1 | Pct.2 | P_val_adj | Cluster |
|-------------|----------|-------------|-------|-------|-----------|---------|
| CBX1        | 1.55E-12 | 0.345660125 | 0.362 | 0.091 | 2.43E-08  | 7       |
| ARHGAP24    | 1.78E-12 | 0.518551733 | 0.362 | 0.096 | 2.80E-08  | 7       |
| ZNF444      | 1.88E-12 | 0.338663816 | 0.261 | 0.054 | 2.94E-08  | 7       |
| DNMT1       | 2.10E-12 | 0.352555576 | 0.377 | 0.097 | 3.30E-08  | 7       |
| EXOSC8      | 2.14E-12 | 0.420322446 | 0.348 | 0.087 | 3.35E-08  | 7       |
| MZB1        | 2.62E-12 | 0.416479765 | 0.551 | 0.186 | 4.11E-08  | 7       |
| CCDC50      | 2.97E-12 | 0.573917832 | 0.348 | 0.093 | 4.66E-08  | 7       |
| HNRNPA2B1   | 3.65E-12 | 0.560379411 | 0.942 | 0.718 | 5.72E-08  | 7       |
| ACTL6A      | 3.68E-12 | 0.287968313 | 0.261 | 0.055 | 5.77E-08  | 7       |
| BANK1       | 4.11E-12 | 0.471088403 | 0.333 | 0.086 | 6.44E-08  | 7       |
| CENPK       | 4.34E-12 | 0.322883634 | 0.29  | 0.065 | 6.80E-08  | 7       |
| ILF2        | 6.51E-12 | 0.474013466 | 0.522 | 0.176 | 1.02E-07  | 7       |
| KIF20B      | 6.63E-12 | 0.455623876 | 0.304 | 0.074 | 1.04E-07  | 7       |
| GSTP1       | 6.69E-12 | 0.615119335 | 0.913 | 0.526 | 1.05E-07  | 7       |
| CTBP1       | 6.75E-12 | 0.381322042 | 0.362 | 0.096 | 1.06E-07  | 7       |
| MRPL37      | 8.45E-12 | 0.256987448 | 0.29  | 0.066 | 1.33E-07  | 7       |
| CD79B       | 8.49E-12 | 0.803707812 | 0.667 | 0.31  | 1.33E-07  | 7       |
| HSBP1       | 9.59E-12 | 0.399347775 | 0.493 | 0.152 | 1.50E-07  | 7       |
| CD79A       | 1.05E-11 | 0.816270422 | 0.609 | 0.267 | 1.64E-07  | 7       |
| HAUS1       | 1.18E-11 | 0.289587987 | 0.304 | 0.072 | 1.84E-07  | 7       |
| MDH1        | 1.18E-11 | 0.4848274   | 0.551 | 0.19  | 1.85E-07  | 7       |
| AP3B1       | 1.37E-11 | 0.489824403 | 0.406 | 0.122 | 2.14E-07  | 7       |
| GGCT        | 1.48E-11 | 0.364550286 | 0.275 | 0.063 | 2.31E-07  | 7       |
| MPDU1       | 1.48E-11 | 0.301304717 | 0.333 | 0.084 | 2.31E-07  | 7       |
| LUC7L2      | 1.64E-11 | 0.400490869 | 0.42  | 0.122 | 2.57E-07  | 7       |
| PRDX3       | 1.88E-11 | 0.444983153 | 0.435 | 0.134 | 2.95E-07  | 7       |
| LMO4        | 1.92E-11 | 0.331749811 | 0.42  | 0.121 | 3.01E-07  | 7       |
| SET         | 2.27E-11 | 0.734089086 | 0.768 | 0.373 | 3.56E-07  | 7       |
| BAZ1B       | 2.47E-11 | 0.390270988 | 0.348 | 0.093 | 3.87E-07  | 7       |
| LGALS3BP    | 3.19E-11 | 0.3602246   | 0.304 | 0.076 | 5.00E-07  | 7       |

Table S2 Continued

| Gene_marker   | P_val    | Avg_logFC   | Pct.1 | Pct.2 | P_val_adj | Cluster |
|---------------|----------|-------------|-------|-------|-----------|---------|
| EGR1          | 3.54E-11 | 0.533288008 | 0.536 | 0.198 | 5.56E-07  | 7       |
| ALOX5         | 3.98E-11 | 0.448632934 | 0.29  | 0.073 | 6.24E-07  | 7       |
| RNGTT         | 4.39E-11 | 0.460468939 | 0.304 | 0.077 | 6.89E-07  | 7       |
| RBX1          | 5.57E-11 | 0.514109239 | 0.768 | 0.341 | 8.72E-07  | 7       |
| RUVBL2        | 5.80E-11 | 0.271200127 | 0.261 | 0.059 | 9.09E-07  | 7       |
| VDAC3         | 5.99E-11 | 0.453990093 | 0.536 | 0.187 | 9.39E-07  | 7       |
| LY86          | 6.98E-11 | 0.435916536 | 0.348 | 0.097 | 1.09E-06  | 7       |
| NSL1          | 7.51E-11 | 0.340363171 | 0.377 | 0.107 | 1.18E-06  | 7       |
| HLA-DMA       | 7.94E-11 | 0.454660346 | 0.71  | 0.296 | 1.25E-06  | 7       |
| MT-CO3        | 8.42E-11 | 0.387814293 | 1     | 0.994 | 1.32E-06  | 7       |
| CPSF6         | 8.89E-11 | 0.329502875 | 0.319 | 0.084 | 1.39E-06  | 7       |
| GUSB          | 9.27E-11 | 0.378489546 | 0.319 | 0.085 | 1.45E-06  | 7       |
| CH17-373J23.1 | 1.32E-10 | 0.694891122 | 0.565 | 0.246 | 2.07E-06  | 7       |
| SMC1A         | 1.32E-10 | 0.337613628 | 0.261 | 0.061 | 2.07E-06  | 7       |
| LSM3          | 1.95E-10 | 0.487299025 | 0.667 | 0.272 | 3.06E-06  | 7       |
| MZT1          | 2.06E-10 | 0.37355015  | 0.406 | 0.123 | 3.23E-06  | 7       |
| NUDT5         | 2.11E-10 | 0.29235217  | 0.42  | 0.125 | 3.31E-06  | 7       |
| QRSL1         | 2.35E-10 | 0.355327428 | 0.333 | 0.092 | 3.69E-06  | 7       |
| CD19          | 3.39E-10 | 0.373585508 | 0.377 | 0.115 | 5.32E-06  | 7       |
| IGLC3         | 3.53E-10 | 0.668078306 | 0.783 | 0.487 | 5.53E-06  | 7       |
| SRSF10        | 3.90E-10 | 0.533017948 | 0.58  | 0.24  | 6.11E-06  | 7       |
| UBE2E3        | 4.03E-10 | 0.426377386 | 0.435 | 0.142 | 6.32E-06  | 7       |
| NAP1L1        | 4.13E-10 | 0.494014083 | 0.884 | 0.575 | 6.47E-06  | 7       |
| ITGAE         | 5.02E-10 | 0.367799504 | 0.377 | 0.115 | 7.87E-06  | 7       |
| EAPP          | 5.10E-10 | 0.404896093 | 0.522 | 0.189 | 7.99E-06  | 7       |
| LSM2          | 5.23E-10 | 0.359722102 | 0.536 | 0.19  | 8.20E-06  | 7       |
| EWSR1         | 5.62E-10 | 0.426566178 | 0.638 | 0.261 | 8.81E-06  | 7       |
| CAPRIN1       | 5.63E-10 | 0.285523762 | 0.348 | 0.098 | 8.82E-06  | 7       |
| CCT2          | 8.28E-10 | 0.331989248 | 0.435 | 0.139 | 1.30E-05  | 7       |
| PHACTR1       | 9.00E-10 | 0.427742264 | 0.275 | 0.073 | 1.41E-05  | 7       |



Table S2 Continued

| Gene_marker | P_val    | Avg_logFC   | Pct.1 | Pct.2 | P_val_adj | Cluster |
|-------------|----------|-------------|-------|-------|-----------|---------|
| IGHM        | 1.05E-09 | 0.279378157 | 0.797 | 0.451 | 1.65E-05  | 7       |
| TACC1       | 1.09E-09 | 0.291259684 | 0.362 | 0.106 | 1.70E-05  | 7       |
| ITM2C       | 1.12E-09 | 0.437668318 | 0.478 | 0.173 | 1.76E-05  | 7       |
| KHDRBS1     | 1.21E-09 | 0.465594335 | 0.667 | 0.287 | 1.89E-05  | 7       |
| HNRNPA1     | 1.26E-09 | 0.371964168 | 0.971 | 0.91  | 1.97E-05  | 7       |
| EBNA1BP2    | 1.31E-09 | 0.293377941 | 0.275 | 0.071 | 2.06E-05  | 7       |
| CHI3L2      | 1.32E-09 | 0.35591517  | 0.406 | 0.129 | 2.07E-05  | 7       |
| CLNS1A      | 1.45E-09 | 0.344626962 | 0.58  | 0.214 | 2.27E-05  | 7       |
| PDZD11      | 1.49E-09 | 0.315101025 | 0.275 | 0.072 | 2.33E-05  | 7       |
| MAD2L2      | 1.57E-09 | 0.302414876 | 0.333 | 0.095 | 2.45E-05  | 7       |
| TMEM107     | 1.89E-09 | 0.459133115 | 0.536 | 0.207 | 2.96E-05  | 7       |
| SNRPD1      | 2.11E-09 | 0.471687728 | 0.652 | 0.287 | 3.30E-05  | 7       |
| UBE2E1      | 2.11E-09 | 0.325871352 | 0.362 | 0.111 | 3.31E-05  | 7       |
| SNRPF       | 2.13E-09 | 0.429581453 | 0.739 | 0.319 | 3.33E-05  | 7       |
| SLC25A5     | 2.20E-09 | 0.544830983 | 0.696 | 0.337 | 3.44E-05  | 7       |
| SUMO2       | 2.23E-09 | 0.430121774 | 0.913 | 0.7   | 3.49E-05  | 7       |
| SLBP        | 2.29E-09 | 0.463816851 | 0.435 | 0.154 | 3.58E-05  | 7       |
| HNRNPR      | 2.34E-09 | 0.455527536 | 0.681 | 0.281 | 3.67E-05  | 7       |
| PMAIP1      | 2.35E-09 | 0.394852672 | 0.391 | 0.125 | 3.68E-05  | 7       |
| IGHD        | 2.72E-09 | 0.376283578 | 0.333 | 0.102 | 4.27E-05  | 7       |
| PPIL3       | 2.77E-09 | 0.39686032  | 0.348 | 0.107 | 4.34E-05  | 7       |
| LTA4H       | 2.78E-09 | 0.317617703 | 0.377 | 0.119 | 4.35E-05  | 7       |
| PAFAH1B3    | 2.81E-09 | 0.308747588 | 0.304 | 0.085 | 4.41E-05  | 7       |
| SFPQ        | 2.84E-09 | 0.533010868 | 0.609 | 0.261 | 4.45E-05  | 7       |
| PSMA4       | 3.03E-09 | 0.60092662  | 0.783 | 0.435 | 4.74E-05  | 7       |
| RNASE6      | 4.60E-09 | 0.333377862 | 0.261 | 0.069 | 7.21E-05  | 7       |
| HIF1A       | 4.63E-09 | 0.338039505 | 0.333 | 0.101 | 7.26E-05  | 7       |
| CD9         | 4.69E-09 | 0.417237825 | 0.333 | 0.105 | 7.36E-05  | 7       |
| ATP5C1      | 4.87E-09 | 0.413297401 | 0.667 | 0.298 | 7.63E-05  | 7       |
| IDH2        | 6.19E-09 | 0.529367394 | 0.667 | 0.33  | 9.70E-05  | 7       |

Table S2 Continued

| Gene_marker | P_val    | Avg_logFC   | Pct.1 | Pct.2 | P_val_adj   | Cluster |
|-------------|----------|-------------|-------|-------|-------------|---------|
| SNRPE       | 6.37E-09 | 0.443621435 | 0.681 | 0.302 | 9.99E-05    | 7       |
| PLGRKT      | 6.64E-09 | 0.272380536 | 0.348 | 0.106 | 0.000104057 | 7       |
| GRN         | 6.81E-09 | 0.535520559 | 0.362 | 0.129 | 0.000106737 | 7       |
| TIMMDC1     | 7.17E-09 | 0.290563137 | 0.319 | 0.094 | 0.000112324 | 7       |
| NONO        | 7.30E-09 | 0.400955446 | 0.536 | 0.209 | 0.00011442  | 7       |
| PSMB6       | 7.46E-09 | 0.384684935 | 0.681 | 0.288 | 0.000116866 | 7       |
| IMPDH2      | 8.02E-09 | 0.261792309 | 0.29  | 0.08  | 0.000125696 | 7       |
| HMGA1       | 8.08E-09 | 0.390578958 | 0.42  | 0.148 | 0.000126702 | 7       |
| CLTA        | 8.80E-09 | 0.279720881 | 0.464 | 0.156 | 0.000137894 | 7       |
| MRPL13      | 9.03E-09 | 0.312792465 | 0.304 | 0.09  | 0.000141614 | 7       |
| HADHB       | 9.68E-09 | 0.2671593   | 0.362 | 0.113 | 0.000151693 | 7       |
| RALGPS2     | 9.85E-09 | 0.544963027 | 0.29  | 0.087 | 0.000154389 | 7       |
| COX5A       | 1.03E-08 | 0.408230836 | 0.696 | 0.33  | 0.00016109  | 7       |
| LYN         | 1.05E-08 | 0.399079967 | 0.275 | 0.079 | 0.000165363 | 7       |
| NME1        | 1.06E-08 | 0.273565429 | 0.333 | 0.102 | 0.000165721 | 7       |
| FAM96A      | 1.08E-08 | 0.309192969 | 0.42  | 0.142 | 0.000169422 | 7       |
| HSP90AA1    | 1.09E-08 | 0.555445462 | 0.855 | 0.61  | 0.000171374 | 7       |
| HPRT1       | 1.11E-08 | 0.304803999 | 0.362 | 0.115 | 0.000173562 | 7       |
| RBM42       | 1.12E-08 | 0.290442406 | 0.348 | 0.108 | 0.000175899 | 7       |
| TNFRSF13C   | 1.16E-08 | 0.46380158  | 0.377 | 0.13  | 0.000181361 | 7       |
| SKA2        | 1.27E-08 | 0.353296402 | 0.348 | 0.109 | 0.000198683 | 7       |
| HDAC2       | 1.58E-08 | 0.457888425 | 0.391 | 0.14  | 0.000247887 | 7       |
| IMMP1L      | 1.61E-08 | 0.266258435 | 0.29  | 0.083 | 0.000252005 | 7       |
| NDUFAB1     | 1.71E-08 | 0.39972064  | 0.478 | 0.184 | 0.000267332 | 7       |
| DNAJA1      | 1.71E-08 | 0.35001283  | 0.565 | 0.222 | 0.000268188 | 7       |
| MTCH2       | 1.75E-08 | 0.255402634 | 0.29  | 0.082 | 0.00027383  | 7       |
| HLA-DQA1    | 1.78E-08 | 0.366395083 | 0.681 | 0.289 | 0.000278879 | 7       |
| METTL9      | 1.97E-08 | 0.423394525 | 0.58  | 0.235 | 0.000308709 | 7       |
| VDAC1       | 2.09E-08 | 0.335900467 | 0.522 | 0.199 | 0.000328303 | 7       |
| MPLKIP      | 2.24E-08 | 0.279526899 | 0.348 | 0.11  | 0.000350862 | 7       |

Table S2 Continued

| Gene_marker | P_val    | Avg_logFC   | Pct.1 | Pct.2 | P_val_adj   | Cluster |
|-------------|----------|-------------|-------|-------|-------------|---------|
| PSMD14      | 2.35E-08 | 0.303010441 | 0.333 | 0.104 | 0.00036839  | 7       |
| ATP6V1D     | 2.46E-08 | 0.272462645 | 0.319 | 0.097 | 0.000385769 | 7       |
| YWHAE       | 2.83E-08 | 0.472748828 | 0.507 | 0.213 | 0.000443964 | 7       |
| TPM4        | 2.94E-08 | 0.541634727 | 0.435 | 0.166 | 0.000460457 | 7       |
| RBBP7       | 3.15E-08 | 0.351463762 | 0.406 | 0.143 | 0.000494362 | 7       |
| SRSF3       | 3.42E-08 | 0.483144499 | 0.884 | 0.535 | 0.000536175 | 7       |
| RBBP4       | 3.42E-08 | 0.394696297 | 0.623 | 0.265 | 0.000536787 | 7       |
| APLP2       | 3.52E-08 | 0.423727208 | 0.29  | 0.09  | 0.0005524   | 7       |
| FDPS        | 3.64E-08 | 0.27470876  | 0.478 | 0.173 | 0.00057004  | 7       |
| PTCH2       | 3.79E-08 | 0.45338405  | 0.29  | 0.09  | 0.000594279 | 7       |
| GNAI3       | 3.91E-08 | 0.272260005 | 0.406 | 0.14  | 0.000612174 | 7       |
| DYNLL1      | 3.96E-08 | 0.487394274 | 0.739 | 0.433 | 0.000621096 | 7       |
| CACYBP      | 4.08E-08 | 0.393907683 | 0.464 | 0.178 | 0.000639536 | 7       |
| HLA-DMB     | 4.19E-08 | 0.340925612 | 0.449 | 0.168 | 0.000657321 | 7       |
| PARP15      | 4.64E-08 | 0.306849055 | 0.261 | 0.074 | 0.000727603 | 7       |
| LGALS9      | 4.89E-08 | 0.326042422 | 0.362 | 0.124 | 0.00076588  | 7       |
| ILF3        | 4.91E-08 | 0.35336583  | 0.478 | 0.183 | 0.000769104 | 7       |
| DDX39A      | 5.10E-08 | 0.357648748 | 0.42  | 0.153 | 0.000800126 | 7       |
| HSPB11      | 5.49E-08 | 0.334819871 | 0.58  | 0.241 | 0.000860048 | 7       |
| MIS18BP1    | 5.54E-08 | 0.366147721 | 0.319 | 0.104 | 0.000868192 | 7       |
| CD72        | 6.62E-08 | 0.401131928 | 0.275 | 0.085 | 0.001037142 | 7       |
| RAD21       | 7.62E-08 | 0.565586975 | 0.449 | 0.187 | 0.001194232 | 7       |
| FOS         | 7.68E-08 | 0.736622697 | 0.768 | 0.472 | 0.001204124 | 7       |
| BTF3L4      | 8.60E-08 | 0.253250444 | 0.377 | 0.129 | 0.001347434 | 7       |
| DRAM2       | 8.70E-08 | 0.334878653 | 0.478 | 0.185 | 0.001364165 | 7       |
| RFC1        | 9.54E-08 | 0.272645386 | 0.333 | 0.108 | 0.001495935 | 7       |
| TMEM126A    | 1.03E-07 | 0.295362855 | 0.333 | 0.11  | 0.001613874 | 7       |
| BCL7B       | 1.06E-07 | 0.251734381 | 0.377 | 0.127 | 0.001667135 | 7       |
| MMADHC      | 1.07E-07 | 0.299228385 | 0.522 | 0.203 | 0.001679937 | 7       |
| SPIB        | 1.12E-07 | 0.270746748 | 0.261 | 0.077 | 0.001750626 | 7       |

Table S2 Continued

| Gene_marker | P_val    | Avg_logFC   | Pct.1 | Pct.2 | P_val_adj   | Cluster |
|-------------|----------|-------------|-------|-------|-------------|---------|
| TXNDC12     | 1.15E-07 | 0.330413238 | 0.435 | 0.163 | 0.001799652 | 7       |
| MTF2        | 1.24E-07 | 0.334849751 | 0.377 | 0.134 | 0.001939293 | 7       |
| XRCC5       | 1.34E-07 | 0.397055268 | 0.594 | 0.262 | 0.002100816 | 7       |
| UQCRQ       | 1.39E-07 | 0.400264855 | 0.826 | 0.444 | 0.002179395 | 7       |
| NDUFB5      | 1.39E-07 | 0.297527195 | 0.565 | 0.232 | 0.002183348 | 7       |
| VIM         | 1.46E-07 | 0.652968527 | 0.812 | 0.564 | 0.002283269 | 7       |
| C14orf166   | 1.51E-07 | 0.484905964 | 0.681 | 0.352 | 0.002365068 | 7       |
| CD69        | 1.54E-07 | 0.497351735 | 0.884 | 0.602 | 0.002417141 | 7       |
| BABAM1      | 1.72E-07 | 0.30865408  | 0.406 | 0.149 | 0.002701    | 7       |
| CETN3       | 1.79E-07 | 0.292990039 | 0.29  | 0.091 | 0.002809052 | 7       |
| VPS29       | 1.82E-07 | 0.354419447 | 0.536 | 0.226 | 0.002850729 | 7       |
| ZCCHC10     | 1.82E-07 | 0.361174969 | 0.348 | 0.12  | 0.002854221 | 7       |
| ACTG1       | 1.85E-07 | 0.496028394 | 0.971 | 0.913 | 0.002903723 | 7       |
| PHF14       | 1.92E-07 | 0.352054316 | 0.478 | 0.189 | 0.003004871 | 7       |
| SRP9        | 1.93E-07 | 0.426555922 | 0.739 | 0.473 | 0.003030682 | 7       |
| PPIA        | 1.99E-07 | 0.466190625 | 0.913 | 0.782 | 0.003122553 | 7       |
| PRDX6       | 2.14E-07 | 0.318528543 | 0.551 | 0.231 | 0.003349933 | 7       |
| RNASEH2C    | 2.14E-07 | 0.296357793 | 0.522 | 0.211 | 0.003360888 | 7       |
| PRDX2       | 2.39E-07 | 0.382748274 | 0.71  | 0.354 | 0.003752864 | 7       |
| NMI         | 2.45E-07 | 0.279389118 | 0.304 | 0.099 | 0.00384441  | 7       |
| GNG11       | 2.70E-07 | 0.469516895 | 0.29  | 0.1   | 0.004224798 | 7       |
| METAP2      | 2.81E-07 | 0.39582139  | 0.449 | 0.182 | 0.004412357 | 7       |
| PDCD5       | 2.83E-07 | 0.273327643 | 0.464 | 0.179 | 0.004429983 | 7       |
| MT-CO2      | 3.00E-07 | 0.290975996 | 1     | 0.997 | 0.004697858 | 7       |
| AP1S1       | 3.05E-07 | 0.253151463 | 0.29  | 0.092 | 0.004775011 | 7       |
| PSMC3       | 3.13E-07 | 0.278139438 | 0.464 | 0.182 | 0.004899689 | 7       |
| CCT4        | 3.34E-07 | 0.311682867 | 0.536 | 0.222 | 0.005242862 | 7       |
| MED30       | 3.43E-07 | 0.267589482 | 0.348 | 0.12  | 0.005371519 | 7       |
| PNN         | 3.75E-07 | 0.487776689 | 0.681 | 0.326 | 0.005871312 | 7       |
| ANAPC11     | 3.92E-07 | 0.337329316 | 0.638 | 0.288 | 0.006149584 | 7       |

Table S2 Continued

| Gene_marker   | P_val    | Avg_logFC   | Pct.1 | Pct.2 | P_val_adj   | Cluster |
|---------------|----------|-------------|-------|-------|-------------|---------|
| USP22         | 4.07E-07 | 0.353446168 | 0.261 | 0.082 | 0.006379255 | 7       |
| PMF1          | 4.69E-07 | 0.261099099 | 0.348 | 0.123 | 0.007348743 | 7       |
| SPINT2        | 5.05E-07 | 0.31162442  | 0.275 | 0.09  | 0.007915062 | 7       |
| TMEM109       | 5.35E-07 | 0.272787545 | 0.42  | 0.159 | 0.008386941 | 7       |
| FAM111A       | 5.40E-07 | 0.270375255 | 0.275 | 0.087 | 0.00846981  | 7       |
| TUBA1A        | 5.82E-07 | 0.536773737 | 0.638 | 0.323 | 0.009126802 | 7       |
| HNRNPF        | 6.32E-07 | 0.466355905 | 0.783 | 0.469 | 0.009900876 | 7       |
| PPIH          | 6.59E-07 | 0.251710991 | 0.261 | 0.081 | 0.010327436 | 7       |
| NFKBIZ        | 7.02E-07 | 0.29285361  | 0.275 | 0.091 | 0.01099859  | 7       |
| VMP1          | 7.13E-07 | 0.295150488 | 0.493 | 0.199 | 0.011170288 | 7       |
| MT-ND4        | 7.91E-07 | 0.335452182 | 0.986 | 0.986 | 0.012395405 | 7       |
| PARP1         | 8.26E-07 | 0.341073658 | 0.536 | 0.236 | 0.012955249 | 7       |
| TCP1          | 8.85E-07 | 0.274122308 | 0.406 | 0.156 | 0.013866483 | 7       |
| ZSCAN16-AS1   | 9.38E-07 | 0.268319717 | 0.362 | 0.135 | 0.014707248 | 7       |
| MAGOH         | 9.46E-07 | 0.273041801 | 0.536 | 0.223 | 0.014825453 | 7       |
| CALM3         | 9.74E-07 | 0.54443666  | 0.681 | 0.438 | 0.015269706 | 7       |
| TCF4          | 9.82E-07 | 0.265035331 | 0.261 | 0.085 | 0.015396697 | 7       |
| MRPL52        | 1.00E-06 | 0.360245463 | 0.536 | 0.242 | 0.015707671 | 7       |
| HNRNPA3       | 1.05E-06 | 0.442318548 | 0.739 | 0.415 | 0.016388471 | 7       |
| SRSF2         | 1.05E-06 | 0.461751471 | 0.783 | 0.472 | 0.016469072 | 7       |
| STRA13        | 1.15E-06 | 0.39131581  | 0.377 | 0.145 | 0.01804004  | 7       |
| DNAJB11       | 1.19E-06 | 0.287979051 | 0.304 | 0.107 | 0.018638707 | 7       |
| PMVK          | 1.19E-06 | 0.298394362 | 0.275 | 0.092 | 0.018699046 | 7       |
| IGLC2         | 1.24E-06 | 0.632427227 | 1     | 0.946 | 0.0195094   | 7       |
| SF3B2         | 1.27E-06 | 0.306151046 | 0.623 | 0.297 | 0.019981253 | 7       |
| RP5-1171I10.5 | 1.28E-06 | 0.434824248 | 0.623 | 0.3   | 0.020006228 | 7       |
| CHMP5         | 1.34E-06 | 0.311473092 | 0.449 | 0.181 | 0.020938622 | 7       |
| RPLP0         | 1.34E-06 | 0.275621897 | 1     | 0.967 | 0.021003869 | 7       |
| ADI1          | 1.37E-06 | 0.296772606 | 0.319 | 0.115 | 0.021486032 | 7       |
| NAE1          | 1.40E-06 | 0.278350377 | 0.319 | 0.113 | 0.021941591 | 7       |

Table S2 Continued

| Gene_marker | P_val    | Avg_logFC   | Pct.1 | Pct.2 | P_val_adj   | Cluster |
|-------------|----------|-------------|-------|-------|-------------|---------|
| PPP1CB      | 1.42E-06 | 0.313304924 | 0.58  | 0.265 | 0.022287684 | 7       |
| COX8A       | 1.52E-06 | 0.460077464 | 0.754 | 0.488 | 0.023858714 | 7       |
| CNTRL       | 1.52E-06 | 0.402788047 | 0.319 | 0.115 | 0.023901783 | 7       |
| PSAP        | 1.63E-06 | 0.475256603 | 0.725 | 0.403 | 0.025492903 | 7       |
| UBE2I       | 1.64E-06 | 0.379219288 | 0.696 | 0.348 | 0.025736993 | 7       |
| PSMA1       | 1.65E-06 | 0.32374472  | 0.667 | 0.323 | 0.025942407 | 7       |
| UPF3B       | 1.72E-06 | 0.25801893  | 0.275 | 0.092 | 0.027021618 | 7       |
| SF3A3       | 1.73E-06 | 0.298007233 | 0.275 | 0.094 | 0.027133839 | 7       |
| CALM2       | 1.80E-06 | 0.443965276 | 0.87  | 0.714 | 0.028191671 | 7       |
| CCDC167     | 1.85E-06 | 0.369398677 | 0.377 | 0.153 | 0.028973861 | 7       |
| RBM8A       | 1.94E-06 | 0.312454461 | 0.696 | 0.347 | 0.03046036  | 7       |
| DECR1       | 2.03E-06 | 0.322055158 | 0.406 | 0.166 | 0.03180033  | 7       |
| SDCBP       | 2.13E-06 | 0.260120027 | 0.406 | 0.16  | 0.033368858 | 7       |
| BTG2        | 2.14E-06 | 0.592411483 | 0.565 | 0.312 | 0.033526951 | 7       |
| USP1        | 2.14E-06 | 0.287098975 | 0.275 | 0.095 | 0.033594661 | 7       |
| BLOC1S1     | 2.20E-06 | 0.352503597 | 0.739 | 0.401 | 0.034434496 | 7       |
| PSMB7       | 2.20E-06 | 0.264052928 | 0.565 | 0.244 | 0.034474519 | 7       |
| HMG20B      | 2.24E-06 | 0.321191869 | 0.29  | 0.102 | 0.035191848 | 7       |
| MZT2B       | 2.46E-06 | 0.355841313 | 0.754 | 0.39  | 0.038619036 | 7       |
| UBL7        | 2.47E-06 | 0.250570795 | 0.304 | 0.108 | 0.038791541 | 7       |
| NSA2        | 2.56E-06 | 0.359874048 | 0.536 | 0.246 | 0.040078182 | 7       |
| LSM4        | 2.62E-06 | 0.316997402 | 0.449 | 0.192 | 0.041024777 | 7       |
| HNRNPH1     | 2.73E-06 | 0.468582629 | 0.71  | 0.376 | 0.042808188 | 7       |
| DNPH1       | 2.74E-06 | 0.250060033 | 0.333 | 0.124 | 0.043022974 | 7       |
| ATOX1       | 3.14E-06 | 0.271887185 | 0.348 | 0.135 | 0.049261558 | 7       |
| NUDC        | 3.27E-06 | 0.315200787 | 0.478 | 0.212 | 0.051203231 | 7       |
| SNRPB       | 3.27E-06 | 0.375084998 | 0.696 | 0.371 | 0.051267379 | 7       |
| EIF1AX      | 3.37E-06 | 0.298494894 | 0.449 | 0.191 | 0.052816136 | 7       |
| ATP5G3      | 3.39E-06 | 0.364219874 | 0.739 | 0.433 | 0.053187405 | 7       |
| ANP32A      | 3.53E-06 | 0.335668961 | 0.536 | 0.249 | 0.05526164  | 7       |

Table S2 Continued

| Gene_marker | P_val    | Avg_logFC   | Pct.1 | Pct.2 | P_val_adj   | Cluster |
|-------------|----------|-------------|-------|-------|-------------|---------|
| UCP2        | 3.64E-06 | 0.346869587 | 0.87  | 0.528 | 0.056988514 | 7       |
| NAA38       | 4.06E-06 | 0.339964212 | 0.667 | 0.319 | 0.063601287 | 7       |
| HNRNPA0     | 4.14E-06 | 0.415754911 | 0.841 | 0.528 | 0.064826823 | 7       |
| DDAH2       | 4.19E-06 | 0.273538022 | 0.275 | 0.096 | 0.065736989 | 7       |
| MRPL51      | 4.58E-06 | 0.35439017  | 0.536 | 0.263 | 0.071859963 | 7       |
| GNAI2       | 5.08E-06 | 0.345315017 | 0.391 | 0.168 | 0.079655798 | 7       |
| HNRNPUL1    | 5.39E-06 | 0.283383194 | 0.464 | 0.197 | 0.084425243 | 7       |
| YBX1        | 5.40E-06 | 0.33355616  | 0.957 | 0.805 | 0.084653462 | 7       |
| PPP4C       | 5.43E-06 | 0.372910129 | 0.58  | 0.307 | 0.085047972 | 7       |
| SHFM1       | 5.98E-06 | 0.344082267 | 0.696 | 0.361 | 0.093819132 | 7       |
| ANKRD10     | 6.13E-06 | 0.297251749 | 0.391 | 0.164 | 0.096111924 | 7       |
| SSRP1       | 6.32E-06 | 0.309432864 | 0.333 | 0.13  | 0.099003128 | 7       |
| RBM23       | 6.71E-06 | 0.310502691 | 0.42  | 0.174 | 0.105111096 | 7       |
| TMEM243     | 6.95E-06 | 0.252450528 | 0.507 | 0.228 | 0.108952701 | 7       |
| UQCRC1      | 7.16E-06 | 0.317012724 | 0.377 | 0.156 | 0.112296953 | 7       |
| KTN1        | 7.22E-06 | 0.305410627 | 0.638 | 0.319 | 0.113166807 | 7       |
| HNRNPC      | 7.43E-06 | 0.368046022 | 0.812 | 0.536 | 0.116432799 | 7       |
| DNAJC15     | 7.82E-06 | 0.288786011 | 0.464 | 0.204 | 0.122655976 | 7       |
| APH1A       | 7.85E-06 | 0.251360941 | 0.478 | 0.208 | 0.12303607  | 7       |
| SNRPG       | 7.97E-06 | 0.399103905 | 0.725 | 0.422 | 0.124874483 | 7       |
| MPC2        | 8.12E-06 | 0.308187348 | 0.377 | 0.159 | 0.127361623 | 7       |
| EIF4H       | 8.32E-06 | 0.28272294  | 0.464 | 0.201 | 0.130495721 | 7       |
| NDUFB6      | 9.01E-06 | 0.264337934 | 0.406 | 0.169 | 0.1412795   | 7       |
| NUDT21      | 1.03E-05 | 0.255634132 | 0.319 | 0.123 | 0.161565378 | 7       |
| HDAC1       | 1.08E-05 | 0.335086774 | 0.464 | 0.211 | 0.16903506  | 7       |
| RHOB        | 1.14E-05 | 0.395518104 | 0.29  | 0.115 | 0.178148512 | 7       |
| EIF5B       | 1.14E-05 | 0.279695629 | 0.638 | 0.311 | 0.17855746  | 7       |
| HNRNPD      | 1.20E-05 | 0.369809379 | 0.42  | 0.193 | 0.188609794 | 7       |
| AP2S1       | 1.33E-05 | 0.261435581 | 0.594 | 0.277 | 0.208810476 | 7       |
| PSMB2       | 1.58E-05 | 0.308006688 | 0.536 | 0.266 | 0.24837671  | 7       |

Table S2 Continued

| Gene_marker   | P_val    | Avg_logFC   | Pct.1 | Pct.2 | P_val_adj   | Cluster |
|---------------|----------|-------------|-------|-------|-------------|---------|
| TXNDC17       | 1.60E-05 | 0.265972195 | 0.333 | 0.135 | 0.250725533 | 7       |
| APEX1         | 1.62E-05 | 0.259133849 | 0.406 | 0.177 | 0.253612359 | 7       |
| GSTO1         | 1.64E-05 | 0.274338555 | 0.42  | 0.185 | 0.256446    | 7       |
| DNAJC8        | 1.81E-05 | 0.349492559 | 0.565 | 0.29  | 0.28333065  | 7       |
| ODC1          | 1.81E-05 | 0.250439715 | 0.319 | 0.126 | 0.283720494 | 7       |
| UBE2N         | 1.88E-05 | 0.346247688 | 0.594 | 0.299 | 0.294022878 | 7       |
| MT-ND1        | 1.92E-05 | 0.299832206 | 0.957 | 0.794 | 0.30170201  | 7       |
| XRCC6         | 1.93E-05 | 0.351305753 | 0.536 | 0.261 | 0.30283261  | 7       |
| HNRNPM        | 1.94E-05 | 0.40395902  | 0.696 | 0.398 | 0.303656028 | 7       |
| BANF1         | 1.96E-05 | 0.293425871 | 0.522 | 0.254 | 0.307149737 | 7       |
| NDUFA2        | 2.18E-05 | 0.307306958 | 0.58  | 0.313 | 0.341380372 | 7       |
| RBM17         | 2.29E-05 | 0.360560786 | 0.406 | 0.187 | 0.359445027 | 7       |
| CHD9          | 2.88E-05 | 0.28064463  | 0.362 | 0.156 | 0.451535766 | 7       |
| TRA2B         | 3.01E-05 | 0.328240008 | 0.725 | 0.407 | 0.471124418 | 7       |
| SMS           | 3.35E-05 | 0.262788246 | 0.42  | 0.19  | 0.524820006 | 7       |
| MORF4L1       | 3.60E-05 | 0.293934019 | 0.841 | 0.534 | 0.563850342 | 7       |
| PSMA2         | 3.78E-05 | 0.441032862 | 0.638 | 0.37  | 0.592977218 | 7       |
| UQCRH         | 3.82E-05 | 0.32431114  | 0.841 | 0.524 | 0.598609144 | 7       |
| HADHA         | 3.98E-05 | 0.255173982 | 0.478 | 0.225 | 0.623992897 | 7       |
| ENY2          | 4.01E-05 | 0.318802672 | 0.493 | 0.245 | 0.62890234  | 7       |
| PABPN1        | 4.45E-05 | 0.346340009 | 0.333 | 0.147 | 0.698005904 | 7       |
| SLC25A3       | 4.58E-05 | 0.365636669 | 0.652 | 0.372 | 0.717637213 | 7       |
| HN1           | 4.67E-05 | 0.348705777 | 0.493 | 0.252 | 0.732753384 | 7       |
| ZFP36L1       | 4.97E-05 | 0.546820586 | 0.652 | 0.422 | 0.778397657 | 7       |
| POLR2K        | 5.00E-05 | 0.29346934  | 0.551 | 0.275 | 0.784032017 | 7       |
| CFL1          | 5.07E-05 | 0.333318438 | 0.986 | 0.961 | 0.794099261 | 7       |
| ATP5F1        | 5.21E-05 | 0.290689385 | 0.623 | 0.335 | 0.817387052 | 7       |
| RP11-386I14.4 | 5.47E-05 | 0.50652331  | 0.551 | 0.333 | 0.857209359 | 7       |
| LBR           | 5.68E-05 | 0.363652199 | 0.449 | 0.223 | 0.890927681 | 7       |
| DBI           | 5.86E-05 | 0.35624066  | 0.768 | 0.474 | 0.918861474 | 7       |



Table S2 Continued

| Gene_marker | P_val       | Avg_logFC   | Pct.1 | Pct.2 | P_val_adj   | Cluster |
|-------------|-------------|-------------|-------|-------|-------------|---------|
| EIF5        | 5.89E-05    | 0.251914211 | 0.449 | 0.21  | 0.922594751 | 7       |
| DCK         | 5.95E-05    | 0.275504017 | 0.565 | 0.29  | 0.93307198  | 7       |
| POMP        | 6.28E-05    | 0.360741675 | 0.754 | 0.444 | 0.985000532 | 7       |
| CYB561A3    | 6.38E-05    | 0.303797738 | 0.304 | 0.13  | 0.999848679 | 7       |
| RCSD1       | 6.89E-05    | 0.282631952 | 0.551 | 0.284 | 1           | 7       |
| CAPZA2      | 7.83E-05    | 0.264952889 | 0.536 | 0.262 | 1           | 7       |
| COX17       | 7.83E-05    | 0.280820232 | 0.594 | 0.316 | 1           | 7       |
| NDUFA12     | 8.26E-05    | 0.274408063 | 0.507 | 0.255 | 1           | 7       |
| RHOA        | 8.40E-05    | 0.314551776 | 0.812 | 0.539 | 1           | 7       |
| CDK5RAP3    | 8.72E-05    | 0.268433285 | 0.391 | 0.179 | 1           | 7       |
| ROMO1       | 8.97E-05    | 0.309039196 | 0.623 | 0.342 | 1           | 7       |
| NFATC2IP    | 9.04E-05    | 0.324652824 | 0.275 | 0.113 | 1           | 7       |
| CALR        | 9.17E-05    | 0.439133182 | 0.71  | 0.449 | 1           | 7       |
| PSMA3       | 9.53E-05    | 0.257282232 | 0.377 | 0.176 | 1           | 7       |
| PSIP1       | 9.79E-05    | 0.275491934 | 0.565 | 0.292 | 1           | 7       |
| DCTN3       | 0.000102792 | 0.297806975 | 0.464 | 0.225 | 1           | 7       |
| TMX1        | 0.000104584 | 0.294095276 | 0.464 | 0.224 | 1           | 7       |
| IER2        | 0.000104985 | 0.590995203 | 0.754 | 0.574 | 1           | 7       |
| ATP5B       | 0.000106321 | 0.266071889 | 0.638 | 0.355 | 1           | 7       |
| IFI16       | 0.000112358 | 0.267277954 | 0.638 | 0.359 | 1           | 7       |
| WDR74       | 0.000119948 | 0.266246512 | 0.377 | 0.176 | 1           | 7       |
| GDI2        | 0.000133182 | 0.303008435 | 0.696 | 0.404 | 1           | 7       |
| COX6C       | 0.000138342 | 0.32692813  | 0.899 | 0.715 | 1           | 7       |
| BUB3        | 0.000151011 | 0.317840467 | 0.58  | 0.323 | 1           | 7       |
| EIF4E       | 0.000151641 | 0.276733422 | 0.348 | 0.16  | 1           | 7       |
| DDX46       | 0.000163867 | 0.255670361 | 0.507 | 0.253 | 1           | 7       |
| PARK7       | 0.00016686  | 0.317581166 | 0.739 | 0.469 | 1           | 7       |
| OCIAD2      | 0.000186929 | 0.251564636 | 0.609 | 0.326 | 1           | 7       |
| NDUFV2      | 0.000188135 | 0.291862711 | 0.478 | 0.251 | 1           | 7       |
| C12orf57    | 0.000201986 | 0.260497404 | 0.812 | 0.506 | 1           | 7       |

Table S2 Continued

| Gene_marker  | P_val       | Avg_logFC   | Pct.1 | Pct.2 | P_val_adj | Cluster |
|--------------|-------------|-------------|-------|-------|-----------|---------|
| EIF3L        | 0.000216185 | 0.307332885 | 0.841 | 0.553 | 1         | 7       |
| NDUFA4       | 0.000220464 | 0.257921767 | 0.928 | 0.684 | 1         | 7       |
| SLC38A2      | 0.000269172 | 0.274922086 | 0.507 | 0.261 | 1         | 7       |
| NPM1         | 0.000272205 | 0.25008318  | 0.928 | 0.783 | 1         | 7       |
| DUSP2        | 0.000340834 | 0.48481331  | 0.797 | 0.563 | 1         | 7       |
| NCL          | 0.000351312 | 0.312461283 | 0.681 | 0.397 | 1         | 7       |
| YWHAQ        | 0.00036325  | 0.273207632 | 0.768 | 0.477 | 1         | 7       |
| COX7B        | 0.000367226 | 0.251913765 | 0.754 | 0.442 | 1         | 7       |
| HLA-DRB1     | 0.0003953   | 0.257636891 | 0.928 | 0.654 | 1         | 7       |
| APOBEC3C     | 0.000428003 | 0.25910315  | 0.42  | 0.218 | 1         | 7       |
| ACTB         | 0.000455211 | 0.383984309 | 1     | 1     | 1         | 7       |
| PRDX1        | 0.000590008 | 0.299965852 | 0.565 | 0.328 | 1         | 7       |
| HMGN3        | 0.000620109 | 0.285532075 | 0.58  | 0.331 | 1         | 7       |
| RP11-160E2.6 | 0.000633455 | 0.394381313 | 0.449 | 0.246 | 1         | 7       |
| CHCHD2       | 0.000655064 | 0.323478157 | 0.855 | 0.696 | 1         | 7       |
| RTN4         | 0.000666408 | 0.288252342 | 0.507 | 0.29  | 1         | 7       |
| ARPC5        | 0.001046699 | 0.358182663 | 0.783 | 0.517 | 1         | 7       |
| ANXA2        | 0.001064642 | 0.367069367 | 0.478 | 0.274 | 1         | 7       |
| HNRNPK       | 0.001175312 | 0.253876715 | 0.87  | 0.646 | 1         | 7       |
| FOXP1        | 0.001178888 | 0.252805983 | 0.391 | 0.207 | 1         | 7       |
| ATP5J        | 0.001190537 | 0.257199131 | 0.725 | 0.454 | 1         | 7       |
| PLP2         | 0.001316349 | 0.259940952 | 0.42  | 0.232 | 1         | 7       |
| TPI1         | 0.001619564 | 0.306392307 | 0.71  | 0.475 | 1         | 7       |
| NDUFB3       | 0.001680835 | 0.306731248 | 0.435 | 0.257 | 1         | 7       |
| SEPT7        | 0.001708641 | 0.373152194 | 0.812 | 0.597 | 1         | 7       |
| LDHA         | 0.002226134 | 0.269127768 | 0.638 | 0.414 | 1         | 7       |
| UBXN4        | 0.002309522 | 0.261291264 | 0.507 | 0.28  | 1         | 7       |
| PSMB8        | 0.002989552 | 0.297154942 | 0.652 | 0.482 | 1         | 7       |
| JMJD1C       | 0.003777176 | 0.251472365 | 0.275 | 0.143 | 1         | 7       |
| POU2F2       | 0.003828913 | 0.322637478 | 0.275 | 0.147 | 1         | 7       |

Table S2 Continued

| Gene_marker | P_val       | Avg_logFC   | Pct.1 | Pct.2 | P_val_adj | Cluster |
|-------------|-------------|-------------|-------|-------|-----------|---------|
| COTL1       | 0.003996602 | 0.451528528 | 0.826 | 0.681 | 1         | 7       |
| H1FX        | 0.004528928 | 0.3006313   | 0.304 | 0.168 | 1         | 7       |
| SERBP1      | 0.004782458 | 0.270192442 | 0.594 | 0.39  | 1         | 7       |
| RPS26       | 0.00482023  | 0.253523402 | 0.884 | 0.744 | 1         | 7       |
| ARL6IP1     | 0.007074741 | 0.772260095 | 0.638 | 0.445 | 1         | 7       |
| MDM4        | 0.008503603 | 0.271422859 | 0.42  | 0.259 | 1         | 7       |
| PSMA7       | 0.00915575  | 0.320918203 | 0.812 | 0.64  | 1         | 7       |
| FCN1        | 0           | 2.860100925 | 0.98  | 0.01  | 0         | 8       |
| SERPINA1    | 0           | 2.671569858 | 1     | 0.007 | 0         | 8       |
| MS4A7       | 0           | 2.522592873 | 0.98  | 0.015 | 0         | 8       |
| CFD         | 0           | 2.339139765 | 0.94  | 0.01  | 0         | 8       |
| LINC01272   | 0           | 2.204156896 | 0.92  | 0.003 | 0         | 8       |
| CD68        | 0           | 2.164736139 | 0.96  | 0.014 | 0         | 8       |
| S100A9      | 0           | 2.160319107 | 0.9   | 0.015 | 0         | 8       |
| TMEM176B    | 0           | 1.665358491 | 0.88  | 0.002 | 0         | 8       |
| LILRB2      | 0           | 1.537165798 | 0.84  | 0.008 | 0         | 8       |
| VMO1        | 0           | 1.501564266 | 0.52  | 0.003 | 0         | 8       |
| LRRC25      | 0           | 1.49501645  | 0.76  | 0.002 | 0         | 8       |
| HCK         | 0           | 1.459964011 | 0.68  | 0.006 | 0         | 8       |
| PILRA       | 0           | 1.3853189   | 0.82  | 0.003 | 0         | 8       |
| CSF1R       | 0           | 1.366855929 | 0.74  | 0.003 | 0         | 8       |
| CLEC12A     | 0           | 1.344483471 | 0.68  | 0.004 | 0         | 8       |
| CLEC7A      | 0           | 1.313019878 | 0.72  | 0.001 | 0         | 8       |
| LILRA5      | 0           | 1.291385234 | 0.68  | 0.001 | 0         | 8       |
| LILRA1      | 0           | 1.204739295 | 0.6   | 0.001 | 0         | 8       |
| CPVL        | 0           | 1.17609639  | 0.68  | 0.002 | 0         | 8       |
| CD300E      | 0           | 1.126396129 | 0.54  | 0.001 | 0         | 8       |
| LILRB3      | 0           | 1.096368286 | 0.6   | 0.002 | 0         | 8       |
| CDKN1C      | 0           | 1.094244225 | 0.54  | 0.003 | 0         | 8       |
| C5AR1       | 0           | 1.067412458 | 0.52  | 0.001 | 0         | 8       |

Table S2 Continued

| Gene_marker   | P_val     | Avg_logFC   | Pct.1 | Pct.2 | P_val_adj | Cluster |
|---------------|-----------|-------------|-------|-------|-----------|---------|
| LILRA2        | 0         | 0.99304584  | 0.56  | 0.002 | 0         | 8       |
| MS4A4A        | 0         | 0.98525475  | 0.5   | 0.001 | 0         | 8       |
| APOBEC3A      | 0         | 0.944988123 | 0.46  | 0.001 | 0         | 8       |
| CSTA          | 0         | 0.939556137 | 0.44  | 0.001 | 0         | 8       |
| TMEM176A      | 0         | 0.918517506 | 0.52  | 0.002 | 0         | 8       |
| GPBAR1        | 0         | 0.857675288 | 0.56  | 0.001 | 0         | 8       |
| FPR1          | 0         | 0.834721331 | 0.4   | 0     | 0         | 8       |
| SLC31A2       | 2.41E-307 | 1.126455526 | 0.64  | 0.006 | 3.78E-303 | 8       |
| KLF4          | 1.92E-304 | 1.044444172 | 0.46  | 0.002 | 3.01E-300 | 8       |
| HK3           | 3.27E-297 | 0.792898866 | 0.38  | 0.001 | 5.13E-293 | 8       |
| CXCL16        | 3.79E-291 | 1.079526426 | 0.52  | 0.004 | 5.94E-287 | 8       |
| FGL2          | 1.72E-286 | 1.262466325 | 0.68  | 0.009 | 2.70E-282 | 8       |
| CST3          | 5.13E-269 | 3.094793865 | 1     | 0.03  | 8.05E-265 | 8       |
| TCF7L2        | 4.78E-268 | 1.220962789 | 0.72  | 0.012 | 7.49E-264 | 8       |
| IGSF6         | 6.64E-268 | 1.022729276 | 0.5   | 0.004 | 1.04E-263 | 8       |
| RP11-362F19.1 | 7.01E-263 | 0.708612463 | 0.34  | 0.001 | 1.10E-258 | 8       |
| SLC11A1       | 4.30E-260 | 1.089181269 | 0.66  | 0.01  | 6.75E-256 | 8       |
| NCF2          | 8.33E-257 | 1.175254129 | 0.62  | 0.008 | 1.31E-252 | 8       |
| CLEC4A        | 5.61E-255 | 0.669025104 | 0.4   | 0.002 | 8.79E-251 | 8       |
| PLAUR         | 1.63E-249 | 0.970776948 | 0.54  | 0.006 | 2.56E-245 | 8       |
| HES4          | 2.31E-237 | 0.705046219 | 0.34  | 0.001 | 3.63E-233 | 8       |
| HMOX1         | 3.04E-234 | 0.964224339 | 0.56  | 0.007 | 4.76E-230 | 8       |
| FAM26F        | 1.76E-233 | 2.013257254 | 0.98  | 0.034 | 2.75E-229 | 8       |
| CTSL          | 1.13E-221 | 0.903055305 | 0.4   | 0.003 | 1.77E-217 | 8       |
| SPI1          | 1.66E-219 | 2.080816672 | 0.94  | 0.033 | 2.60E-215 | 8       |
| MAFB          | 1.32E-214 | 0.927826608 | 0.4   | 0.003 | 2.07E-210 | 8       |
| LYZ           | 1.91E-212 | 1.243118387 | 0.62  | 0.012 | 2.99E-208 | 8       |
| RGS18         | 8.64E-212 | 0.607243309 | 0.28  | 0.001 | 1.35E-207 | 8       |
| CFP           | 1.61E-205 | 1.262863037 | 0.66  | 0.014 | 2.53E-201 | 8       |
| SECTM1        | 3.88E-199 | 0.621855764 | 0.34  | 0.002 | 6.08E-195 | 8       |

Table S2 Continued

| Gene_marker | P_val     | Avg_logFC   | Pct.1 | Pct.2 | P_val_adj | Cluster |
|-------------|-----------|-------------|-------|-------|-----------|---------|
| CD302       | 1.33E-198 | 0.689522609 | 0.36  | 0.003 | 2.08E-194 | 8       |
| ADGRE2      | 1.36E-198 | 0.693957372 | 0.34  | 0.002 | 2.13E-194 | 8       |
| MNDA        | 5.94E-188 | 1.617733818 | 0.8   | 0.027 | 9.31E-184 | 8       |
| C19orf38    | 1.25E-187 | 1.113888738 | 0.66  | 0.017 | 1.96E-183 | 8       |
| PRAM1       | 5.58E-185 | 0.920804671 | 0.4   | 0.004 | 8.74E-181 | 8       |
| RETN        | 9.78E-185 | 0.915668746 | 0.4   | 0.004 | 1.53E-180 | 8       |
| IFI30       | 1.55E-178 | 0.978802169 | 0.54  | 0.011 | 2.43E-174 | 8       |
| FCER1G      | 5.74E-169 | 3.269127652 | 1     | 0.057 | 9.00E-165 | 8       |
| RAB31       | 1.71E-168 | 0.612628017 | 0.36  | 0.004 | 2.67E-164 | 8       |
| FCGR2A      | 3.19E-166 | 0.926556969 | 0.46  | 0.008 | 5.00E-162 | 8       |
| BATF3       | 1.67E-160 | 0.648734475 | 0.28  | 0.002 | 2.63E-156 | 8       |
| PPM1N       | 1.14E-157 | 1.330522424 | 0.72  | 0.026 | 1.78E-153 | 8       |
| CD300LF     | 1.56E-145 | 0.53343948  | 0.26  | 0.002 | 2.44E-141 | 8       |
| RNF144B     | 2.24E-145 | 0.818229322 | 0.36  | 0.005 | 3.51E-141 | 8       |
| S100A8      | 6.17E-144 | 1.624988557 | 0.62  | 0.021 | 9.68E-140 | 8       |
| ADGRE1      | 5.48E-143 | 0.805083989 | 0.42  | 0.008 | 8.59E-139 | 8       |
| CAMK1       | 1.33E-140 | 0.767444848 | 0.46  | 0.01  | 2.08E-136 | 8       |
| IFITM3      | 1.22E-138 | 3.14950733  | 1     | 0.073 | 1.92E-134 | 8       |
| LST1        | 1.06E-133 | 3.713815859 | 1     | 0.078 | 1.67E-129 | 8       |
| CD86        | 1.12E-132 | 0.803368936 | 0.46  | 0.011 | 1.76E-128 | 8       |
| IL3RA       | 7.65E-126 | 0.503292118 | 0.26  | 0.003 | 1.20E-121 | 8       |
| TYROBP      | 1.58E-114 | 3.137018335 | 1     | 0.094 | 2.48E-110 | 8       |
| MPEG1       | 1.08E-109 | 0.972064658 | 0.54  | 0.021 | 1.69E-105 | 8       |
| AIF1        | 2.59E-108 | 3.459377283 | 1     | 0.102 | 4.06E-104 | 8       |
| DOCK5       | 1.50E-107 | 0.601556138 | 0.28  | 0.004 | 2.35E-103 | 8       |
| CEBPA       | 5.90E-107 | 0.493849006 | 0.26  | 0.004 | 9.25E-103 | 8       |
| FCGR3A      | 4.07E-103 | 2.390812576 | 1     | 0.106 | 6.38E-99  | 8       |
| TYMP        | 2.75E-102 | 2.11930838  | 0.98  | 0.1   | 4.32E-98  | 8       |
| WARS        | 1.23E-101 | 1.133973017 | 0.6   | 0.029 | 1.92E-97  | 8       |
| SAMD4A      | 3.90E-99  | 0.433723128 | 0.26  | 0.004 | 6.11E-95  | 8       |

Table S2 Continued

| Gene_marker | P_val    | Avg_logFC   | Pct.1 | Pct.2 | P_val_adj | Cluster |
|-------------|----------|-------------|-------|-------|-----------|---------|
| IRAK3       | 2.05E-98 | 0.628181066 | 0.36  | 0.009 | 3.21E-94  | 8       |
| DUSP6       | 8.48E-92 | 0.868489884 | 0.56  | 0.028 | 1.33E-87  | 8       |
| LILRB1      | 1.05E-88 | 1.123027018 | 0.6   | 0.034 | 1.64E-84  | 8       |
| THEMIS2     | 2.75E-86 | 0.881475128 | 0.48  | 0.022 | 4.31E-82  | 8       |
| PECAM1      | 4.16E-85 | 1.237113722 | 0.8   | 0.067 | 6.52E-81  | 8       |
| P2RX1       | 4.54E-85 | 0.515193125 | 0.28  | 0.006 | 7.11E-81  | 8       |
| LYN         | 4.00E-82 | 1.270752793 | 0.82  | 0.073 | 6.28E-78  | 8       |
| SIGLEC10    | 7.22E-81 | 0.925535401 | 0.5   | 0.026 | 1.13E-76  | 8       |
| CPPED1      | 1.03E-80 | 0.903456642 | 0.52  | 0.028 | 1.61E-76  | 8       |
| ICAM4       | 4.57E-77 | 0.582025715 | 0.28  | 0.007 | 7.16E-73  | 8       |
| SLC2A6      | 2.84E-75 | 0.882508114 | 0.5   | 0.028 | 4.44E-71  | 8       |
| CDH23       | 8.76E-75 | 0.446398509 | 0.26  | 0.006 | 1.37E-70  | 8       |
| RAB24       | 1.51E-72 | 0.800303667 | 0.6   | 0.041 | 2.37E-68  | 8       |
| SCIMP       | 8.11E-71 | 0.745022891 | 0.4   | 0.018 | 1.27E-66  | 8       |
| TNFSF13B    | 6.24E-66 | 0.648191017 | 0.42  | 0.022 | 9.78E-62  | 8       |
| SOD2        | 8.66E-65 | 1.281383165 | 0.76  | 0.079 | 1.36E-60  | 8       |
| LGALS3      | 1.11E-64 | 0.902181761 | 0.52  | 0.036 | 1.74E-60  | 8       |
| GCA         | 7.04E-63 | 0.896023147 | 0.56  | 0.043 | 1.10E-58  | 8       |
| ASAH1       | 1.20E-62 | 1.259915825 | 0.88  | 0.115 | 1.88E-58  | 8       |
| TIMP1       | 1.80E-60 | 1.330983482 | 0.84  | 0.106 | 2.82E-56  | 8       |
| ARRB1       | 1.88E-59 | 0.427030805 | 0.28  | 0.01  | 2.94E-55  | 8       |
| RNF130      | 4.48E-59 | 1.016938286 | 0.66  | 0.063 | 7.02E-55  | 8       |
| SLC7A7      | 9.97E-59 | 0.882320195 | 0.54  | 0.042 | 1.56E-54  | 8       |
| TBXAS1      | 2.61E-58 | 0.789346606 | 0.46  | 0.031 | 4.09E-54  | 8       |
| OAS1        | 7.42E-58 | 0.9523526   | 0.66  | 0.064 | 1.16E-53  | 8       |
| BRI3        | 1.04E-57 | 1.114026269 | 0.68  | 0.07  | 1.62E-53  | 8       |
| ATP6V1B2    | 1.67E-57 | 0.905392252 | 0.62  | 0.056 | 2.61E-53  | 8       |
| NPC2        | 1.79E-57 | 1.769279211 | 0.98  | 0.194 | 2.80E-53  | 8       |
| CUX1        | 4.23E-57 | 0.816940863 | 0.52  | 0.04  | 6.63E-53  | 8       |
| BEST1       | 1.24E-56 | 0.808917725 | 0.56  | 0.046 | 1.95E-52  | 8       |

Table S2 Continued

| Gene_marker | P_val    | Avg_logFC   | Pct.1 | Pct.2 | P_val_adj | Cluster |
|-------------|----------|-------------|-------|-------|-----------|---------|
| STX11       | 2.76E-55 | 0.927816637 | 0.5   | 0.039 | 4.33E-51  | 8       |
| CEBPD       | 6.86E-55 | 0.804945808 | 0.38  | 0.022 | 1.08E-50  | 8       |
| STXBP2      | 1.50E-52 | 1.734442856 | 0.9   | 0.168 | 2.35E-48  | 8       |
| MAPKAPK3    | 1.98E-52 | 0.835943354 | 0.64  | 0.064 | 3.10E-48  | 8       |
| NUP214      | 2.76E-52 | 0.75176873  | 0.48  | 0.037 | 4.33E-48  | 8       |
| TKT         | 4.99E-52 | 1.518017518 | 0.9   | 0.158 | 7.82E-48  | 8       |
| NAMPT       | 1.12E-50 | 0.802692516 | 0.48  | 0.038 | 1.76E-46  | 8       |
| SMCO4       | 4.61E-49 | 0.87018692  | 0.6   | 0.061 | 7.22E-45  | 8       |
| CYBB        | 1.00E-47 | 0.704511872 | 0.42  | 0.031 | 1.57E-43  | 8       |
| TNFSF10     | 1.12E-47 | 1.334461738 | 0.76  | 0.114 | 1.76E-43  | 8       |
| CEBPB       | 1.30E-47 | 1.350220261 | 0.94  | 0.19  | 2.04E-43  | 8       |
| CTSS        | 1.62E-47 | 2.40944544  | 1     | 0.324 | 2.54E-43  | 8       |
| ITGAX       | 8.44E-47 | 0.464706986 | 0.26  | 0.012 | 1.32E-42  | 8       |
| UNC119      | 1.02E-43 | 0.911042182 | 0.58  | 0.064 | 1.60E-39  | 8       |
| SULT1A1     | 1.99E-42 | 0.558933772 | 0.32  | 0.02  | 3.12E-38  | 8       |
| RALB        | 2.24E-42 | 0.691440221 | 0.52  | 0.052 | 3.52E-38  | 8       |
| SCPEP1      | 5.91E-42 | 0.569638996 | 0.38  | 0.029 | 9.27E-38  | 8       |
| PSAP        | 1.23E-41 | 2.102174646 | 1     | 0.401 | 1.92E-37  | 8       |
| MAP3K7CL    | 3.23E-41 | 0.627346682 | 0.26  | 0.014 | 5.06E-37  | 8       |
| HHEX        | 3.23E-41 | 0.555177482 | 0.34  | 0.024 | 5.07E-37  | 8       |
| S100A11     | 2.20E-40 | 2.006788942 | 1     | 0.411 | 3.44E-36  | 8       |
| SAT1        | 8.06E-40 | 2.380784655 | 1     | 0.435 | 1.26E-35  | 8       |
| C15orf39    | 1.28E-39 | 0.504515352 | 0.32  | 0.022 | 2.01E-35  | 8       |
| ODF3B       | 6.98E-39 | 0.574366902 | 0.34  | 0.025 | 1.09E-34  | 8       |
| C1orf162    | 8.81E-39 | 1.333235891 | 0.78  | 0.153 | 1.38E-34  | 8       |
| HVCN1       | 1.37E-38 | 0.549692788 | 0.38  | 0.031 | 2.14E-34  | 8       |
| LY96        | 9.51E-38 | 1.031228754 | 0.64  | 0.095 | 1.49E-33  | 8       |
| BID         | 1.95E-37 | 0.996609214 | 0.66  | 0.098 | 3.06E-33  | 8       |
| RIN3        | 3.40E-36 | 0.71815728  | 0.44  | 0.045 | 5.33E-32  | 8       |
| ZFAND5      | 3.40E-36 | 1.131006142 | 0.76  | 0.148 | 5.33E-32  | 8       |

Table S2 Continued

| Gene_marker | P_val    | Avg_logFC   | Pct.1 | Pct.2 | P_val_adj | Cluster |
|-------------|----------|-------------|-------|-------|-----------|---------|
| C20orf27    | 4.68E-36 | 0.755180729 | 0.52  | 0.062 | 7.34E-32  | 8       |
| RGS2        | 1.77E-35 | 1.130006501 | 0.64  | 0.102 | 2.78E-31  | 8       |
| ATG3        | 3.41E-34 | 1.084119802 | 0.68  | 0.118 | 5.35E-30  | 8       |
| FTH1        | 4.57E-34 | 2.402480627 | 1     | 0.971 | 7.17E-30  | 8       |
| FTL         | 4.73E-34 | 2.031734182 | 1     | 0.98  | 7.42E-30  | 8       |
| FKBP1A      | 5.92E-33 | 1.200480973 | 0.98  | 0.355 | 9.29E-29  | 8       |
| BLVRA       | 2.31E-32 | 0.732630607 | 0.46  | 0.054 | 3.63E-28  | 8       |
| BLVRB       | 2.33E-31 | 0.505689319 | 0.34  | 0.031 | 3.65E-27  | 8       |
| BCL2A1      | 4.23E-31 | 1.049520206 | 0.66  | 0.12  | 6.63E-27  | 8       |
| TESC        | 4.57E-31 | 0.98310888  | 0.6   | 0.096 | 7.16E-27  | 8       |
| MARCH1      | 8.70E-31 | 0.694631154 | 0.56  | 0.08  | 1.36E-26  | 8       |
| S100A6      | 1.21E-30 | 1.596372859 | 1     | 0.843 | 1.90E-26  | 8       |
| LGALS9      | 2.66E-30 | 0.85671542  | 0.68  | 0.121 | 4.18E-26  | 8       |
| LGALS1      | 4.68E-30 | 1.480099062 | 1     | 0.437 | 7.33E-26  | 8       |
| IFITM2      | 1.39E-29 | 1.586633872 | 0.98  | 0.59  | 2.18E-25  | 8       |
| C10orf54    | 3.49E-29 | 1.252504808 | 0.86  | 0.242 | 5.47E-25  | 8       |
| RARA        | 5.12E-29 | 0.623431119 | 0.38  | 0.041 | 8.03E-25  | 8       |
| SNX27       | 8.58E-29 | 0.605829724 | 0.4   | 0.046 | 1.35E-24  | 8       |
| CD300A      | 9.75E-29 | 0.677404343 | 0.44  | 0.055 | 1.53E-24  | 8       |
| TNFRSF1B    | 2.59E-28 | 1.036229939 | 0.68  | 0.142 | 4.06E-24  | 8       |
| IFNGR1      | 6.87E-28 | 0.63579641  | 0.5   | 0.07  | 1.08E-23  | 8       |
| S100A4      | 6.95E-28 | 1.283928319 | 1     | 0.872 | 1.09E-23  | 8       |
| RHOC        | 1.16E-27 | 1.052749458 | 0.76  | 0.177 | 1.81E-23  | 8       |
| NAPRT       | 1.33E-27 | 0.511939014 | 0.34  | 0.035 | 2.09E-23  | 8       |
| NADK        | 3.37E-27 | 0.630757253 | 0.42  | 0.053 | 5.28E-23  | 8       |
| CD55        | 4.95E-27 | 0.643552947 | 0.5   | 0.073 | 7.76E-23  | 8       |
| SDCBP       | 7.59E-27 | 0.891509301 | 0.74  | 0.157 | 1.19E-22  | 8       |
| C9orf72     | 8.13E-27 | 0.578675131 | 0.32  | 0.032 | 1.27E-22  | 8       |
| UBXN11      | 1.04E-26 | 0.630274595 | 0.48  | 0.068 | 1.64E-22  | 8       |
| COTL1       | 3.07E-26 | 1.086102857 | 1     | 0.679 | 4.81E-22  | 8       |



Table S2 Continued

| Gene_marker | P_val    | Avg_logFC   | Pct.1 | Pct.2 | P_val_adj | Cluster |
|-------------|----------|-------------|-------|-------|-----------|---------|
| IFNGR2      | 4.04E-26 | 0.680855783 | 0.4   | 0.052 | 6.33E-22  | 8       |
| VMP1        | 9.86E-26 | 1.070509468 | 0.78  | 0.197 | 1.54E-21  | 8       |
| EVI2B       | 1.02E-25 | 1.279423535 | 0.98  | 0.44  | 1.60E-21  | 8       |
| MSRB1       | 1.11E-25 | 0.582725998 | 0.4   | 0.051 | 1.74E-21  | 8       |
| FAM49A      | 1.88E-25 | 0.514193276 | 0.32  | 0.034 | 2.95E-21  | 8       |
| AP1S2       | 2.97E-25 | 0.91133967  | 0.72  | 0.161 | 4.66E-21  | 8       |
| OAZ1        | 4.25E-25 | 0.887656228 | 1     | 0.901 | 6.67E-21  | 8       |
| GRN         | 8.44E-25 | 0.729660929 | 0.64  | 0.126 | 1.32E-20  | 8       |
| PYCARD      | 8.70E-25 | 1.108458716 | 0.9   | 0.292 | 1.36E-20  | 8       |
| CARD16      | 2.30E-24 | 1.152908908 | 0.92  | 0.335 | 3.60E-20  | 8       |
| NUMB        | 3.11E-24 | 0.610796469 | 0.46  | 0.069 | 4.87E-20  | 8       |
| PAK1        | 3.26E-24 | 0.456712787 | 0.28  | 0.028 | 5.11E-20  | 8       |
| SNX10       | 4.18E-24 | 0.79911623  | 0.52  | 0.092 | 6.55E-20  | 8       |
| UBE2D1      | 4.57E-24 | 0.721756106 | 0.52  | 0.089 | 7.16E-20  | 8       |
| FAM45A      | 8.01E-24 | 0.592286905 | 0.56  | 0.097 | 1.26E-19  | 8       |
| DPEP2       | 1.31E-23 | 0.556108541 | 0.34  | 0.041 | 2.06E-19  | 8       |
| CAPZA2      | 3.42E-23 | 0.852405342 | 0.88  | 0.259 | 5.36E-19  | 8       |
| TSPO        | 5.51E-23 | 1.06884555  | 0.88  | 0.328 | 8.64E-19  | 8       |
| ARAP1       | 1.13E-22 | 0.480864996 | 0.36  | 0.046 | 1.78E-18  | 8       |
| NUDT16      | 1.21E-22 | 0.499709996 | 0.3   | 0.034 | 1.90E-18  | 8       |
| NAGK        | 2.87E-22 | 0.668971175 | 0.44  | 0.071 | 4.50E-18  | 8       |
| ARL4A       | 4.99E-22 | 0.638857851 | 0.46  | 0.076 | 7.82E-18  | 8       |
| ANXA5       | 7.20E-22 | 0.750200383 | 0.82  | 0.221 | 1.13E-17  | 8       |
| CASP1       | 9.14E-22 | 0.982400087 | 0.76  | 0.209 | 1.43E-17  | 8       |
| HLA-DPA1    | 1.71E-21 | 1.029041056 | 1     | 0.681 | 2.69E-17  | 8       |
| RNH1        | 1.79E-21 | 0.856405451 | 0.78  | 0.222 | 2.80E-17  | 8       |
| PRKCD       | 1.91E-21 | 0.470871084 | 0.3   | 0.035 | 2.99E-17  | 8       |
| ARRB2       | 2.18E-21 | 0.865382246 | 0.84  | 0.247 | 3.42E-17  | 8       |
| VAMP5       | 2.37E-21 | 1.071662008 | 0.84  | 0.295 | 3.72E-17  | 8       |
| GNGT2       | 2.79E-21 | 0.418803904 | 0.32  | 0.039 | 4.38E-17  | 8       |

Table S2 Continued

| Gene_marker | P_val    | Avg_logFC   | Pct.1 | Pct.2 | P_val_adj | Cluster |
|-------------|----------|-------------|-------|-------|-----------|---------|
| NEAT1       | 4.90E-21 | 1.088630499 | 1     | 0.64  | 7.69E-17  | 8       |
| RTN3        | 8.84E-21 | 0.563494768 | 0.44  | 0.072 | 1.39E-16  | 8       |
| JAML        | 8.94E-21 | 0.625899577 | 0.42  | 0.068 | 1.40E-16  | 8       |
| VASP        | 9.14E-21 | 0.918792429 | 0.76  | 0.213 | 1.43E-16  | 8       |
| CD4         | 2.33E-20 | 0.459864791 | 0.38  | 0.056 | 3.66E-16  | 8       |
| LTA4H       | 2.75E-20 | 0.811727219 | 0.56  | 0.118 | 4.32E-16  | 8       |
| GLUL        | 3.30E-20 | 0.827517237 | 0.5   | 0.097 | 5.18E-16  | 8       |
| MBD2        | 4.06E-20 | 0.405446052 | 0.3   | 0.037 | 6.36E-16  | 8       |
| FAM110A     | 9.04E-20 | 0.588218574 | 0.32  | 0.043 | 1.42E-15  | 8       |
| NFKBIZ      | 1.30E-19 | 0.584240621 | 0.48  | 0.089 | 2.04E-15  | 8       |
| SLC1A5      | 1.51E-19 | 0.395754036 | 0.26  | 0.029 | 2.37E-15  | 8       |
| FGR         | 1.53E-19 | 0.818320377 | 0.7   | 0.184 | 2.40E-15  | 8       |
| RNPEP       | 2.05E-19 | 0.489296066 | 0.34  | 0.048 | 3.21E-15  | 8       |
| DUSP1       | 2.19E-19 | 0.955371745 | 1     | 0.734 | 3.43E-15  | 8       |
| LYL1        | 4.13E-19 | 0.66480188  | 0.38  | 0.062 | 6.48E-15  | 8       |
| NAP1L1      | 5.33E-19 | 0.951224388 | 1     | 0.575 | 8.36E-15  | 8       |
| RELT        | 9.58E-19 | 0.424939747 | 0.3   | 0.039 | 1.50E-14  | 8       |
| SNX18       | 1.05E-18 | 0.596084137 | 0.36  | 0.056 | 1.64E-14  | 8       |
| HLA-DRA     | 1.19E-18 | 0.944127206 | 1     | 0.614 | 1.86E-14  | 8       |
| MTSS1       | 1.49E-18 | 0.595655714 | 0.38  | 0.062 | 2.34E-14  | 8       |
| MT2A        | 1.70E-18 | 1.412777551 | 0.92  | 0.468 | 2.67E-14  | 8       |
| ALOX5       | 1.71E-18 | 0.535621596 | 0.42  | 0.072 | 2.69E-14  | 8       |
| PPT1        | 2.04E-18 | 0.654342516 | 0.56  | 0.125 | 3.19E-14  | 8       |
| CALM2       | 3.05E-18 | 0.911842072 | 0.98  | 0.714 | 4.78E-14  | 8       |
| UBE2J1      | 3.77E-18 | 0.605901203 | 0.58  | 0.131 | 5.91E-14  | 8       |
| NINJ1       | 3.97E-18 | 0.572229682 | 0.42  | 0.074 | 6.22E-14  | 8       |
| ATP6V0D1    | 4.01E-18 | 0.602236768 | 0.54  | 0.117 | 6.28E-14  | 8       |
| RNF13       | 4.20E-18 | 0.759704851 | 0.5   | 0.108 | 6.59E-14  | 8       |
| MT-CO1      | 1.59E-17 | 0.522470568 | 1     | 0.998 | 2.49E-13  | 8       |
| TCIRG1      | 1.87E-17 | 0.679347184 | 0.58  | 0.142 | 2.93E-13  | 8       |

Table S2 Continued

| Gene_marker | P_val    | Avg_logFC   | Pct.1 | Pct.2 | P_val_adj | Cluster |
|-------------|----------|-------------|-------|-------|-----------|---------|
| BTK         | 2.12E-17 | 0.521880518 | 0.4   | 0.072 | 3.32E-13  | 8       |
| HOTAIRM1    | 2.21E-17 | 0.482527865 | 0.36  | 0.058 | 3.47E-13  | 8       |
| ZYX         | 2.50E-17 | 0.646003736 | 0.66  | 0.17  | 3.92E-13  | 8       |
| IMPDH1      | 2.82E-17 | 0.511248597 | 0.44  | 0.083 | 4.42E-13  | 8       |
| PGLS        | 2.86E-17 | 0.692405357 | 0.68  | 0.182 | 4.49E-13  | 8       |
| NANS        | 5.10E-17 | 0.445440138 | 0.32  | 0.049 | 7.99E-13  | 8       |
| H3F3A       | 9.13E-17 | 0.68404998  | 0.98  | 0.882 | 1.43E-12  | 8       |
| DRAP1       | 9.84E-17 | 0.766733154 | 0.96  | 0.475 | 1.54E-12  | 8       |
| VIM         | 1.55E-16 | 0.807906408 | 0.98  | 0.563 | 2.44E-12  | 8       |
| AGTRAP      | 1.62E-16 | 0.684911806 | 0.5   | 0.109 | 2.54E-12  | 8       |
| RPS9        | 3.77E-16 | 0.446450038 | 1     | 0.995 | 5.91E-12  | 8       |
| APLP2       | 3.92E-16 | 0.542933814 | 0.44  | 0.089 | 6.14E-12  | 8       |
| SERTAD3     | 4.34E-16 | 0.321101518 | 0.26  | 0.035 | 6.80E-12  | 8       |
| SNAP23      | 6.45E-16 | 0.639300847 | 0.64  | 0.168 | 1.01E-11  | 8       |
| RNF149      | 8.92E-16 | 0.655855157 | 0.68  | 0.193 | 1.40E-11  | 8       |
| ANXA2       | 9.42E-16 | 0.851478894 | 0.76  | 0.271 | 1.48E-11  | 8       |
| GPX1        | 1.53E-15 | 0.972518421 | 0.82  | 0.323 | 2.41E-11  | 8       |
| SNX2        | 1.75E-15 | 0.589760983 | 0.48  | 0.107 | 2.75E-11  | 8       |
| POU2F2      | 1.86E-15 | 0.762772322 | 0.54  | 0.144 | 2.92E-11  | 8       |
| ATOX1       | 2.25E-15 | 0.632117025 | 0.54  | 0.133 | 3.53E-11  | 8       |
| LINC00936   | 2.37E-15 | 0.697959831 | 0.42  | 0.089 | 3.72E-11  | 8       |
| HSBP1       | 2.63E-15 | 0.758361698 | 0.56  | 0.153 | 4.12E-11  | 8       |
| CNIH4       | 3.40E-15 | 0.584619913 | 0.54  | 0.13  | 5.33E-11  | 8       |
| UNC93B1     | 3.64E-15 | 0.485852976 | 0.3   | 0.048 | 5.71E-11  | 8       |
| RGS19       | 3.96E-15 | 0.753303382 | 0.72  | 0.228 | 6.21E-11  | 8       |
| EIF4EBP1    | 4.34E-15 | 0.46127398  | 0.28  | 0.043 | 6.81E-11  | 8       |
| RHOG        | 4.77E-15 | 0.744443819 | 0.78  | 0.267 | 7.47E-11  | 8       |
| CDC42EP3    | 5.76E-15 | 0.559954221 | 0.6   | 0.152 | 9.02E-11  | 8       |
| HN1         | 8.08E-15 | 0.666683238 | 0.78  | 0.249 | 1.27E-10  | 8       |
| NOTCH2      | 9.95E-15 | 0.43594245  | 0.26  | 0.038 | 1.56E-10  | 8       |

Table S2 Continued

| Gene_marker | P_val    | Avg_logFC   | Pct.1 | Pct.2 | P_val_adj | Cluster |
|-------------|----------|-------------|-------|-------|-----------|---------|
| SGPP1       | 1.31E-14 | 0.387379002 | 0.28  | 0.043 | 2.05E-10  | 8       |
| TALDO1      | 1.40E-14 | 0.741144033 | 0.68  | 0.219 | 2.19E-10  | 8       |
| RNASET2     | 1.58E-14 | 0.783470356 | 0.9   | 0.422 | 2.48E-10  | 8       |
| PABPC4      | 1.88E-14 | 0.60058448  | 0.58  | 0.153 | 2.94E-10  | 8       |
| MEF2C       | 2.64E-14 | 0.587556736 | 0.36  | 0.073 | 4.14E-10  | 8       |
| CYBA        | 2.92E-14 | 0.549819073 | 1     | 0.926 | 4.58E-10  | 8       |
| OAZ2        | 3.12E-14 | 0.517568708 | 0.46  | 0.104 | 4.90E-10  | 8       |
| PGK1        | 3.55E-14 | 0.738448475 | 0.86  | 0.343 | 5.56E-10  | 8       |
| PTPN6       | 3.68E-14 | 0.734806828 | 0.76  | 0.283 | 5.77E-10  | 8       |
| FCGRT       | 3.69E-14 | 0.677019897 | 0.5   | 0.128 | 5.79E-10  | 8       |
| GDI2        | 4.04E-14 | 0.761335669 | 0.82  | 0.404 | 6.34E-10  | 8       |
| AOAH        | 4.52E-14 | 0.411282928 | 0.4   | 0.08  | 7.08E-10  | 8       |
| SCO2        | 7.30E-14 | 0.371656764 | 0.26  | 0.04  | 1.14E-09  | 8       |
| ATP6V0B     | 8.50E-14 | 0.693411994 | 0.84  | 0.317 | 1.33E-09  | 8       |
| ATP1B3      | 1.19E-13 | 0.582156299 | 0.62  | 0.181 | 1.87E-09  | 8       |
| ARPC3       | 1.23E-13 | 0.647134665 | 1     | 0.733 | 1.93E-09  | 8       |
| GBP2        | 1.27E-13 | 0.609678377 | 0.68  | 0.207 | 1.99E-09  | 8       |
| CTSZ        | 3.45E-13 | 0.402368109 | 0.3   | 0.054 | 5.41E-09  | 8       |
| CSTB        | 3.49E-13 | 0.825114307 | 0.86  | 0.473 | 5.47E-09  | 8       |
| LAPTM4A     | 4.15E-13 | 0.590966986 | 0.8   | 0.276 | 6.51E-09  | 8       |
| CX3CR1      | 9.03E-13 | 0.493339463 | 0.44  | 0.104 | 1.42E-08  | 8       |
| WSB1        | 1.26E-12 | 0.765471525 | 0.64  | 0.223 | 1.97E-08  | 8       |
| MTPN        | 1.26E-12 | 0.462274653 | 0.56  | 0.148 | 1.98E-08  | 8       |
| CACUL1      | 1.46E-12 | 0.402431871 | 0.36  | 0.075 | 2.28E-08  | 8       |
| TMSB4X      | 1.89E-12 | 0.277221408 | 1     | 1     | 2.97E-08  | 8       |
| ZFP36       | 2.09E-12 | 0.804047001 | 0.88  | 0.426 | 3.27E-08  | 8       |
| NOP10       | 2.09E-12 | 0.706339608 | 0.84  | 0.388 | 3.28E-08  | 8       |
| NAAA        | 2.60E-12 | 0.64571223  | 0.4   | 0.097 | 4.07E-08  | 8       |
| LAMTOR4     | 2.72E-12 | 0.677319874 | 0.94  | 0.48  | 4.26E-08  | 8       |
| HLA-DRB1    | 3.31E-12 | 0.671248131 | 0.96  | 0.655 | 5.18E-08  | 8       |

Table S2 Continued

| Gene_marker | P_val    | Avg_logFC   | Pct.1 | Pct.2 | P_val_adj | Cluster |
|-------------|----------|-------------|-------|-------|-----------|---------|
| ABI3        | 3.62E-12 | 0.669688651 | 0.6   | 0.199 | 5.68E-08  | 8       |
| INSIG1      | 3.94E-12 | 0.487935261 | 0.42  | 0.1   | 6.18E-08  | 8       |
| NACA        | 4.04E-12 | 0.49208631  | 1     | 0.909 | 6.34E-08  | 8       |
| SLC25A6     | 4.30E-12 | 0.532329483 | 1     | 0.84  | 6.75E-08  | 8       |
| CMTM6       | 4.55E-12 | 0.535207231 | 0.66  | 0.204 | 7.14E-08  | 8       |
| ARPC1B      | 5.09E-12 | 0.521373049 | 0.98  | 0.702 | 7.98E-08  | 8       |
| PRELID1     | 6.39E-12 | 0.686972542 | 0.8   | 0.36  | 1.00E-07  | 8       |
| DOCK2       | 6.94E-12 | 0.397886726 | 0.36  | 0.078 | 1.09E-07  | 8       |
| GABARAP     | 7.93E-12 | 0.653525604 | 0.8   | 0.346 | 1.24E-07  | 8       |
| ITM2B       | 8.91E-12 | 0.662407391 | 0.98  | 0.829 | 1.40E-07  | 8       |
| YBX1        | 9.00E-12 | 0.571360953 | 1     | 0.805 | 1.41E-07  | 8       |
| STX10       | 9.36E-12 | 0.470411785 | 0.52  | 0.142 | 1.47E-07  | 8       |
| GNG5        | 1.56E-11 | 0.652388586 | 0.78  | 0.329 | 2.45E-07  | 8       |
| ACTB        | 1.73E-11 | 0.490301291 | 1     | 1     | 2.71E-07  | 8       |
| H2AFY       | 1.75E-11 | 0.543675616 | 0.66  | 0.228 | 2.74E-07  | 8       |
| LEPROT      | 1.88E-11 | 0.47453175  | 0.38  | 0.09  | 2.94E-07  | 8       |
| ZNF106      | 1.91E-11 | 0.36567573  | 0.36  | 0.079 | 2.99E-07  | 8       |
| ANXA4       | 2.00E-11 | 0.399621851 | 0.28  | 0.054 | 3.14E-07  | 8       |
| ADRBK1      | 2.05E-11 | 0.434697148 | 0.4   | 0.096 | 3.22E-07  | 8       |
| TMSB10      | 2.29E-11 | 0.344070047 | 1     | 1     | 3.59E-07  | 8       |
| ZEB2        | 2.30E-11 | 0.522990233 | 0.7   | 0.251 | 3.61E-07  | 8       |
| ACP5        | 2.43E-11 | 0.541215025 | 0.5   | 0.143 | 3.81E-07  | 8       |
| RBX1        | 2.44E-11 | 0.57159991  | 0.84  | 0.342 | 3.82E-07  | 8       |
| SYNGR2      | 4.91E-11 | 0.609514589 | 0.6   | 0.204 | 7.70E-07  | 8       |
| CECR1       | 5.54E-11 | 0.404372717 | 0.34  | 0.077 | 8.68E-07  | 8       |
| C11orf21    | 5.87E-11 | 0.470981267 | 0.38  | 0.092 | 9.20E-07  | 8       |
| ESRRA       | 7.88E-11 | 0.348856506 | 0.32  | 0.069 | 1.23E-06  | 8       |
| CTSB        | 8.08E-11 | 0.541044202 | 0.44  | 0.123 | 1.27E-06  | 8       |
| LAIR1       | 8.55E-11 | 0.3424936   | 0.28  | 0.055 | 1.34E-06  | 8       |
| CTSD        | 8.91E-11 | 0.606412457 | 0.66  | 0.245 | 1.40E-06  | 8       |

Table S2 Continued

| Gene_marker | P_val    | Avg_logFC   | Pct.1 | Pct.2 | P_val_adj | Cluster |
|-------------|----------|-------------|-------|-------|-----------|---------|
| TUBA1B      | 9.55E-11 | 0.615468567 | 0.8   | 0.373 | 1.50E-06  | 8       |
| HLA-DQA2    | 1.03E-10 | 0.725772886 | 0.82  | 0.383 | 1.62E-06  | 8       |
| VPS29       | 1.15E-10 | 0.534186344 | 0.64  | 0.226 | 1.80E-06  | 8       |
| CARD19      | 1.29E-10 | 0.372016318 | 0.28  | 0.056 | 2.02E-06  | 8       |
| GCH1        | 1.77E-10 | 0.44626444  | 0.32  | 0.073 | 2.78E-06  | 8       |
| DOK2        | 1.85E-10 | 0.575420816 | 0.82  | 0.325 | 2.90E-06  | 8       |
| RHOB        | 1.90E-10 | 0.451051181 | 0.42  | 0.114 | 2.97E-06  | 8       |
| RPS19       | 1.97E-10 | 0.273806962 | 1     | 1     | 3.09E-06  | 8       |
| CNPY3       | 2.00E-10 | 0.524629255 | 0.62  | 0.219 | 3.13E-06  | 8       |
| MYL6        | 2.21E-10 | 0.464767998 | 1     | 0.933 | 3.46E-06  | 8       |
| MGAT1       | 2.30E-10 | 0.413381532 | 0.48  | 0.136 | 3.60E-06  | 8       |
| ADA         | 2.67E-10 | 0.450735946 | 0.52  | 0.156 | 4.19E-06  | 8       |
| SAMHD1      | 2.79E-10 | 0.469320256 | 0.52  | 0.155 | 4.38E-06  | 8       |
| PIK3AP1     | 2.85E-10 | 0.420817924 | 0.3   | 0.066 | 4.46E-06  | 8       |
| CD74        | 2.96E-10 | 0.440648127 | 1     | 0.938 | 4.64E-06  | 8       |
| RPP25L      | 3.02E-10 | 0.334971318 | 0.3   | 0.065 | 4.73E-06  | 8       |
| ICAM2       | 3.71E-10 | 0.54647426  | 0.5   | 0.155 | 5.81E-06  | 8       |
| ARHGAP27    | 3.72E-10 | 0.43405006  | 0.28  | 0.06  | 5.83E-06  | 8       |
| PQLC3       | 4.13E-10 | 0.513229785 | 0.5   | 0.154 | 6.48E-06  | 8       |
| FOS         | 4.42E-10 | 0.807143685 | 0.86  | 0.473 | 6.94E-06  | 8       |
| CTSH        | 4.88E-10 | 0.385509284 | 0.34  | 0.081 | 7.64E-06  | 8       |
| AP2S1       | 5.01E-10 | 0.603823649 | 0.7   | 0.277 | 7.86E-06  | 8       |
| ID2         | 5.29E-10 | 0.630673386 | 0.84  | 0.433 | 8.29E-06  | 8       |
| EFHD2       | 5.61E-10 | 0.419938193 | 0.54  | 0.16  | 8.79E-06  | 8       |
| LAP3        | 6.29E-10 | 0.389477068 | 0.28  | 0.061 | 9.86E-06  | 8       |
| LAPTM5      | 7.57E-10 | 0.500334906 | 0.96  | 0.705 | 1.19E-05  | 8       |
| HLA-DPB1    | 8.21E-10 | 0.580807353 | 0.98  | 0.779 | 1.29E-05  | 8       |
| RAB10       | 8.25E-10 | 0.587078206 | 0.5   | 0.169 | 1.29E-05  | 8       |
| SKAP2       | 8.35E-10 | 0.38236173  | 0.3   | 0.068 | 1.31E-05  | 8       |
| LYST        | 8.42E-10 | 0.461249356 | 0.4   | 0.109 | 1.32E-05  | 8       |

Table S2 Continued

| Gene_marker | P_val    | Avg_logFC   | Pct.1 | Pct.2 | P_val_adj   | Cluster |
|-------------|----------|-------------|-------|-------|-------------|---------|
| PSMA4       | 8.67E-10 | 0.597439316 | 0.86  | 0.436 | 1.36E-05    | 8       |
| HLA-DQA1    | 1.21E-09 | 0.516028862 | 0.74  | 0.29  | 1.90E-05    | 8       |
| EIF4E2      | 1.35E-09 | 0.401479888 | 0.46  | 0.133 | 2.12E-05    | 8       |
| NRBF2       | 1.53E-09 | 0.364660863 | 0.32  | 0.076 | 2.40E-05    | 8       |
| GRINA       | 2.43E-09 | 0.336140147 | 0.26  | 0.055 | 3.81E-05    | 8       |
| UPP1        | 2.90E-09 | 0.282604687 | 0.34  | 0.083 | 4.55E-05    | 8       |
| ARPC5       | 3.08E-09 | 0.611100768 | 0.88  | 0.517 | 4.83E-05    | 8       |
| CD48        | 3.21E-09 | 0.578098124 | 0.86  | 0.532 | 5.03E-05    | 8       |
| ATG16L2     | 3.51E-09 | 0.362177621 | 0.3   | 0.071 | 5.50E-05    | 8       |
| AP2A1       | 3.58E-09 | 0.386003182 | 0.28  | 0.064 | 5.62E-05    | 8       |
| GLRX        | 3.73E-09 | 0.536739969 | 0.56  | 0.203 | 5.85E-05    | 8       |
| SLIRP       | 4.17E-09 | 0.468499989 | 0.62  | 0.224 | 6.54E-05    | 8       |
| TUBA1A      | 4.29E-09 | 0.574824351 | 0.72  | 0.323 | 6.72E-05    | 8       |
| CYSLTR1     | 4.39E-09 | 0.259710326 | 0.28  | 0.062 | 6.88E-05    | 8       |
| GSTO1       | 4.44E-09 | 0.512900464 | 0.54  | 0.185 | 6.96E-05    | 8       |
| ITGB2       | 4.80E-09 | 0.527872042 | 1     | 0.668 | 7.53E-05    | 8       |
| TLE4        | 4.84E-09 | 0.373781788 | 0.42  | 0.119 | 7.59E-05    | 8       |
| BCCIP       | 4.94E-09 | 0.265218184 | 0.26  | 0.056 | 7.74E-05    | 8       |
| PLEKHO1     | 5.57E-09 | 0.399983965 | 0.26  | 0.058 | 8.72E-05    | 8       |
| CAPNS1      | 5.80E-09 | 0.387282799 | 0.38  | 0.106 | 9.09E-05    | 8       |
| FAM96A      | 5.98E-09 | 0.443687528 | 0.46  | 0.143 | 9.38E-05    | 8       |
| PTEN        | 6.54E-09 | 0.306218803 | 0.32  | 0.078 | 0.000102507 | 8       |
| MT-ATP6     | 6.84E-09 | 0.467936472 | 1     | 0.901 | 0.000107258 | 8       |
| MYD88       | 6.98E-09 | 0.407390008 | 0.32  | 0.082 | 0.00010938  | 8       |
| RABGAP1L    | 7.63E-09 | 0.441944873 | 0.46  | 0.143 | 0.000119654 | 8       |
| CTSC        | 7.77E-09 | 0.536359172 | 0.8   | 0.375 | 0.000121878 | 8       |
| ENY2        | 7.91E-09 | 0.48851061  | 0.64  | 0.244 | 0.000123943 | 8       |
| GRB2        | 9.43E-09 | 0.44137146  | 0.58  | 0.207 | 0.000147798 | 8       |
| LAMP2       | 9.87E-09 | 0.386821876 | 0.34  | 0.089 | 0.000154682 | 8       |
| GMFG        | 9.94E-09 | 0.47310163  | 0.98  | 0.697 | 0.000155884 | 8       |

Table S2 Continued

| Gene_marker | P_val    | Avg_logFC   | Pct.1 | Pct.2 | P_val_adj   | Cluster |
|-------------|----------|-------------|-------|-------|-------------|---------|
| EPSTI1      | 1.11E-08 | 0.418003028 | 0.38  | 0.109 | 0.000174761 | 8       |
| SMAP2       | 1.16E-08 | 0.363978133 | 0.38  | 0.107 | 0.000181989 | 8       |
| SNX3        | 1.21E-08 | 0.510592076 | 0.84  | 0.455 | 0.000190431 | 8       |
| PSMC2       | 1.23E-08 | 0.312172839 | 0.38  | 0.104 | 0.000193175 | 8       |
| SERF2       | 1.24E-08 | 0.355955757 | 1     | 0.967 | 0.000194178 | 8       |
| VNN2        | 1.59E-08 | 0.431349921 | 0.36  | 0.102 | 0.000248759 | 8       |
| DNAJB12     | 1.80E-08 | 0.257535841 | 0.26  | 0.058 | 0.000282261 | 8       |
| CHCHD10     | 2.54E-08 | 0.483845583 | 0.6   | 0.234 | 0.000397541 | 8       |
| MYADM       | 2.54E-08 | 0.424758966 | 0.3   | 0.078 | 0.000398578 | 8       |
| BLOC1S1     | 2.60E-08 | 0.565342665 | 0.8   | 0.402 | 0.000407989 | 8       |
| SHKBP1      | 2.62E-08 | 0.446623727 | 0.54  | 0.19  | 0.000411186 | 8       |
| RAC1        | 2.75E-08 | 0.51062693  | 0.78  | 0.363 | 0.000430782 | 8       |
| SRA1        | 2.89E-08 | 0.322455538 | 0.3   | 0.076 | 0.000453038 | 8       |
| AGPAT2      | 3.48E-08 | 0.337215869 | 0.28  | 0.069 | 0.000545332 | 8       |
| VAMP8       | 3.56E-08 | 0.551241137 | 0.8   | 0.437 | 0.000557897 | 8       |
| HDAC5       | 3.81E-08 | 0.294731576 | 0.28  | 0.068 | 0.000596604 | 8       |
| SRGN        | 4.36E-08 | 0.476090101 | 0.96  | 0.707 | 0.000683211 | 8       |
| EPN1        | 5.42E-08 | 0.343921805 | 0.28  | 0.07  | 0.000849989 | 8       |
| ASCL2       | 5.53E-08 | 0.354211132 | 0.28  | 0.07  | 0.000867145 | 8       |
| UBE2R2      | 5.91E-08 | 0.361336802 | 0.28  | 0.072 | 0.000927008 | 8       |
| SERP1       | 5.94E-08 | 0.589907086 | 0.84  | 0.49  | 0.000931351 | 8       |
| COX5B       | 6.43E-08 | 0.47585461  | 0.98  | 0.617 | 0.001007523 | 8       |
| TPI1        | 6.63E-08 | 0.533305381 | 0.88  | 0.474 | 0.001039801 | 8       |
| CBWD1       | 7.67E-08 | 0.262152418 | 0.28  | 0.07  | 0.001202391 | 8       |
| ZNF706      | 7.72E-08 | 0.457064439 | 0.66  | 0.268 | 0.001210235 | 8       |
| MOB1A       | 8.93E-08 | 0.463598387 | 0.64  | 0.252 | 0.001399958 | 8       |
| HAGH        | 9.02E-08 | 0.35073274  | 0.42  | 0.133 | 0.001413675 | 8       |
| OSTF1       | 9.75E-08 | 0.450270099 | 0.72  | 0.309 | 0.001528616 | 8       |
| OSBPL8      | 9.99E-08 | 0.266712055 | 0.36  | 0.102 | 0.00156606  | 8       |
| POLE4       | 1.06E-07 | 0.473032263 | 0.48  | 0.171 | 0.00166052  | 8       |



Table S2 Continued

| Gene_marker | P_val    | Avg_logFC   | Pct.1 | Pct.2 | P_val_adj   | Cluster |
|-------------|----------|-------------|-------|-------|-------------|---------|
| ERP44       | 1.11E-07 | 0.32759855  | 0.5   | 0.168 | 0.001736801 | 8       |
| ADAM10      | 1.25E-07 | 0.3460711   | 0.36  | 0.105 | 0.00195667  | 8       |
| SPINT2      | 1.25E-07 | 0.337969473 | 0.32  | 0.091 | 0.001959672 | 8       |
| SSH2        | 1.43E-07 | 0.308136494 | 0.3   | 0.08  | 0.00223823  | 8       |
| MT-ND1      | 1.50E-07 | 0.435973053 | 0.96  | 0.795 | 0.002357446 | 8       |
| PLSCR1      | 1.57E-07 | 0.361535943 | 0.26  | 0.066 | 0.002454809 | 8       |
| MT-CYB      | 1.62E-07 | 0.33810049  | 1     | 0.964 | 0.002539839 | 8       |
| ATP2B1      | 1.73E-07 | 0.312960185 | 0.4   | 0.123 | 0.002710346 | 8       |
| POLD4       | 1.83E-07 | 0.453376042 | 0.54  | 0.204 | 0.002864157 | 8       |
| COX8A       | 2.06E-07 | 0.533877732 | 0.84  | 0.488 | 0.003232028 | 8       |
| SMS         | 2.26E-07 | 0.444630619 | 0.5   | 0.19  | 0.003549139 | 8       |
| GPR65       | 2.42E-07 | 0.461128752 | 0.46  | 0.166 | 0.003789736 | 8       |
| SH3BP2      | 2.72E-07 | 0.33825055  | 0.3   | 0.083 | 0.004256449 | 8       |
| NMI         | 2.93E-07 | 0.340925166 | 0.34  | 0.1   | 0.004590302 | 8       |
| UTRN        | 3.24E-07 | 0.303860401 | 0.38  | 0.118 | 0.005086081 | 8       |
| PLIN2       | 3.61E-07 | 0.289727272 | 0.28  | 0.076 | 0.005664355 | 8       |
| ATP5E       | 3.68E-07 | 0.302194048 | 1     | 0.976 | 0.005765681 | 8       |
| MT-ND4L     | 3.72E-07 | 0.50603249  | 0.68  | 0.327 | 0.005823819 | 8       |
| HIGD2A      | 3.86E-07 | 0.474346902 | 0.76  | 0.447 | 0.006046175 | 8       |
| CCPG1       | 4.72E-07 | 0.316908688 | 0.26  | 0.069 | 0.007392702 | 8       |
| NAPA        | 4.74E-07 | 0.300086472 | 0.48  | 0.164 | 0.007425334 | 8       |
| LSP1        | 4.86E-07 | 0.468986388 | 0.94  | 0.675 | 0.007613708 | 8       |
| MT-CO3      | 5.15E-07 | 0.268293024 | 1     | 0.994 | 0.008071474 | 8       |
| NR1H2       | 5.86E-07 | 0.325862599 | 0.36  | 0.112 | 0.009190026 | 8       |
| ERICH1      | 6.66E-07 | 0.39075597  | 0.5   | 0.183 | 0.010437248 | 8       |
| HSD17B11    | 7.05E-07 | 0.389563247 | 0.62  | 0.247 | 0.011047114 | 8       |
| CTNBL1      | 9.51E-07 | 0.274591347 | 0.28  | 0.078 | 0.01490554  | 8       |
| IL10RB      | 9.60E-07 | 0.335273748 | 0.34  | 0.107 | 0.015052988 | 8       |
| UQCRC1      | 1.00E-06 | 0.364019716 | 0.44  | 0.156 | 0.015690696 | 8       |
| ARPC2       | 1.01E-06 | 0.372178801 | 0.98  | 0.802 | 0.015780264 | 8       |

Table S2 Continued

| Gene_marker | P_val    | Avg_logFC   | Pct.1 | Pct.2 | P_val_adj   | Cluster |
|-------------|----------|-------------|-------|-------|-------------|---------|
| HK1         | 1.12E-06 | 0.297172217 | 0.26  | 0.071 | 0.017523559 | 8       |
| EIF1        | 1.19E-06 | 0.258584735 | 1     | 0.994 | 0.018652705 | 8       |
| CDC42       | 1.23E-06 | 0.444075811 | 0.96  | 0.701 | 0.019263988 | 8       |
| CDKN2D      | 1.29E-06 | 0.286697323 | 0.44  | 0.152 | 0.0201724   | 8       |
| EIF6        | 1.32E-06 | 0.352733059 | 0.52  | 0.193 | 0.02068116  | 8       |
| REEP5       | 1.47E-06 | 0.463357098 | 0.56  | 0.251 | 0.023027649 | 8       |
| GSTP1       | 1.57E-06 | 0.473640039 | 0.86  | 0.528 | 0.02460639  | 8       |
| NDUFS6      | 1.73E-06 | 0.419145292 | 0.62  | 0.275 | 0.027101984 | 8       |
| CTSA        | 1.82E-06 | 0.277366408 | 0.36  | 0.117 | 0.028564087 | 8       |
| ALDOA       | 1.82E-06 | 0.459249235 | 0.88  | 0.678 | 0.028600927 | 8       |
| GNAI2       | 1.96E-06 | 0.330223223 | 0.46  | 0.168 | 0.030666462 | 8       |
| WDR83OS     | 2.10E-06 | 0.452455358 | 0.78  | 0.418 | 0.032877569 | 8       |
| TCEB2       | 2.17E-06 | 0.447471327 | 0.94  | 0.697 | 0.03406016  | 8       |
| YWHAE       | 2.26E-06 | 0.369717679 | 0.54  | 0.214 | 0.035443747 | 8       |
| ARRDC1      | 2.32E-06 | 0.32228957  | 0.42  | 0.15  | 0.036311874 | 8       |
| WAS         | 2.61E-06 | 0.367484162 | 0.62  | 0.257 | 0.040968047 | 8       |
| CHP1        | 2.71E-06 | 0.34123758  | 0.26  | 0.075 | 0.042467797 | 8       |
| IRF7        | 2.74E-06 | 0.373132483 | 0.34  | 0.114 | 0.042962784 | 8       |
| GLIPR1      | 2.89E-06 | 0.574582547 | 0.5   | 0.228 | 0.045289849 | 8       |
| HMG2        | 2.91E-06 | 0.400694789 | 0.94  | 0.668 | 0.045575251 | 8       |
| LRRFIP1     | 3.10E-06 | 0.405306638 | 0.74  | 0.361 | 0.048644854 | 8       |
| TMEM167A    | 3.42E-06 | 0.30604365  | 0.46  | 0.171 | 0.053599998 | 8       |
| GYG1        | 3.71E-06 | 0.32321792  | 0.38  | 0.132 | 0.058203913 | 8       |
| MAP3K11     | 3.76E-06 | 0.313376011 | 0.26  | 0.076 | 0.05893236  | 8       |
| PFKL        | 3.80E-06 | 0.271637075 | 0.4   | 0.138 | 0.059579762 | 8       |
| MIIP        | 3.85E-06 | 0.277751767 | 0.28  | 0.083 | 0.060404345 | 8       |
| SH3BGRL     | 3.90E-06 | 0.481678961 | 0.76  | 0.392 | 0.061074697 | 8       |
| ACAA1       | 4.27E-06 | 0.3533854   | 0.4   | 0.146 | 0.066914517 | 8       |
| AKR1A1      | 4.51E-06 | 0.29455062  | 0.42  | 0.152 | 0.070658525 | 8       |
| WASF2       | 4.54E-06 | 0.302702692 | 0.68  | 0.293 | 0.071121292 | 8       |

Table S2 Continued

| Gene_marker | P_val    | Avg_logFC   | Pct.1 | Pct.2 | P_val_adj   | Cluster |
|-------------|----------|-------------|-------|-------|-------------|---------|
| GNB2        | 4.61E-06 | 0.441092884 | 0.64  | 0.298 | 0.072283545 | 8       |
| MX2         | 5.40E-06 | 0.253489258 | 0.26  | 0.075 | 0.084681609 | 8       |
| NARS        | 5.42E-06 | 0.250219741 | 0.36  | 0.12  | 0.084984017 | 8       |
| ACTR2       | 6.13E-06 | 0.336514128 | 0.74  | 0.335 | 0.096123203 | 8       |
| SQRDL       | 6.20E-06 | 0.349023225 | 0.34  | 0.114 | 0.097122537 | 8       |
| C1orf122    | 6.55E-06 | 0.254257165 | 0.3   | 0.094 | 0.102607867 | 8       |
| ITGB2-AS1   | 7.00E-06 | 0.272275489 | 0.4   | 0.142 | 0.109680085 | 8       |
| DNAJA1      | 7.11E-06 | 0.313132062 | 0.56  | 0.223 | 0.111415384 | 8       |
| COX5A       | 7.25E-06 | 0.362208853 | 0.68  | 0.332 | 0.113636772 | 8       |
| PSME2       | 7.45E-06 | 0.412637388 | 0.88  | 0.587 | 0.116786398 | 8       |
| FAM32A      | 7.91E-06 | 0.325413254 | 0.42  | 0.156 | 0.124062643 | 8       |
| POMP        | 8.12E-06 | 0.510358854 | 0.74  | 0.446 | 0.127324994 | 8       |
| RTN4        | 8.83E-06 | 0.330529582 | 0.64  | 0.289 | 0.138397503 | 8       |
| LAMTOR2     | 9.07E-06 | 0.356374746 | 0.54  | 0.225 | 0.142119552 | 8       |
| ZFAS1       | 9.58E-06 | 0.34724812  | 0.82  | 0.42  | 0.150213113 | 8       |
| USP15       | 9.65E-06 | 0.357312722 | 0.44  | 0.173 | 0.15121291  | 8       |
| LY6E        | 9.68E-06 | 0.457169336 | 0.9   | 0.619 | 0.151698086 | 8       |
| CD37        | 9.70E-06 | 0.334829898 | 1     | 0.726 | 0.152099796 | 8       |
| RPS27L      | 1.06E-05 | 0.505677003 | 0.8   | 0.458 | 0.166483303 | 8       |
| PFDN5       | 1.15E-05 | 0.280519679 | 1     | 0.96  | 0.17953964  | 8       |
| PABPC1      | 1.16E-05 | 0.293106958 | 0.98  | 0.908 | 0.181447949 | 8       |
| CCT5        | 1.16E-05 | 0.361714599 | 0.34  | 0.121 | 0.181638161 | 8       |
| PRDX3       | 1.16E-05 | 0.273051395 | 0.38  | 0.137 | 0.182047916 | 8       |
| JUNB        | 1.20E-05 | 0.48362366  | 0.94  | 0.729 | 0.187514949 | 8       |
| PGAM1       | 1.22E-05 | 0.330885833 | 0.64  | 0.295 | 0.191181598 | 8       |
| ATP5G2      | 1.30E-05 | 0.395291678 | 0.96  | 0.788 | 0.203429195 | 8       |
| MPC1        | 1.37E-05 | 0.313469802 | 0.3   | 0.1   | 0.215515333 | 8       |
| RAB5C       | 1.44E-05 | 0.393616135 | 0.62  | 0.292 | 0.226326705 | 8       |
| AKIRIN2     | 1.50E-05 | 0.288689274 | 0.32  | 0.109 | 0.235243945 | 8       |
| VPS28       | 1.52E-05 | 0.341178254 | 0.72  | 0.336 | 0.237958921 | 8       |

Table S2 Continued

| Gene_marker | P_val    | Avg_logFC   | Pct.1 | Pct.2 | P_val_adj   | Cluster |
|-------------|----------|-------------|-------|-------|-------------|---------|
| CALHM2      | 1.73E-05 | 0.267844476 | 0.26  | 0.08  | 0.271762026 | 8       |
| FXYD5       | 1.88E-05 | 0.313997888 | 0.96  | 0.603 | 0.295173744 | 8       |
| TMBIM4      | 1.99E-05 | 0.391267896 | 0.7   | 0.366 | 0.312107062 | 8       |
| S100A10     | 2.00E-05 | 0.402000605 | 0.92  | 0.597 | 0.31387085  | 8       |
| C7orf50     | 2.02E-05 | 0.326333334 | 0.44  | 0.174 | 0.316644633 | 8       |
| FBXL5       | 2.12E-05 | 0.362462934 | 0.32  | 0.115 | 0.332626943 | 8       |
| MT-ND2      | 2.33E-05 | 0.274847628 | 1     | 0.98  | 0.365216166 | 8       |
| GPR155      | 2.41E-05 | 0.267860033 | 0.26  | 0.082 | 0.377889906 | 8       |
| NCOA4       | 2.49E-05 | 0.290211264 | 0.36  | 0.132 | 0.39104019  | 8       |
| ADI1        | 2.52E-05 | 0.322068887 | 0.32  | 0.116 | 0.395294366 | 8       |
| CHMP5       | 2.73E-05 | 0.258428864 | 0.46  | 0.183 | 0.427741158 | 8       |
| NAA38       | 2.90E-05 | 0.308193244 | 0.68  | 0.32  | 0.455307412 | 8       |
| H2AFZ       | 2.98E-05 | 0.441648599 | 0.78  | 0.479 | 0.467491042 | 8       |
| MRPL23      | 3.00E-05 | 0.264224746 | 0.38  | 0.143 | 0.470635202 | 8       |
| MAP2K3      | 3.09E-05 | 0.280915173 | 0.3   | 0.102 | 0.484634054 | 8       |
| TIMM8B      | 3.17E-05 | 0.319218658 | 0.38  | 0.149 | 0.496569801 | 8       |
| C1orf43     | 3.23E-05 | 0.27227352  | 0.44  | 0.176 | 0.507024368 | 8       |
| POLR1D      | 3.37E-05 | 0.255393895 | 0.58  | 0.246 | 0.528383863 | 8       |
| ADGRE5      | 3.42E-05 | 0.413562115 | 0.42  | 0.179 | 0.536758477 | 8       |
| CFL1        | 3.45E-05 | 0.256717833 | 1     | 0.961 | 0.540863646 | 8       |
| SUPT4H1     | 3.50E-05 | 0.410975038 | 0.58  | 0.272 | 0.548527171 | 8       |
| ATP5J2      | 3.54E-05 | 0.420392622 | 0.82  | 0.555 | 0.554847953 | 8       |
| KLF3        | 4.07E-05 | 0.298772565 | 0.3   | 0.106 | 0.637836783 | 8       |
| SERPINB1    | 4.38E-05 | 0.251212776 | 0.52  | 0.217 | 0.687179192 | 8       |
| PSMB10      | 4.39E-05 | 0.312172591 | 0.54  | 0.241 | 0.688701086 | 8       |
| FAM192A     | 4.40E-05 | 0.263939094 | 0.36  | 0.135 | 0.689051251 | 8       |
| YWHAH       | 4.50E-05 | 0.353773624 | 0.44  | 0.184 | 0.705221206 | 8       |
| ATP5C1      | 4.50E-05 | 0.364131122 | 0.64  | 0.301 | 0.706142489 | 8       |
| SLC25A5     | 4.89E-05 | 0.453078452 | 0.64  | 0.339 | 0.766384085 | 8       |
| NDUFS7      | 5.45E-05 | 0.264564581 | 0.68  | 0.31  | 0.854928073 | 8       |

Table S2 Continued

| Gene_marker   | P_val       | Avg_logFC   | Pct.1 | Pct.2 | P_val_adj   | Cluster |
|---------------|-------------|-------------|-------|-------|-------------|---------|
| PRR13         | 5.88E-05    | 0.331119572 | 0.88  | 0.577 | 0.922060336 | 8       |
| DNASE2        | 6.03E-05    | 0.301736536 | 0.32  | 0.119 | 0.945872163 | 8       |
| COX6B1        | 6.35E-05    | 0.357823002 | 0.96  | 0.682 | 0.995387771 | 8       |
| NDUFAF3       | 6.59E-05    | 0.369959409 | 0.46  | 0.217 | 1           | 8       |
| EMP3          | 6.73E-05    | 0.347854347 | 0.9   | 0.688 | 1           | 8       |
| PPDPF         | 7.16E-05    | 0.322885234 | 0.88  | 0.595 | 1           | 8       |
| CD44          | 7.49E-05    | 0.286129179 | 0.78  | 0.417 | 1           | 8       |
| IQGAP1        | 7.64E-05    | 0.349773646 | 0.54  | 0.244 | 1           | 8       |
| C4orf48       | 8.06E-05    | 0.330082511 | 0.54  | 0.247 | 1           | 8       |
| PSMB9         | 8.11E-05    | 0.342212918 | 0.9   | 0.685 | 1           | 8       |
| C14orf2       | 8.20E-05    | 0.316889911 | 0.94  | 0.73  | 1           | 8       |
| DYNLL1        | 8.54E-05    | 0.417596101 | 0.76  | 0.434 | 1           | 8       |
| VPS35         | 8.59E-05    | 0.315973115 | 0.34  | 0.133 | 1           | 8       |
| SEC11A        | 8.60E-05    | 0.364599067 | 0.62  | 0.313 | 1           | 8       |
| PSMB3         | 9.08E-05    | 0.309125253 | 0.74  | 0.423 | 1           | 8       |
| NDUFB5        | 9.33E-05    | 0.275952616 | 0.52  | 0.234 | 1           | 8       |
| COX7B         | 9.42E-05    | 0.334397412 | 0.8   | 0.442 | 1           | 8       |
| ATP5L         | 9.77E-05    | 0.288455544 | 0.98  | 0.85  | 1           | 8       |
| ATP1A1        | 0.00011633  | 0.355989209 | 0.46  | 0.212 | 1           | 8       |
| RP5-1171I10.5 | 0.000116991 | 0.329658227 | 0.58  | 0.302 | 1           | 8       |
| MRPS18C       | 0.000124826 | 0.271802772 | 0.38  | 0.156 | 1           | 8       |
| NDUFA6        | 0.00012818  | 0.331229882 | 0.56  | 0.275 | 1           | 8       |
| DYNLT1        | 0.000132233 | 0.281717981 | 0.42  | 0.18  | 1           | 8       |
| DDX21         | 0.000140198 | 0.268851312 | 0.44  | 0.19  | 1           | 8       |
| HLA-B         | 0.000150099 | 0.253637499 | 1     | 0.911 | 1           | 8       |
| VTI1B         | 0.000165005 | 0.276279214 | 0.36  | 0.147 | 1           | 8       |
| VMA21         | 0.000165175 | 0.260104798 | 0.28  | 0.103 | 1           | 8       |
| PDCD6IP       | 0.000184123 | 0.25016734  | 0.26  | 0.093 | 1           | 8       |
| CAPZA1        | 0.000198288 | 0.417556491 | 0.7   | 0.382 | 1           | 8       |
| ERGIC3        | 0.000206932 | 0.278781973 | 0.56  | 0.272 | 1           | 8       |

Table S2 Continued

| Gene_marker | P_val       | Avg_logFC   | Pct.1 | Pct.2 | P_val_adj | Cluster |
|-------------|-------------|-------------|-------|-------|-----------|---------|
| AURKAIP1    | 0.000218149 | 0.294256665 | 0.6   | 0.307 | 1         | 8       |
| IRF1        | 0.000227986 | 0.336164766 | 0.68  | 0.392 | 1         | 8       |
| ATP6AP2     | 0.000230337 | 0.336423514 | 0.58  | 0.286 | 1         | 8       |
| VAPA        | 0.000232365 | 0.282650652 | 0.68  | 0.333 | 1         | 8       |
| HLA-DQB1    | 0.000234346 | 0.276119946 | 0.58  | 0.284 | 1         | 8       |
| M6PR        | 0.00024382  | 0.267506884 | 0.58  | 0.281 | 1         | 8       |
| LRPAP1      | 0.000244509 | 0.304636658 | 0.44  | 0.194 | 1         | 8       |
| IRF2        | 0.000256783 | 0.281671628 | 0.36  | 0.153 | 1         | 8       |
| GPX4        | 0.00025765  | 0.277974551 | 0.78  | 0.406 | 1         | 8       |
| TMEM179B    | 0.000280817 | 0.337451397 | 0.4   | 0.178 | 1         | 8       |
| EIF1B       | 0.000306579 | 0.325769727 | 0.52  | 0.261 | 1         | 8       |
| MYO1G       | 0.00031896  | 0.373304868 | 0.64  | 0.341 | 1         | 8       |
| DBNL        | 0.000345286 | 0.267135144 | 0.54  | 0.255 | 1         | 8       |
| CYTIP       | 0.00034864  | 0.273477404 | 0.46  | 0.216 | 1         | 8       |
| MINOS1      | 0.000363874 | 0.298198734 | 0.68  | 0.351 | 1         | 8       |
| RHOA        | 0.00038178  | 0.346325232 | 0.82  | 0.54  | 1         | 8       |
| RAP1B       | 0.000399521 | 0.25321701  | 0.88  | 0.518 | 1         | 8       |
| CSK         | 0.00041578  | 0.257916881 | 0.56  | 0.265 | 1         | 8       |
| COX7A2      | 0.00042972  | 0.290370052 | 0.96  | 0.69  | 1         | 8       |
| KDEL2       | 0.0004676   | 0.250586821 | 0.42  | 0.194 | 1         | 8       |
| COX17       | 0.000482971 | 0.299971916 | 0.6   | 0.317 | 1         | 8       |
| MRPL27      | 0.00050383  | 0.261837892 | 0.26  | 0.101 | 1         | 8       |
| CAP1        | 0.000620654 | 0.293097026 | 0.76  | 0.512 | 1         | 8       |
| TMEM165     | 0.000638287 | 0.250488929 | 0.44  | 0.205 | 1         | 8       |
| NFKBIA      | 0.000705637 | 0.472810165 | 0.4   | 0.2   | 1         | 8       |
| PRDX1       | 0.000729282 | 0.28096065  | 0.6   | 0.329 | 1         | 8       |
| CLIC1       | 0.001102871 | 0.286309982 | 0.92  | 0.67  | 1         | 8       |
| ATP5J       | 0.001228671 | 0.263566312 | 0.78  | 0.454 | 1         | 8       |
| MGST3       | 0.001353256 | 0.266436576 | 0.42  | 0.2   | 1         | 8       |
| DAZAP2      | 0.001531941 | 0.262128038 | 0.9   | 0.602 | 1         | 8       |

Table S2 Continued

| Gene_marker | P_val       | Avg_logFC   | Pct.1 | Pct.2 | P_val_adj | Cluster |
|-------------|-------------|-------------|-------|-------|-----------|---------|
| COX6A1      | 0.002580698 | 0.279757106 | 0.84  | 0.591 | 1         | 8       |
| ABRACL      | 0.003088824 | 0.296515455 | 0.72  | 0.415 | 1         | 8       |
| ARL6IP4     | 0.005859661 | 0.257631282 | 0.74  | 0.484 | 1         | 8       |
| USMG5       | 0.005893312 | 0.285060757 | 0.82  | 0.57  | 1         | 8       |
| PTGES3      | 0.006795499 | 0.265015246 | 0.7   | 0.432 | 1         | 8       |
| IFI35       | 0.007688743 | 0.258712416 | 0.28  | 0.137 | 1         | 8       |
| ATP5G3      | 0.007972003 | 0.255634846 | 0.68  | 0.435 | 1         | 8       |
| CPNE5       | 5.14E-126   | 1.405203589 | 0.6   | 0.016 | 8.05E-122 | 9       |
| CD86        | 4.29E-92    | 0.864319519 | 0.457 | 0.013 | 6.72E-88  | 9       |
| GNG7        | 1.80E-88    | 1.191470838 | 0.543 | 0.02  | 2.82E-84  | 9       |
| AL928768.3  | 7.83E-84    | 2.16565284  | 0.457 | 0.015 | 1.23E-79  | 9       |
| SSPN        | 6.56E-77    | 0.670458385 | 0.257 | 0.004 | 1.03E-72  | 9       |
| KYNU        | 6.68E-63    | 0.64783338  | 0.343 | 0.011 | 1.05E-58  | 9       |
| MEF2C       | 1.47E-61    | 1.437322381 | 0.8   | 0.07  | 2.31E-57  | 9       |
| PPP1R14A    | 1.15E-57    | 1.047148138 | 0.4   | 0.017 | 1.80E-53  | 9       |
| BLK         | 3.31E-55    | 1.017677452 | 0.714 | 0.057 | 5.19E-51  | 9       |
| FCER2       | 2.34E-50    | 0.714626556 | 0.286 | 0.01  | 3.67E-46  | 9       |
| ZBTB32      | 7.21E-50    | 0.547690448 | 0.314 | 0.012 | 1.13E-45  | 9       |
| ANXA4       | 1.55E-47    | 0.92045491  | 0.629 | 0.051 | 2.42E-43  | 9       |
| KIAA0125    | 2.13E-47    | 0.902316085 | 0.343 | 0.015 | 3.34E-43  | 9       |
| SCIMP       | 8.43E-43    | 0.722925898 | 0.371 | 0.02  | 1.32E-38  | 9       |
| HVCN1       | 1.33E-41    | 0.853639775 | 0.457 | 0.032 | 2.08E-37  | 9       |
| HCK         | 1.83E-41    | 0.496442489 | 0.286 | 0.012 | 2.87E-37  | 9       |
| EAF2        | 2.08E-41    | 0.957141558 | 0.4   | 0.025 | 3.27E-37  | 9       |
| IRF8        | 7.64E-41    | 0.78886217  | 0.543 | 0.044 | 1.20E-36  | 9       |
| HHEX        | 8.35E-41    | 0.624520711 | 0.4   | 0.024 | 1.31E-36  | 9       |
| KLK1        | 1.98E-38    | 0.588547725 | 0.286 | 0.013 | 3.11E-34  | 9       |
| GAPT        | 1.27E-36    | 0.789682934 | 0.486 | 0.04  | 2.00E-32  | 9       |
| FGD2        | 9.57E-36    | 0.489593271 | 0.286 | 0.014 | 1.50E-31  | 9       |
| SCPEP1      | 3.20E-34    | 0.836042615 | 0.4   | 0.03  | 5.02E-30  | 9       |

Table S2 Continued

| Gene_marker | P_val    | Avg_logFC   | Pct.1 | Pct.2 | P_val_adj | Cluster |
|-------------|----------|-------------|-------|-------|-----------|---------|
| TNFRSF13B   | 1.53E-33 | 0.793599689 | 0.429 | 0.035 | 2.39E-29  | 9       |
| RASGRP3     | 1.80E-33 | 0.528065309 | 0.257 | 0.012 | 2.82E-29  | 9       |
| CLECL1      | 8.34E-32 | 0.899005362 | 0.8   | 0.116 | 1.31E-27  | 9       |
| EBF1        | 2.17E-30 | 0.57083391  | 0.286 | 0.017 | 3.40E-26  | 9       |
| BANK1       | 4.76E-30 | 1.145762049 | 0.629 | 0.085 | 7.47E-26  | 9       |
| CXCR5       | 3.42E-29 | 0.454981513 | 0.314 | 0.021 | 5.36E-25  | 9       |
| LAT2        | 1.01E-27 | 0.960048803 | 0.571 | 0.075 | 1.58E-23  | 9       |
| AIM2        | 2.23E-27 | 0.608543491 | 0.371 | 0.032 | 3.50E-23  | 9       |
| SPIB        | 1.14E-26 | 0.920681384 | 0.571 | 0.075 | 1.79E-22  | 9       |
| ARID3A      | 2.23E-26 | 0.674960049 | 0.4   | 0.038 | 3.49E-22  | 9       |
| CCDC50      | 8.20E-26 | 0.872589033 | 0.629 | 0.092 | 1.29E-21  | 9       |
| UBE2J1      | 4.83E-25 | 1.035181246 | 0.714 | 0.131 | 7.58E-21  | 9       |
| CD79A       | 9.07E-25 | 1.377298675 | 0.971 | 0.267 | 1.42E-20  | 9       |
| DUS2        | 9.93E-25 | 0.410940055 | 0.286 | 0.021 | 1.56E-20  | 9       |
| CD180       | 6.15E-24 | 0.454076658 | 0.257 | 0.018 | 9.64E-20  | 9       |
| HLA-DRA     | 5.53E-23 | 1.802287676 | 1     | 0.616 | 8.68E-19  | 9       |
| POU2AF1     | 9.29E-23 | 0.776395057 | 0.4   | 0.044 | 1.46E-18  | 9       |
| CYBB        | 1.90E-22 | 0.6523017   | 0.343 | 0.033 | 2.98E-18  | 9       |
| POU2F2      | 2.02E-22 | 0.902221275 | 0.743 | 0.144 | 3.16E-18  | 9       |
| HLA-DMB     | 3.08E-22 | 1.038590087 | 0.8   | 0.167 | 4.82E-18  | 9       |
| SYK         | 1.57E-21 | 0.706988595 | 0.371 | 0.04  | 2.46E-17  | 9       |
| CD74        | 3.43E-21 | 1.523332208 | 1     | 0.938 | 5.38E-17  | 9       |
| MS4A1       | 7.41E-21 | 1.193373882 | 0.914 | 0.249 | 1.16E-16  | 9       |
| HLA-DOB     | 7.83E-21 | 0.706885332 | 0.429 | 0.055 | 1.23E-16  | 9       |
| SPI1        | 1.03E-20 | 0.639972395 | 0.371 | 0.042 | 1.62E-16  | 9       |
| CD19        | 1.13E-20 | 0.965030779 | 0.629 | 0.115 | 1.77E-16  | 9       |
| SNX2        | 2.91E-20 | 0.927191253 | 0.6   | 0.108 | 4.56E-16  | 9       |
| SH2B2       | 7.69E-20 | 0.546019246 | 0.314 | 0.031 | 1.20E-15  | 9       |
| CAPG        | 1.35E-19 | 0.923215012 | 0.6   | 0.112 | 2.11E-15  | 9       |
| HLA-DPB1    | 2.63E-19 | 1.290823725 | 1     | 0.779 | 4.12E-15  | 9       |



Table S2 Continued

| Gene_marker | P_val    | Avg_logFC   | Pct.1 | Pct.2 | P_val_adj | Cluster |
|-------------|----------|-------------|-------|-------|-----------|---------|
| CTSH        | 6.72E-19 | 0.643961283 | 0.514 | 0.08  | 1.05E-14  | 9       |
| TLE1        | 7.48E-19 | 0.386278033 | 0.286 | 0.027 | 1.17E-14  | 9       |
| CD79B       | 3.72E-18 | 0.993824382 | 0.971 | 0.31  | 5.83E-14  | 9       |
| SND1        | 6.34E-18 | 0.789407235 | 0.514 | 0.088 | 9.94E-14  | 9       |
| LY86        | 7.34E-18 | 0.901869535 | 0.543 | 0.098 | 1.15E-13  | 9       |
| JCHAIN      | 8.42E-18 | 0.972853389 | 0.571 | 0.121 | 1.32E-13  | 9       |
| DAPP1       | 1.53E-17 | 0.708209332 | 0.4   | 0.056 | 2.39E-13  | 9       |
| HLA-DQB1    | 1.58E-17 | 1.135912876 | 0.857 | 0.283 | 2.47E-13  | 9       |
| TMEM156     | 4.98E-17 | 0.87343292  | 0.457 | 0.076 | 7.81E-13  | 9       |
| HLA-DQA2    | 5.42E-17 | 1.095393741 | 0.943 | 0.384 | 8.50E-13  | 9       |
| GCSAM       | 9.04E-17 | 0.554889575 | 0.286 | 0.031 | 1.42E-12  | 9       |
| PNOC        | 3.08E-16 | 0.457719245 | 0.286 | 0.032 | 4.82E-12  | 9       |
| NCF4        | 1.08E-15 | 0.549269113 | 0.457 | 0.076 | 1.69E-11  | 9       |
| IFT57       | 1.09E-15 | 0.629799275 | 0.429 | 0.069 | 1.70E-11  | 9       |
| FCGR2B      | 1.83E-15 | 0.608301447 | 0.343 | 0.048 | 2.86E-11  | 9       |
| HLA-DPA1    | 1.89E-15 | 1.180582682 | 0.971 | 0.682 | 2.97E-11  | 9       |
| TBC1D22A    | 3.61E-15 | 0.481449916 | 0.371 | 0.053 | 5.66E-11  | 9       |
| DAAM1       | 3.97E-15 | 0.413147432 | 0.286 | 0.033 | 6.23E-11  | 9       |
| BTK         | 6.89E-15 | 0.584455401 | 0.429 | 0.073 | 1.08E-10  | 9       |
| PXK         | 1.77E-14 | 0.502720181 | 0.314 | 0.042 | 2.78E-10  | 9       |
| HLA-DQA1    | 3.41E-14 | 0.970303743 | 0.829 | 0.291 | 5.35E-10  | 9       |
| SIGLEC10    | 4.43E-14 | 0.413606975 | 0.257 | 0.03  | 6.94E-10  | 9       |
| HSPA4       | 6.09E-14 | 0.632973373 | 0.371 | 0.059 | 9.55E-10  | 9       |
| HLA-DOA     | 8.64E-14 | 0.406731405 | 0.257 | 0.03  | 1.35E-09  | 9       |
| PKIG        | 2.29E-13 | 0.407194974 | 0.257 | 0.031 | 3.59E-09  | 9       |
| GUCD1       | 2.41E-13 | 0.609389708 | 0.343 | 0.054 | 3.79E-09  | 9       |
| IGKC        | 5.80E-13 | 0.448295928 | 1     | 0.995 | 9.09E-09  | 9       |
| TCF4        | 6.26E-13 | 0.815397135 | 0.429 | 0.085 | 9.82E-09  | 9       |
| CYSLTR1     | 1.02E-12 | 0.494040947 | 0.371 | 0.062 | 1.60E-08  | 9       |
| SUB1        | 1.35E-12 | 1.020298531 | 0.971 | 0.703 | 2.12E-08  | 9       |

Table S2 Continued

| Gene_marker | P_val    | Avg_logFC   | Pct.1 | Pct.2 | P_val_adj | Cluster |
|-------------|----------|-------------|-------|-------|-----------|---------|
| TKT         | 2.00E-12 | 0.737284673 | 0.629 | 0.163 | 3.14E-08  | 9       |
| ACP5        | 2.81E-12 | 0.687687046 | 0.571 | 0.144 | 4.40E-08  | 9       |
| PLAC8       | 3.01E-12 | 1.043250572 | 0.657 | 0.197 | 4.72E-08  | 9       |
| P2RX5       | 3.63E-12 | 0.631255548 | 0.4   | 0.075 | 5.69E-08  | 9       |
| LAPTM5      | 8.15E-12 | 0.950190236 | 0.943 | 0.706 | 1.28E-07  | 9       |
| HLA-DMA     | 1.18E-11 | 0.815836231 | 0.8   | 0.299 | 1.85E-07  | 9       |
| HLA-DRB1    | 1.20E-11 | 0.89917861  | 1     | 0.656 | 1.88E-07  | 9       |
| PAX5        | 1.30E-11 | 0.444380729 | 0.257 | 0.036 | 2.03E-07  | 9       |
| GABARAPL2   | 1.66E-11 | 0.745667136 | 0.886 | 0.369 | 2.60E-07  | 9       |
| PDLIM1      | 2.19E-11 | 0.558123126 | 0.571 | 0.141 | 3.43E-07  | 9       |
| TMEM154     | 5.18E-11 | 0.610711136 | 0.457 | 0.104 | 8.12E-07  | 9       |
| LYN         | 6.60E-11 | 0.436064232 | 0.4   | 0.08  | 1.03E-06  | 9       |
| CYB561A3    | 9.86E-11 | 0.595869122 | 0.514 | 0.13  | 1.55E-06  | 9       |
| SEL1L3      | 9.87E-11 | 0.521447806 | 0.371 | 0.074 | 1.55E-06  | 9       |
| SNX3        | 1.17E-10 | 0.864487117 | 0.886 | 0.456 | 1.83E-06  | 9       |
| MARCH1      | 1.19E-10 | 0.581421762 | 0.4   | 0.084 | 1.87E-06  | 9       |
| DNAJC10     | 1.29E-10 | 0.434092933 | 0.4   | 0.081 | 2.02E-06  | 9       |
| MRPS18A     | 1.40E-10 | 0.397326275 | 0.371 | 0.072 | 2.19E-06  | 9       |
| SYNGR2      | 1.46E-10 | 0.611715231 | 0.686 | 0.204 | 2.28E-06  | 9       |
| STX7        | 1.90E-10 | 0.71295084  | 0.514 | 0.136 | 2.97E-06  | 9       |
| FCRLA       | 2.05E-10 | 0.682572368 | 0.343 | 0.067 | 3.21E-06  | 9       |
| PLPP5       | 2.44E-10 | 0.515389073 | 0.429 | 0.095 | 3.82E-06  | 9       |
| PLEKHO1     | 2.46E-10 | 0.582038532 | 0.314 | 0.058 | 3.86E-06  | 9       |
| CD37        | 2.52E-10 | 0.731690298 | 1     | 0.727 | 3.96E-06  | 9       |
| BCAS4       | 5.70E-10 | 0.661068887 | 0.457 | 0.11  | 8.94E-06  | 9       |
| RPLP1       | 6.78E-10 | 0.373029247 | 1     | 1     | 1.06E-05  | 9       |
| OAZ1        | 7.59E-10 | 0.577225947 | 1     | 0.901 | 1.19E-05  | 9       |
| PLCG2       | 9.73E-10 | 0.467776618 | 0.286 | 0.051 | 1.53E-05  | 9       |
| LYPLAL1     | 1.03E-09 | 0.499785578 | 0.257 | 0.042 | 1.62E-05  | 9       |
| LINC00936   | 1.17E-09 | 0.585223287 | 0.4   | 0.091 | 1.83E-05  | 9       |

Table S2 Continued

| Gene_marker | P_val    | Avg_logFC   | Pct.1 | Pct.2 | P_val_adj   | Cluster |
|-------------|----------|-------------|-------|-------|-------------|---------|
| CD22        | 1.25E-09 | 0.507264982 | 0.286 | 0.051 | 1.96E-05    | 9       |
| KCNN4       | 1.56E-09 | 0.374819217 | 0.314 | 0.059 | 2.45E-05    | 9       |
| ZFAND6      | 1.72E-09 | 0.656343756 | 0.714 | 0.236 | 2.70E-05    | 9       |
| ADK         | 2.37E-09 | 0.576045765 | 0.286 | 0.053 | 3.71E-05    | 9       |
| CAMK1D      | 2.98E-09 | 0.291832173 | 0.257 | 0.042 | 4.67E-05    | 9       |
| CHD7        | 3.25E-09 | 0.288558396 | 0.286 | 0.051 | 5.09E-05    | 9       |
| FAM26F      | 3.33E-09 | 0.352383128 | 0.257 | 0.044 | 5.22E-05    | 9       |
| CTSZ        | 5.19E-09 | 0.506075488 | 0.286 | 0.055 | 8.13E-05    | 9       |
| SP140       | 6.45E-09 | 0.489362787 | 0.457 | 0.119 | 0.000101138 | 9       |
| SPINT2      | 1.30E-08 | 0.631937909 | 0.371 | 0.091 | 0.000203091 | 9       |
| DRAM2       | 1.30E-08 | 0.587165837 | 0.6   | 0.187 | 0.000203779 | 9       |
| PPA1        | 1.30E-08 | 0.505487327 | 0.6   | 0.184 | 0.000203969 | 9       |
| EEF2        | 1.73E-08 | 0.522022166 | 1     | 0.892 | 0.000271479 | 9       |
| GNB2L1      | 2.20E-08 | 0.420458952 | 1     | 0.983 | 0.000344699 | 9       |
| CD82        | 2.40E-08 | 0.59956749  | 0.514 | 0.153 | 0.000376282 | 9       |
| ORAI2       | 2.42E-08 | 0.473406651 | 0.514 | 0.145 | 0.000379534 | 9       |
| CDCA7L      | 3.33E-08 | 0.313310049 | 0.286 | 0.056 | 0.000521362 | 9       |
| UVRAG       | 3.33E-08 | 0.330513654 | 0.257 | 0.048 | 0.000521751 | 9       |
| BORCS5      | 3.83E-08 | 0.32697772  | 0.257 | 0.048 | 0.00060045  | 9       |
| NANS        | 5.39E-08 | 0.411486327 | 0.257 | 0.051 | 0.000844796 | 9       |
| ITGAE       | 9.05E-08 | 0.471918721 | 0.429 | 0.117 | 0.001417957 | 9       |
| RABEP2      | 1.43E-07 | 0.470562824 | 0.286 | 0.062 | 0.002239069 | 9       |
| SMIM14      | 1.75E-07 | 0.644983543 | 0.543 | 0.183 | 0.002748747 | 9       |
| MTSS1       | 2.59E-07 | 0.428618623 | 0.286 | 0.064 | 0.00405765  | 9       |
| TNFRSF13C   | 2.80E-07 | 0.378259419 | 0.457 | 0.132 | 0.004391649 | 9       |
| MT-CO3      | 3.53E-07 | 0.410602597 | 1     | 0.994 | 0.005530943 | 9       |
| AP1S2       | 3.76E-07 | 0.477369096 | 0.514 | 0.165 | 0.005901338 | 9       |
| ASAH1       | 3.96E-07 | 0.421197082 | 0.429 | 0.122 | 0.00620383  | 9       |
| CCDC167     | 4.08E-07 | 0.515412179 | 0.486 | 0.154 | 0.006394154 | 9       |
| CALM2       | 4.43E-07 | 0.543555456 | 1     | 0.714 | 0.006948408 | 9       |

Table S2 Continued

| Gene_marker | P_val    | Avg_logFC   | Pct.1 | Pct.2 | P_val_adj   | Cluster |
|-------------|----------|-------------|-------|-------|-------------|---------|
| GRHPR       | 4.47E-07 | 0.507805889 | 0.4   | 0.115 | 0.007010947 | 9       |
| LYL1        | 5.55E-07 | 0.314262943 | 0.286 | 0.064 | 0.008696652 | 9       |
| UBE2N       | 5.77E-07 | 0.640167862 | 0.686 | 0.3   | 0.009039783 | 9       |
| GPX1        | 6.88E-07 | 0.532845191 | 0.743 | 0.326 | 0.010781581 | 9       |
| GRINA       | 7.62E-07 | 0.337222947 | 0.257 | 0.056 | 0.01194402  | 9       |
| TFEB        | 8.34E-07 | 0.306637936 | 0.257 | 0.055 | 0.013080496 | 9       |
| MTPN        | 8.72E-07 | 0.414364935 | 0.486 | 0.15  | 0.013663728 | 9       |
| CMTR2       | 1.11E-06 | 0.285149969 | 0.286 | 0.066 | 0.017471408 | 9       |
| MRPL40      | 1.19E-06 | 0.47334008  | 0.343 | 0.092 | 0.018731055 | 9       |
| BLNK        | 1.43E-06 | 0.359736991 | 0.314 | 0.08  | 0.022354154 | 9       |
| LSP1        | 1.43E-06 | 0.542944301 | 0.914 | 0.676 | 0.022369248 | 9       |
| ANKRD13A    | 1.45E-06 | 0.326154928 | 0.314 | 0.078 | 0.022697978 | 9       |
| PARP1       | 1.48E-06 | 0.526846533 | 0.6   | 0.238 | 0.023259653 | 9       |
| MT-CO1      | 1.49E-06 | 0.33774151  | 1     | 0.998 | 0.023299704 | 9       |
| ATP2B1      | 1.54E-06 | 0.504257472 | 0.4   | 0.124 | 0.024202094 | 9       |
| ODC1        | 1.58E-06 | 0.340621664 | 0.429 | 0.126 | 0.024726348 | 9       |
| TAF9        | 1.60E-06 | 0.423684559 | 0.457 | 0.143 | 0.025106032 | 9       |
| NCR3        | 1.68E-06 | 0.321012925 | 0.257 | 0.057 | 0.026357496 | 9       |
| DBNL        | 1.74E-06 | 0.5828485   | 0.657 | 0.255 | 0.027220777 | 9       |
| SYPL1       | 1.86E-06 | 0.4942558   | 0.457 | 0.15  | 0.029215443 | 9       |
| SKAP2       | 2.07E-06 | 0.320685337 | 0.286 | 0.069 | 0.032407802 | 9       |
| PABPC4      | 2.14E-06 | 0.526814998 | 0.457 | 0.155 | 0.033617116 | 9       |
| IDI1        | 2.24E-06 | 0.341128525 | 0.486 | 0.152 | 0.035125303 | 9       |
| CRIP1       | 2.31E-06 | 0.937604584 | 0.886 | 0.56  | 0.036243566 | 9       |
| SNRNP25     | 2.32E-06 | 0.328106844 | 0.286 | 0.069 | 0.036323748 | 9       |
| OAS1        | 2.32E-06 | 0.295441171 | 0.286 | 0.069 | 0.036382887 | 9       |
| NOB1        | 3.19E-06 | 0.302818204 | 0.343 | 0.092 | 0.05006747  | 9       |
| CAPN1       | 3.41E-06 | 0.379538792 | 0.429 | 0.133 | 0.053419979 | 9       |
| IRF7        | 3.47E-06 | 0.651262423 | 0.371 | 0.114 | 0.054443502 | 9       |
| SMAGP       | 3.49E-06 | 0.302956414 | 0.314 | 0.081 | 0.054729607 | 9       |

Table S2 Continued

| Gene_marker | P_val    | Avg_logFC   | Pct.1 | Pct.2 | P_val_adj   | Cluster |
|-------------|----------|-------------|-------|-------|-------------|---------|
| CYB5R3      | 3.75E-06 | 0.365041348 | 0.343 | 0.095 | 0.05878333  | 9       |
| SWAP70      | 4.16E-06 | 0.36451882  | 0.257 | 0.062 | 0.065207761 | 9       |
| NAP1L1      | 4.31E-06 | 0.649465155 | 0.829 | 0.578 | 0.067500729 | 9       |
| ARHGAP27    | 4.35E-06 | 0.296354312 | 0.257 | 0.061 | 0.068154169 | 9       |
| LMO4        | 4.44E-06 | 0.378276219 | 0.4   | 0.124 | 0.069555267 | 9       |
| WDR46       | 4.87E-06 | 0.286556614 | 0.314 | 0.083 | 0.076377016 | 9       |
| CIB1        | 4.92E-06 | 0.956834571 | 0.886 | 0.461 | 0.077101292 | 9       |
| QRS1        | 5.48E-06 | 0.265709673 | 0.343 | 0.094 | 0.085879838 | 9       |
| PTPN6       | 5.84E-06 | 0.838844948 | 0.6   | 0.286 | 0.091524893 | 9       |
| CD52        | 5.88E-06 | 0.39674136  | 1     | 0.996 | 0.092163508 | 9       |
| RPL18A      | 5.94E-06 | 0.283641324 | 1     | 1     | 0.093100665 | 9       |
| MPDU1       | 6.91E-06 | 0.321559884 | 0.314 | 0.086 | 0.108292926 | 9       |
| FUT8        | 6.99E-06 | 0.326522588 | 0.257 | 0.063 | 0.109645728 | 9       |
| TPM4        | 8.19E-06 | 0.384872909 | 0.486 | 0.168 | 0.128326543 | 9       |
| COPB1       | 8.88E-06 | 0.360264116 | 0.343 | 0.1   | 0.139268027 | 9       |
| FAM96A      | 9.39E-06 | 0.458817457 | 0.429 | 0.144 | 0.147153098 | 9       |
| DDAH2       | 9.66E-06 | 0.317021929 | 0.343 | 0.097 | 0.151484501 | 9       |
| UBE2A       | 1.06E-05 | 0.383849154 | 0.429 | 0.143 | 0.166511895 | 9       |
| CTSS        | 1.08E-05 | 0.503189994 | 0.686 | 0.33  | 0.168578309 | 9       |
| COPS2       | 1.11E-05 | 0.328844297 | 0.314 | 0.089 | 0.173257212 | 9       |
| GEMIN7      | 1.19E-05 | 0.342407784 | 0.371 | 0.115 | 0.186143095 | 9       |
| CDC123      | 1.23E-05 | 0.325734826 | 0.371 | 0.115 | 0.193242649 | 9       |
| UQCRH       | 1.28E-05 | 0.505231117 | 0.857 | 0.527 | 0.200096518 | 9       |
| LTB         | 1.54E-05 | 1.059066414 | 0.8   | 0.56  | 0.241663307 | 9       |
| SHMT2       | 1.84E-05 | 0.35537011  | 0.286 | 0.08  | 0.28804385  | 9       |
| RASGRP2     | 1.97E-05 | 0.559817217 | 0.6   | 0.253 | 0.309531741 | 9       |
| ATP6V0D1    | 2.00E-05 | 0.364238671 | 0.371 | 0.12  | 0.314181972 | 9       |
| ANXA2       | 2.05E-05 | 0.502614403 | 0.629 | 0.274 | 0.321725443 | 9       |
| LSM10       | 2.30E-05 | 0.388083847 | 0.514 | 0.19  | 0.360625336 | 9       |
| RIOK3       | 2.33E-05 | 0.328769881 | 0.286 | 0.08  | 0.365996002 | 9       |

Table S2 Continued

| Gene_marker | P_val       | Avg_logFC   | Pct.1 | Pct.2 | P_val_adj   | Cluster |
|-------------|-------------|-------------|-------|-------|-------------|---------|
| UPF3B       | 2.88E-05    | 0.386280117 | 0.314 | 0.093 | 0.4507689   | 9       |
| PTK2B       | 2.94E-05    | 0.323401615 | 0.371 | 0.119 | 0.460560743 | 9       |
| CHMP4B      | 3.15E-05    | 0.409471462 | 0.343 | 0.11  | 0.493184636 | 9       |
| EVI2A       | 3.33E-05    | 0.46952359  | 0.6   | 0.253 | 0.522490387 | 9       |
| SMAP2       | 3.52E-05    | 0.322908047 | 0.343 | 0.108 | 0.551927068 | 9       |
| GRN         | 3.80E-05    | 0.444772093 | 0.371 | 0.131 | 0.595804276 | 9       |
| CYBA        | 4.15E-05    | 0.349461349 | 1     | 0.926 | 0.651160258 | 9       |
| PARVG       | 4.42E-05    | 0.302493098 | 0.4   | 0.133 | 0.692473746 | 9       |
| LRMP        | 5.22E-05    | 0.269517212 | 0.257 | 0.069 | 0.817785168 | 9       |
| RPS8        | 5.40E-05    | 0.296153203 | 1     | 0.999 | 0.845827097 | 9       |
| RNASET2     | 5.81E-05    | 0.407580788 | 0.829 | 0.424 | 0.910066347 | 9       |
| ADD1        | 5.86E-05    | 0.259478738 | 0.343 | 0.107 | 0.919184147 | 9       |
| MBD4        | 6.33E-05    | 0.473508404 | 0.343 | 0.116 | 0.992908526 | 9       |
| NSA2        | 6.65E-05    | 0.4588642   | 0.571 | 0.248 | 1           | 9       |
| PTPN18      | 6.92E-05    | 0.39916202  | 0.343 | 0.112 | 1           | 9       |
| PNPLA8      | 7.12E-05    | 0.384681425 | 0.257 | 0.074 | 1           | 9       |
| HSH2D       | 7.38E-05    | 0.310771868 | 0.314 | 0.1   | 1           | 9       |
| CXXC5       | 7.61E-05    | 0.268681249 | 0.257 | 0.073 | 1           | 9       |
| ARPC3       | 8.25E-05    | 0.413431509 | 0.914 | 0.735 | 1           | 9       |
| ATP5F1      | 8.46E-05    | 0.475123161 | 0.714 | 0.336 | 1           | 9       |
| CMTM6       | 8.53E-05    | 0.354237616 | 0.514 | 0.207 | 1           | 9       |
| RALGPS2     | 8.59E-05    | 0.370386328 | 0.286 | 0.089 | 1           | 9       |
| TCEA1       | 9.01E-05    | 0.442410879 | 0.743 | 0.382 | 1           | 9       |
| PLEKHF2     | 9.67E-05    | 0.275700598 | 0.343 | 0.112 | 1           | 9       |
| PTPN1       | 0.000100762 | 0.25125528  | 0.343 | 0.112 | 1           | 9       |
| MRPL23      | 0.000101579 | 0.345307047 | 0.4   | 0.144 | 1           | 9       |
| NCF1        | 0.000103595 | 0.428606498 | 0.486 | 0.205 | 1           | 9       |
| LINC00926   | 0.000108969 | 0.372264078 | 0.257 | 0.077 | 1           | 9       |
| CSK         | 0.000110931 | 0.411702226 | 0.6   | 0.266 | 1           | 9       |
| NUDT4       | 0.000111287 | 0.329469899 | 0.257 | 0.075 | 1           | 9       |

Table S2 Continued

| Gene_marker | P_val       | Avg_logFC   | Pct.1 | Pct.2 | P_val_adj | Cluster |
|-------------|-------------|-------------|-------|-------|-----------|---------|
| SRP72       | 0.000113843 | 0.263115567 | 0.429 | 0.153 | 1         | 9       |
| AIDA        | 0.000137129 | 0.305013831 | 0.314 | 0.102 | 1         | 9       |
| ATP5A1      | 0.000137255 | 0.463574046 | 0.686 | 0.363 | 1         | 9       |
| CNDP2       | 0.00014802  | 0.250882674 | 0.4   | 0.141 | 1         | 9       |
| TMEM219     | 0.000150361 | 0.250020112 | 0.543 | 0.212 | 1         | 9       |
| UPF2        | 0.000151658 | 0.282171258 | 0.571 | 0.235 | 1         | 9       |
| ATP2A3      | 0.000191205 | 0.250032569 | 0.343 | 0.117 | 1         | 9       |
| RPL29       | 0.000200949 | 0.256494327 | 1     | 0.991 | 1         | 9       |
| ABI1        | 0.000217179 | 0.384700885 | 0.514 | 0.226 | 1         | 9       |
| FGR         | 0.000221661 | 0.492363759 | 0.457 | 0.188 | 1         | 9       |
| PPP3CA      | 0.000235104 | 0.313987653 | 0.343 | 0.119 | 1         | 9       |
| MOB1A       | 0.000242845 | 0.322845372 | 0.6   | 0.254 | 1         | 9       |
| GRB2        | 0.000243702 | 0.379699443 | 0.486 | 0.209 | 1         | 9       |
| NT5C        | 0.000244927 | 0.355771296 | 0.514 | 0.216 | 1         | 9       |
| LIMD2       | 0.000275666 | 0.352364985 | 0.943 | 0.734 | 1         | 9       |
| ST13        | 0.000325288 | 0.35453207  | 0.829 | 0.409 | 1         | 9       |
| PPM1K       | 0.00034277  | 0.417400858 | 0.429 | 0.178 | 1         | 9       |
| MMADHC      | 0.000362122 | 0.385240403 | 0.486 | 0.206 | 1         | 9       |
| PRDX1       | 0.000368173 | 0.472163544 | 0.629 | 0.33  | 1         | 9       |
| YPEL5       | 0.000378709 | 0.35279716  | 0.6   | 0.28  | 1         | 9       |
| MT-CO2      | 0.000397515 | 0.277051552 | 1     | 0.997 | 1         | 9       |
| EVI2B       | 0.000397815 | 0.503249439 | 0.771 | 0.444 | 1         | 9       |
| TMEM256     | 0.000404331 | 0.34481894  | 0.514 | 0.23  | 1         | 9       |
| LY96        | 0.000418417 | 0.37174029  | 0.286 | 0.101 | 1         | 9       |
| NACA        | 0.000422361 | 0.310204543 | 0.971 | 0.909 | 1         | 9       |
| STK38       | 0.000479426 | 0.308296952 | 0.314 | 0.115 | 1         | 9       |
| PTDSS1      | 0.000519863 | 0.330221949 | 0.257 | 0.084 | 1         | 9       |
| SLC25A6     | 0.000536597 | 0.32309577  | 0.971 | 0.84  | 1         | 9       |
| GGA2        | 0.000591785 | 0.267502705 | 0.314 | 0.113 | 1         | 9       |
| AP1M1       | 0.000596455 | 0.291644527 | 0.314 | 0.113 | 1         | 9       |

Table S2 Continued

| Gene_marker | P_val       | Avg_logFC   | Pct.1 | Pct.2 | P_val_adj | Cluster |
|-------------|-------------|-------------|-------|-------|-----------|---------|
| OLA1        | 0.000610461 | 0.284956572 | 0.286 | 0.099 | 1         | 9       |
| EEF1B2      | 0.000626952 | 0.315550954 | 0.971 | 0.801 | 1         | 9       |
| NDUFB9      | 0.000651294 | 0.367591081 | 0.771 | 0.436 | 1         | 9       |
| HMGA1       | 0.000677398 | 0.398283579 | 0.371 | 0.15  | 1         | 9       |
| NT5C3A      | 0.000693024 | 0.30648252  | 0.343 | 0.132 | 1         | 9       |
| CCT8        | 0.000695436 | 0.302572563 | 0.543 | 0.241 | 1         | 9       |
| OXA1L       | 0.000696924 | 0.273338664 | 0.457 | 0.192 | 1         | 9       |
| GDI2        | 0.000724219 | 0.495447813 | 0.686 | 0.407 | 1         | 9       |
| GLUL        | 0.000754275 | 0.281161358 | 0.286 | 0.101 | 1         | 9       |
| MRPL52      | 0.000761893 | 0.283340784 | 0.543 | 0.245 | 1         | 9       |
| JAGN1       | 0.000763913 | 0.297489909 | 0.257 | 0.088 | 1         | 9       |
| ATP5B       | 0.000774385 | 0.396356207 | 0.714 | 0.357 | 1         | 9       |
| EIF3D       | 0.000842622 | 0.424791954 | 0.686 | 0.395 | 1         | 9       |
| PFDN4       | 0.000878498 | 0.265434986 | 0.457 | 0.193 | 1         | 9       |
| ARPC1B      | 0.000885727 | 0.332566759 | 0.914 | 0.704 | 1         | 9       |
| YWHAH       | 0.000894813 | 0.331788928 | 0.429 | 0.185 | 1         | 9       |
| PABPC1      | 0.000904162 | 0.294197552 | 1     | 0.908 | 1         | 9       |
| PPP1CC      | 0.000941138 | 0.357256521 | 0.686 | 0.357 | 1         | 9       |
| DYNLL1      | 0.000955433 | 0.393826381 | 0.686 | 0.436 | 1         | 9       |
| PTP4A1      | 0.000993315 | 0.294155976 | 0.314 | 0.119 | 1         | 9       |
| MRPS15      | 0.001003921 | 0.262973015 | 0.4   | 0.161 | 1         | 9       |
| ELOVL5      | 0.001135136 | 0.265330435 | 0.429 | 0.18  | 1         | 9       |
| EPS15       | 0.001164698 | 0.303181041 | 0.371 | 0.149 | 1         | 9       |
| CAST        | 0.001164953 | 0.283110891 | 0.514 | 0.226 | 1         | 9       |
| SP100       | 0.001178403 | 0.37009103  | 0.571 | 0.274 | 1         | 9       |
| IGKV3-20    | 0.001219153 | 0.273712909 | 0.314 | 0.121 | 1         | 9       |
| CD24        | 0.001249085 | 0.466832907 | 0.314 | 0.128 | 1         | 9       |
| SHKBP1      | 0.001250338 | 0.342708185 | 0.429 | 0.192 | 1         | 9       |
| MYCBP2      | 0.00129475  | 0.374241793 | 0.371 | 0.156 | 1         | 9       |
| C1QBP       | 0.001297641 | 0.314286658 | 0.486 | 0.23  | 1         | 9       |



Table S2 Continued

| Gene_marker | P_val       | Avg_logFC   | Pct.1 | Pct.2 | P_val_adj | Cluster |
|-------------|-------------|-------------|-------|-------|-----------|---------|
| ARL5A       | 0.001400323 | 0.26753719  | 0.6   | 0.297 | 1         | 9       |
| ZFAS1       | 0.001419005 | 0.377073999 | 0.714 | 0.423 | 1         | 9       |
| MT-ND1      | 0.001584912 | 0.26237101  | 0.943 | 0.796 | 1         | 9       |
| UBXN1       | 0.001611274 | 0.324231049 | 0.771 | 0.46  | 1         | 9       |
| UCP2        | 0.001655313 | 0.410382476 | 0.771 | 0.531 | 1         | 9       |
| S1PR4       | 0.001656997 | 0.359625657 | 0.6   | 0.311 | 1         | 9       |
| LMBRD1      | 0.001684844 | 0.302088673 | 0.257 | 0.095 | 1         | 9       |
| POLD4       | 0.001891638 | 0.277885956 | 0.457 | 0.206 | 1         | 9       |
| MTMR14      | 0.001991676 | 0.347697075 | 0.257 | 0.1   | 1         | 9       |
| ECHS1       | 0.002017975 | 0.308322175 | 0.371 | 0.158 | 1         | 9       |
| ITSN2       | 0.002088547 | 0.31635367  | 0.4   | 0.176 | 1         | 9       |
| UBL7        | 0.002091011 | 0.266403202 | 0.286 | 0.11  | 1         | 9       |
| EZR         | 0.002193001 | 0.438420606 | 0.6   | 0.32  | 1         | 9       |
| TMEM134     | 0.002470961 | 0.351707131 | 0.371 | 0.165 | 1         | 9       |
| PPP2R1A     | 0.002488377 | 0.357072408 | 0.429 | 0.209 | 1         | 9       |
| PGLS        | 0.002674473 | 0.369315834 | 0.4   | 0.186 | 1         | 9       |
| HOPX        | 0.002752195 | 0.281635785 | 0.514 | 0.231 | 1         | 9       |
| UBE2D2      | 0.002763638 | 0.334363598 | 0.743 | 0.429 | 1         | 9       |
| CAPZB       | 0.002770322 | 0.348105551 | 0.771 | 0.556 | 1         | 9       |
| GLRX        | 0.003147253 | 0.308488687 | 0.429 | 0.205 | 1         | 9       |
| HN1         | 0.003177719 | 0.345250049 | 0.514 | 0.253 | 1         | 9       |
| UBE2I       | 0.003205503 | 0.360183663 | 0.657 | 0.352 | 1         | 9       |
| CLIC1       | 0.003358083 | 0.382630247 | 0.829 | 0.672 | 1         | 9       |
| CLNS1A      | 0.003383791 | 0.287776461 | 0.457 | 0.218 | 1         | 9       |
| PLP2        | 0.003504081 | 0.384717513 | 0.457 | 0.233 | 1         | 9       |
| ATP5L       | 0.003876584 | 0.251768127 | 1     | 0.851 | 1         | 9       |
| RGS2        | 0.004002401 | 0.477240672 | 0.257 | 0.107 | 1         | 9       |
| IDS         | 0.004062923 | 0.268944261 | 0.514 | 0.267 | 1         | 9       |
| STX8        | 0.004092212 | 0.254318951 | 0.314 | 0.132 | 1         | 9       |
| HSPD1       | 0.004229722 | 0.292909317 | 0.343 | 0.149 | 1         | 9       |

Table S2 Continued

| Gene_marker   | P_val       | Avg_logFC   | Pct.1 | Pct.2 | P_val_adj | Cluster |
|---------------|-------------|-------------|-------|-------|-----------|---------|
| PSMC5         | 0.004315253 | 0.268182863 | 0.543 | 0.292 | 1         | 9       |
| ARPC2         | 0.004435013 | 0.255957416 | 0.943 | 0.803 | 1         | 9       |
| ERH           | 0.004777474 | 0.278130389 | 0.686 | 0.384 | 1         | 9       |
| RP5-1171110.5 | 0.00523856  | 0.445836656 | 0.571 | 0.303 | 1         | 9       |
| TESC          | 0.005374488 | 0.252794672 | 0.257 | 0.101 | 1         | 9       |
| SCAND1        | 0.005683619 | 0.272362578 | 0.657 | 0.336 | 1         | 9       |
| ARPC5         | 0.005760634 | 0.347180054 | 0.829 | 0.519 | 1         | 9       |
| TES           | 0.005817062 | 0.254175392 | 0.343 | 0.152 | 1         | 9       |
| PYCARD        | 0.005922218 | 0.26710986  | 0.543 | 0.297 | 1         | 9       |
| SLC25A5       | 0.005932609 | 0.279862432 | 0.657 | 0.34  | 1         | 9       |
| GHITM         | 0.006164743 | 0.272170323 | 0.657 | 0.377 | 1         | 9       |
| CD53          | 0.006184047 | 0.459291812 | 0.743 | 0.61  | 1         | 9       |
| GAPDH         | 0.006199705 | 0.288076658 | 0.971 | 0.881 | 1         | 9       |
| ILK           | 0.006410951 | 0.268222281 | 0.314 | 0.138 | 1         | 9       |
| RGS19         | 0.006463511 | 0.292180379 | 0.457 | 0.233 | 1         | 9       |
| ISG20         | 0.007184007 | 0.25850704  | 0.8   | 0.54  | 1         | 9       |
| FCMR          | 0.007617984 | 0.272318768 | 0.486 | 0.251 | 1         | 9       |
| ARPC5L        | 0.008773498 | 0.285817638 | 0.543 | 0.314 | 1         | 9       |
| TBCB          | 0.009010597 | 0.345431957 | 0.6   | 0.331 | 1         | 9       |
| CCT7          | 0.009011124 | 0.262447728 | 0.371 | 0.178 | 1         | 9       |
| MTDH          | 0.009768061 | 0.331051471 | 0.6   | 0.396 | 1         | 9       |

**Table S3** Types of cell subpopulations

| Cluster | Cell type                                 | Gene                                                                                                                                                                                                                                                                                                                                                                                                                                                                                                                                                                                                                              |
|---------|-------------------------------------------|-----------------------------------------------------------------------------------------------------------------------------------------------------------------------------------------------------------------------------------------------------------------------------------------------------------------------------------------------------------------------------------------------------------------------------------------------------------------------------------------------------------------------------------------------------------------------------------------------------------------------------------|
| 0       | Type I effector CD8+ memory T (Tem) cell  | CD2/CD27/CD3D/CD3E/CD3G/CD8A/PTPRC                                                                                                                                                                                                                                                                                                                                                                                                                                                                                                                                                                                                |
| 1       | Type II effector CD8+ memory T (Tem) cell | FGFBP2/GZMB/GZMH/KLRD1                                                                                                                                                                                                                                                                                                                                                                                                                                                                                                                                                                                                            |
| 2       | Naive CD8+ T cell                         | LDHB/RPS8                                                                                                                                                                                                                                                                                                                                                                                                                                                                                                                                                                                                                         |
| 3       | Type I B cell (CCND1+ CD79A+ TNFRSF13C+)  | CD19/CD24/CD37/CD74/CD79A/CD79B/MS4A1                                                                                                                                                                                                                                                                                                                                                                                                                                                                                                                                                                                             |
| 4       | Type II B cell (CCND1+ CD79A+)            | CD74/CD79A/CD79B/MS4A1                                                                                                                                                                                                                                                                                                                                                                                                                                                                                                                                                                                                            |
| 5       | Natural killer cell                       | GNLY/GZMB/KLRB1/KLRC1/KLRD1/KLRF1/NKG7                                                                                                                                                                                                                                                                                                                                                                                                                                                                                                                                                                                            |
| 6       | Plasmacytoid dendritic cell               | CREB3L2/DERL3/FKBP2/GAS6/GNG7/HERPUD1/HSP90B1/ITM2C/LMAN1/MZB1/NPC2/NUCB2/PDIA4/SEC11C/SEL1L3/SPCS1/SSR4/TXNDC5/UBE2J1                                                                                                                                                                                                                                                                                                                                                                                                                                                                                                            |
| 7       | Type III B cell                           | CD74/MS4A1                                                                                                                                                                                                                                                                                                                                                                                                                                                                                                                                                                                                                        |
| 8       | CD1C-CD141- dendritic cell                | ABI3/AIF1/APOBEC3A/ARRB2/ASAH1/ATP1B3/BCL2A1/BID/C5AR1/CAMK1/CASP1/CD300E/CD68/CDC42EP3/CDKN1C/CFD/CLEC12A/CLEC7A/CPED1/CSF1R/CTSS/CXCL16/DOK2/DRAP1/DUSP1/DUSP6/FCGR2A/FCGR3A/FCN1/FGR/FTH1/FTL/GBP2/GPBAR1/HCK/HMOX1/HSBP1/IFI30/IFITM2/IFITM3/ITM2B/LGALS3/LILRA2/LILRA5/LILRB1/LILRB2/LRRC25/LST1/LTA4H/LYN/MS4A4A/MS4A7/MT2A/NAMPT/NAP1L1/NCF2/OAS1/PECAM1/PILRA/POU2F2/PSAP/PTPN6/RAB24/RALB/RHOC/RNF149/S100A11/S100A4/SAT1/SDCBP/SERPINA1/SIGLEC10/SLC11A1/SLC2A6/SLC31A2/SLC7A7/SOD2/STX11/STXBP2/TBXAS1/TCF7L2/TCIRG1/TESC/TIMP1/TKT/TMEM176B/TNFRSF1B/TNFSF10/TUBA1A/TYMP/TYROBP/VAMP5/VASP/VMP1/WARS/WSB1/ZEB2/ZFAND5 |
| 9       | Type IV B cell (CD79A+)                   | CD19/CD37/CD74/CD79A/CD79B/MS4A1                                                                                                                                                                                                                                                                                                                                                                                                                                                                                                                                                                                                  |

**Table S4** Routine blood index values

| Item                                     | Result | Abnormal | Units  | Reference range |
|------------------------------------------|--------|----------|--------|-----------------|
| κ light chain (kappa)                    | 6.75   | High     | g/L    | 1.7–3.7         |
| λ light chain (lambda)                   | 3.49   | High     | g/L    | 0.9–2.1         |
| Immunoglobulin G (IgG)                   | 25.6   | High     | g/L    | 7.2–16.8        |
| Immunoglobulin M (IgM)                   | 0.48   | Low      | g/L    | 0.6–2.8         |
| Immunoglobulin E (IgE)                   | 10900  | High     | kIU/L  | 0–100           |
| White blood cell/globulin ratio (A/G)    | 1      | Low      |        | 1.5–2.5         |
| Indirect bilirubin (iBil)                | 3.7    | Low      | μmol/L | 5.1–13.7        |
| Globulin (Glo)                           | 39.4   | High     | g/L    | 20.0–30.0       |
| Neutrophil percentage (Neut%)            | 33.4   | Low      | %      | 40–75           |
| Percentage of lymphocytes (lymph%)       | 60.9   | High     | %      | 20–50           |
| Red blood cell count (RBC)               | 3.14   | Low      | T/L    | 4.3–5.8         |
| Hemoglobin (Hb)                          | 93     | Low      | g/L    | 130–175         |
| Hematocrit (Hct)                         | 0.28   | Low      | L/L    | 0.40–0.50       |
| Platelet count (PLT)                     | 97     | Low      | G/L    | 125–350         |
| Platelet specific product (PCT)          | 0.1    | Low      | ml/L   | 0.11–0.28       |
| Platelet volume distribution width (PDW) | 11     | Low      | GSD    | 15.2–17.4       |

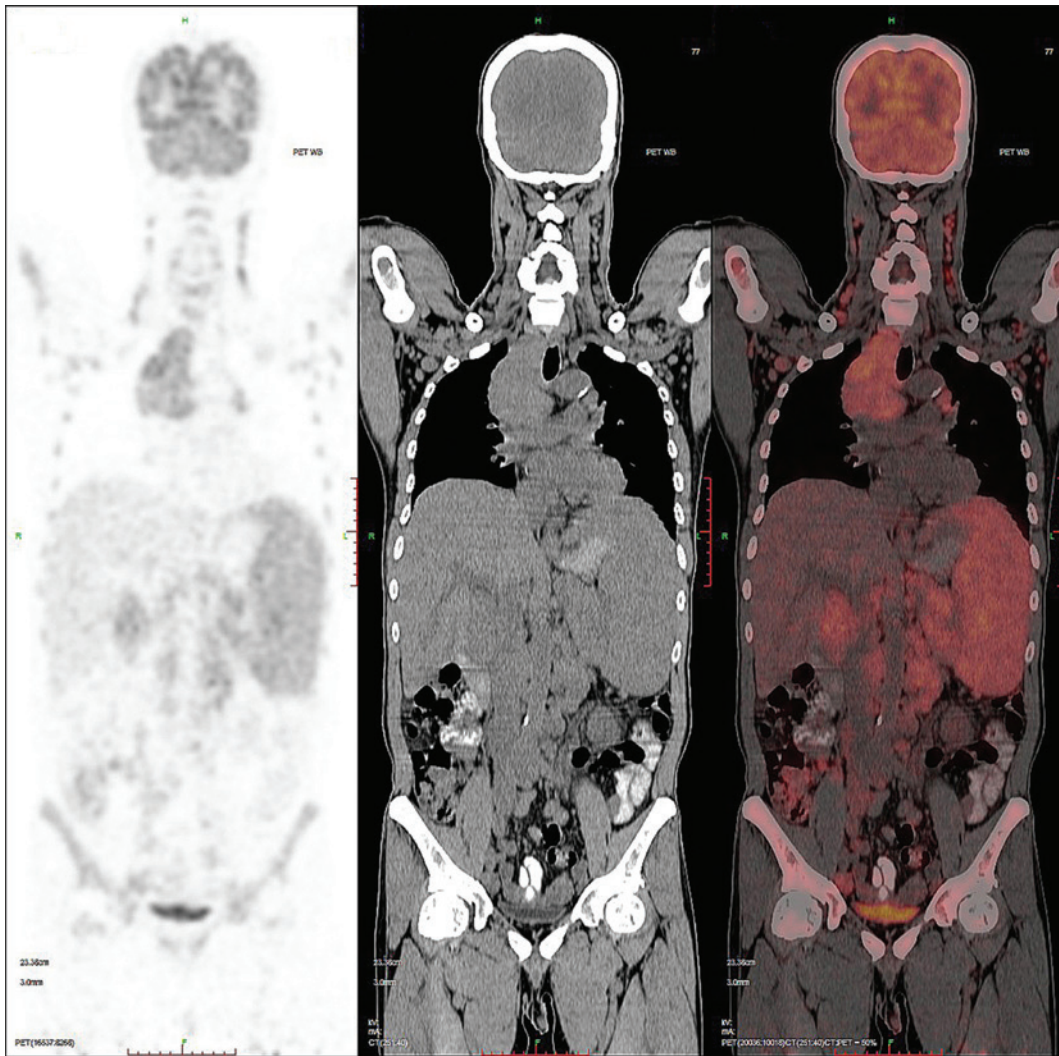

Figure S1 PET-CT of the patient in this study.

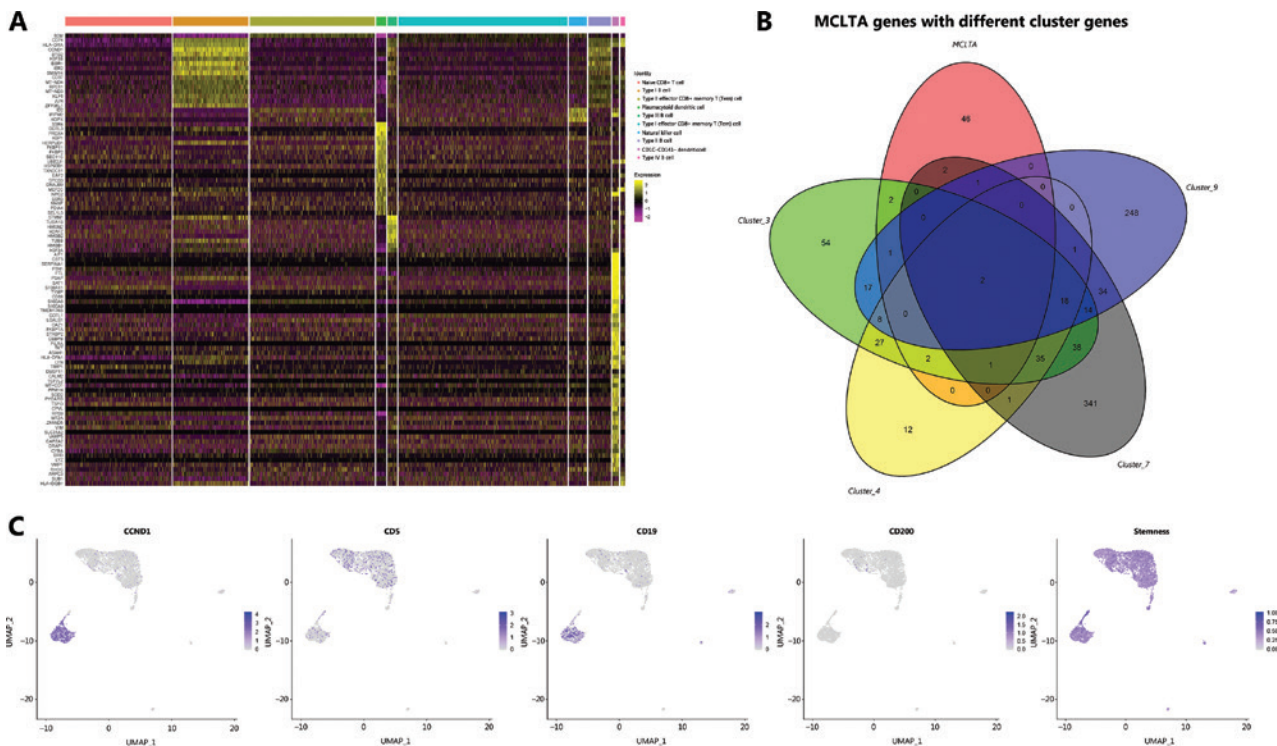

**Figure S2** Identification of malignant B cell subpopulations. (A) Gene expression heat map of stem cell related genes. (B) Venn diagram. Common genes between the MCL tumor antigen and malignant B cell clusters. (C) Cell map of malignant B cell clusters showing specific markers.

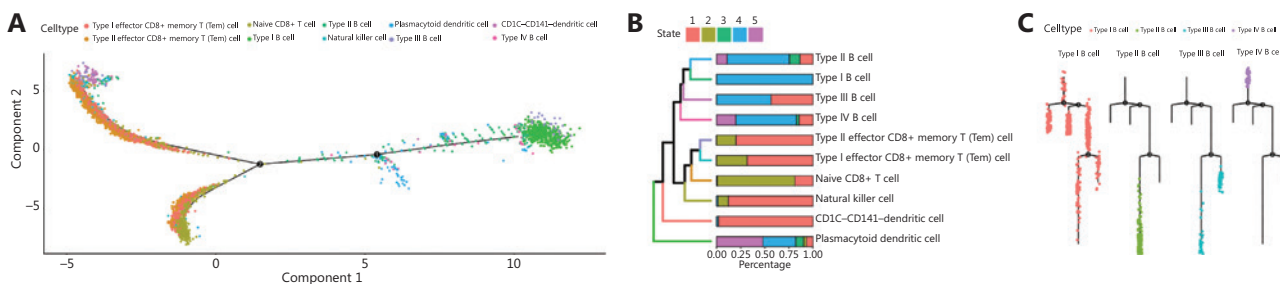

**Figure S3** Pseudotime analysis of cell subpopulations in the bone marrow of a patient with mantle cell lymphoma. (A) The state distribution of different cell clusters in MCL. Each point corresponds to a single cell, and each color represents a cell type. (B) Cell cluster hierarchical clustering. Similarity ranked from high to low. (C) Pseudotime analysis of type I-IV malignant B cells.

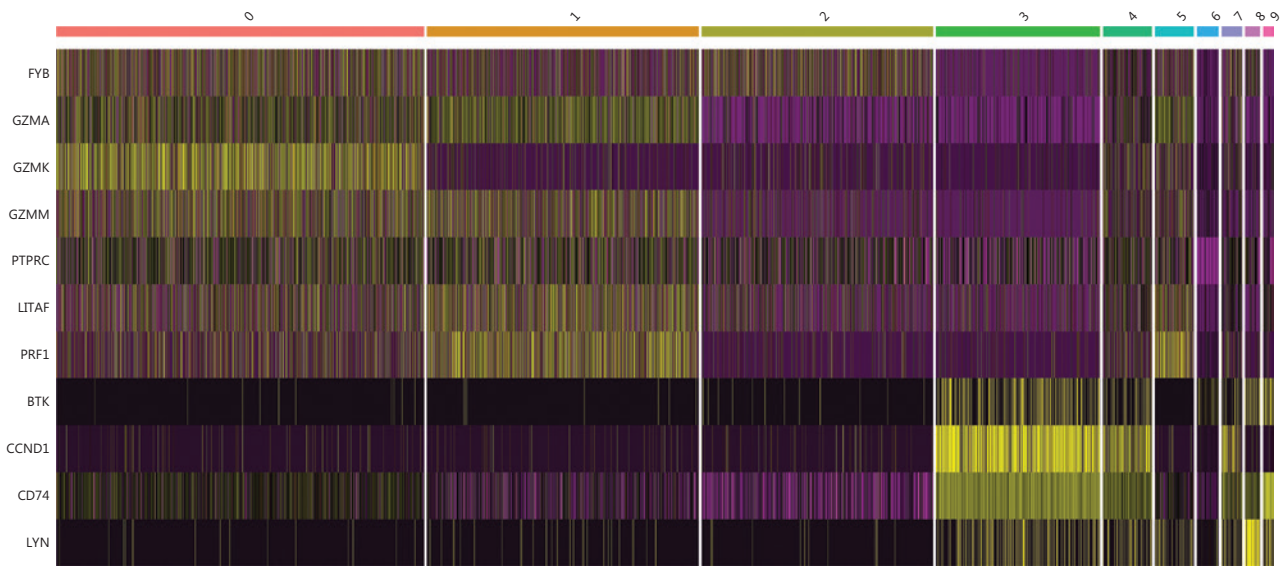

**Figure S4** Expression heatmap of genes involved in immune mechanisms. Each row represents a gene, and each column represents a single cell.

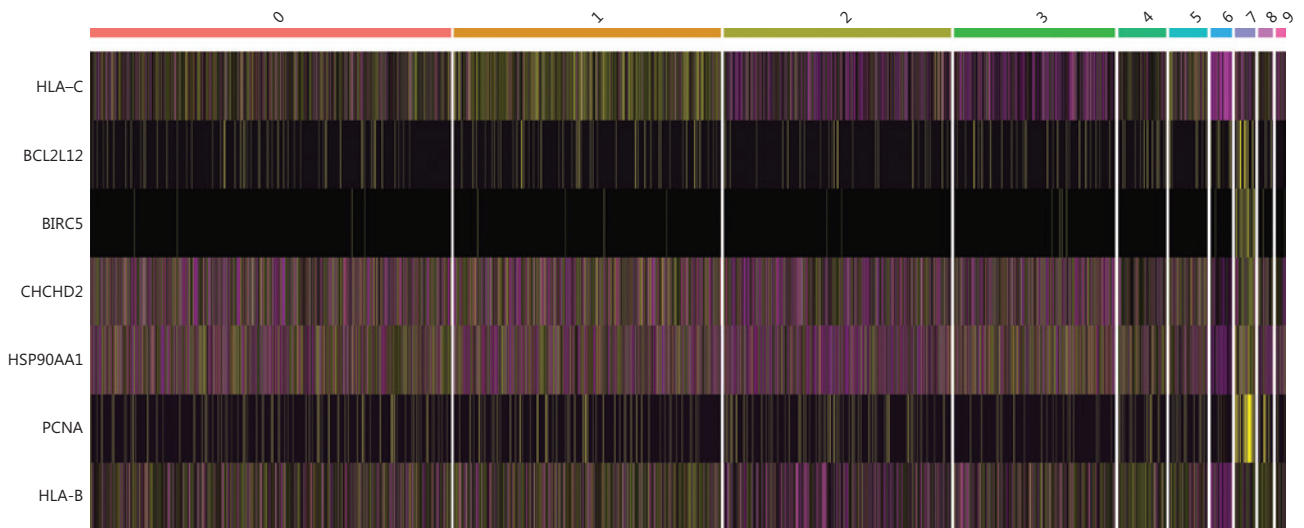

**Figure S5** Expression heatmap of genes involved in the immune escape mechanism. Each row represents a gene, and each column represents a single cell.



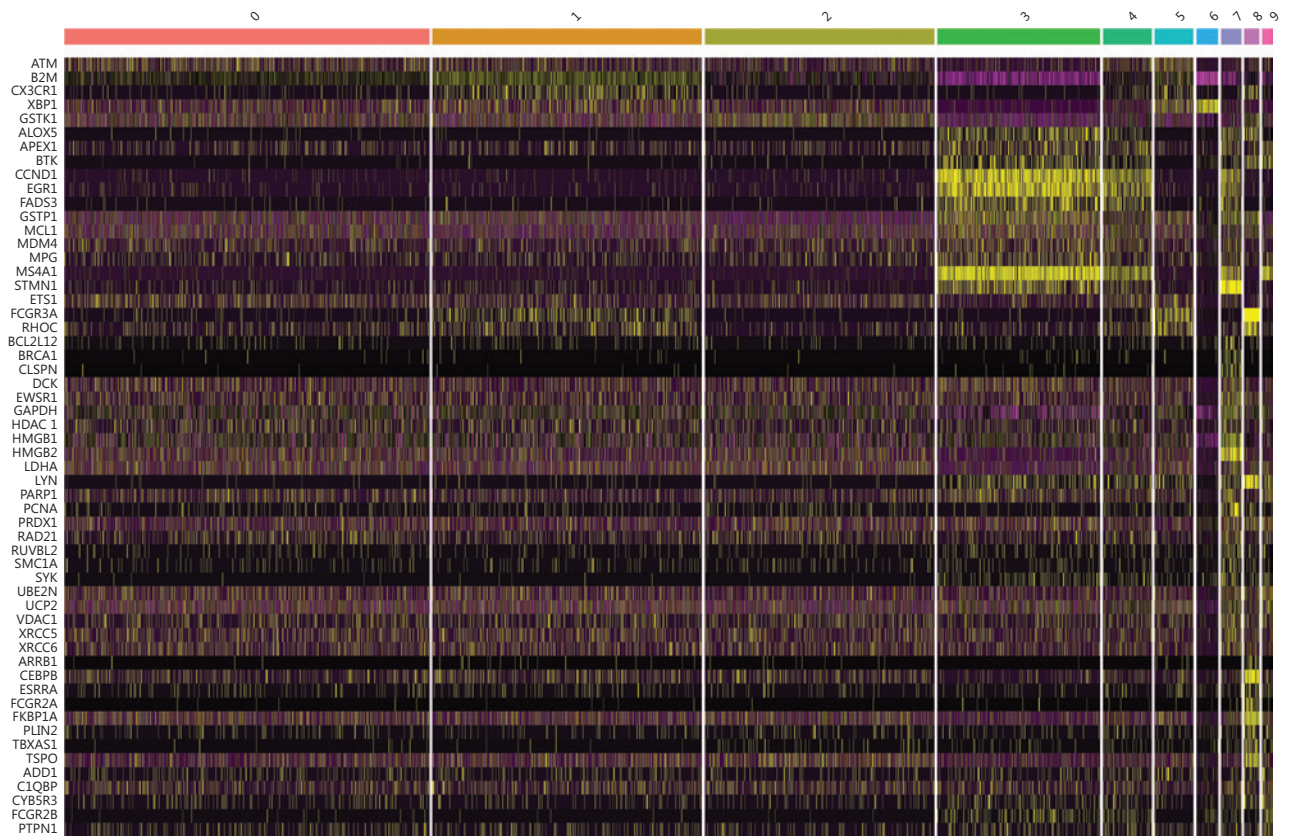

**Figure S6** Expression heatmap of genes involved in drug resistance. Each row represents a gene, and each column represents a single cell.



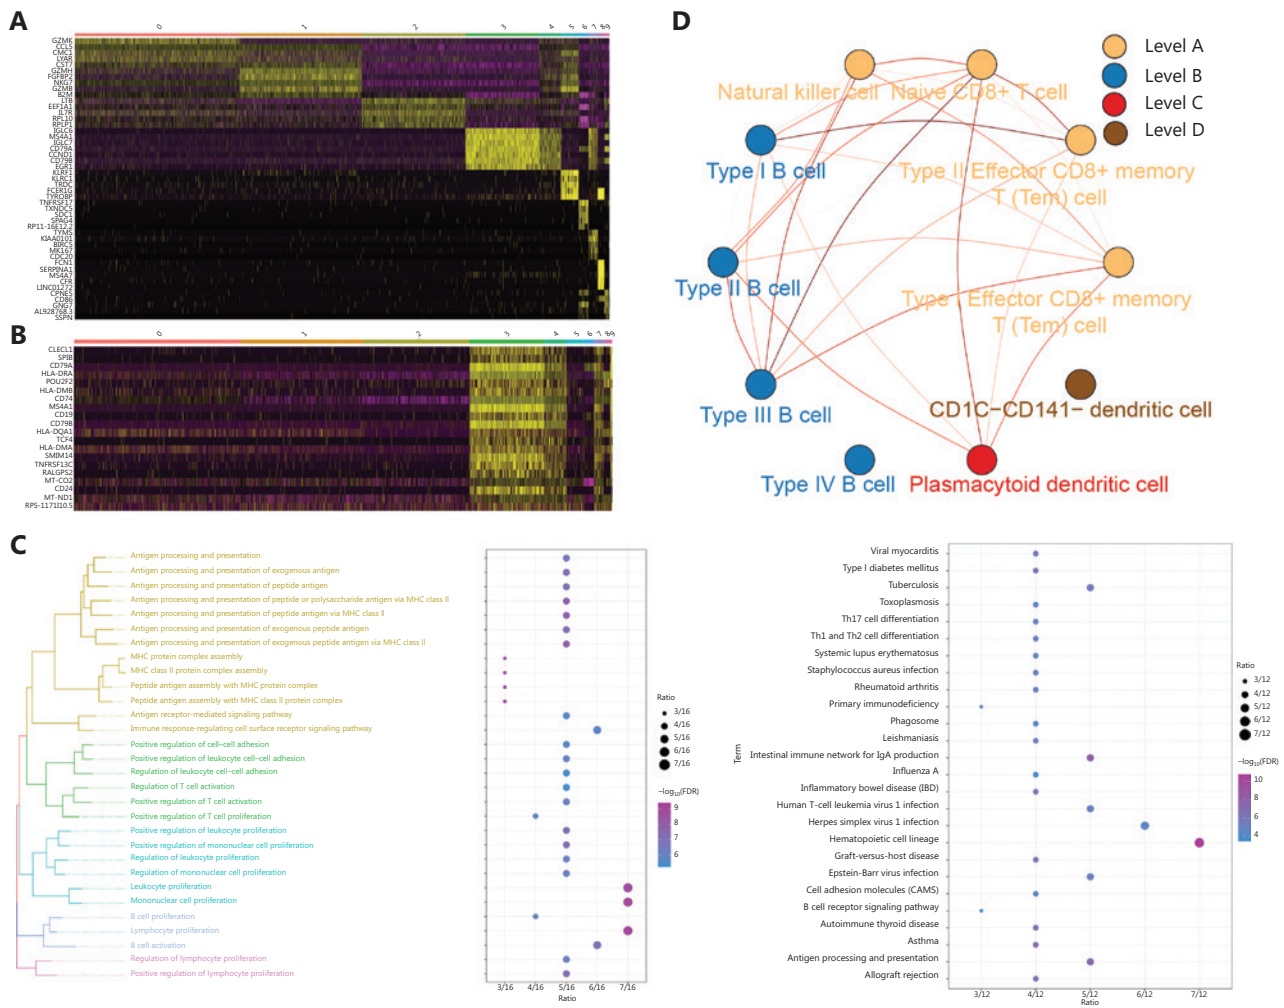

**Figure S7** Functional enrichment analysis of differentially expressed genes in malignant B cells and correlation analysis between cell subpopulations. (A) Expression heatmap of differentially expressed genes for each cell subpopulation. Each row represents a gene, and each column represents a single cell. (B) Expression heatmap of genes abnormally expressed in all malignant cells. Each row represents a gene, and each column represents a single cell. (C) Functional enrichment analysis of differentially expressed genes in four malignant B cells. The significance of enrichment gradually increased from blue to purple, and the size of the dots indicates the number of differentially expressed genes in the corresponding pathways. (D) The correlation of cell clusters. The connections indicate that different cell clusters are related to each other.

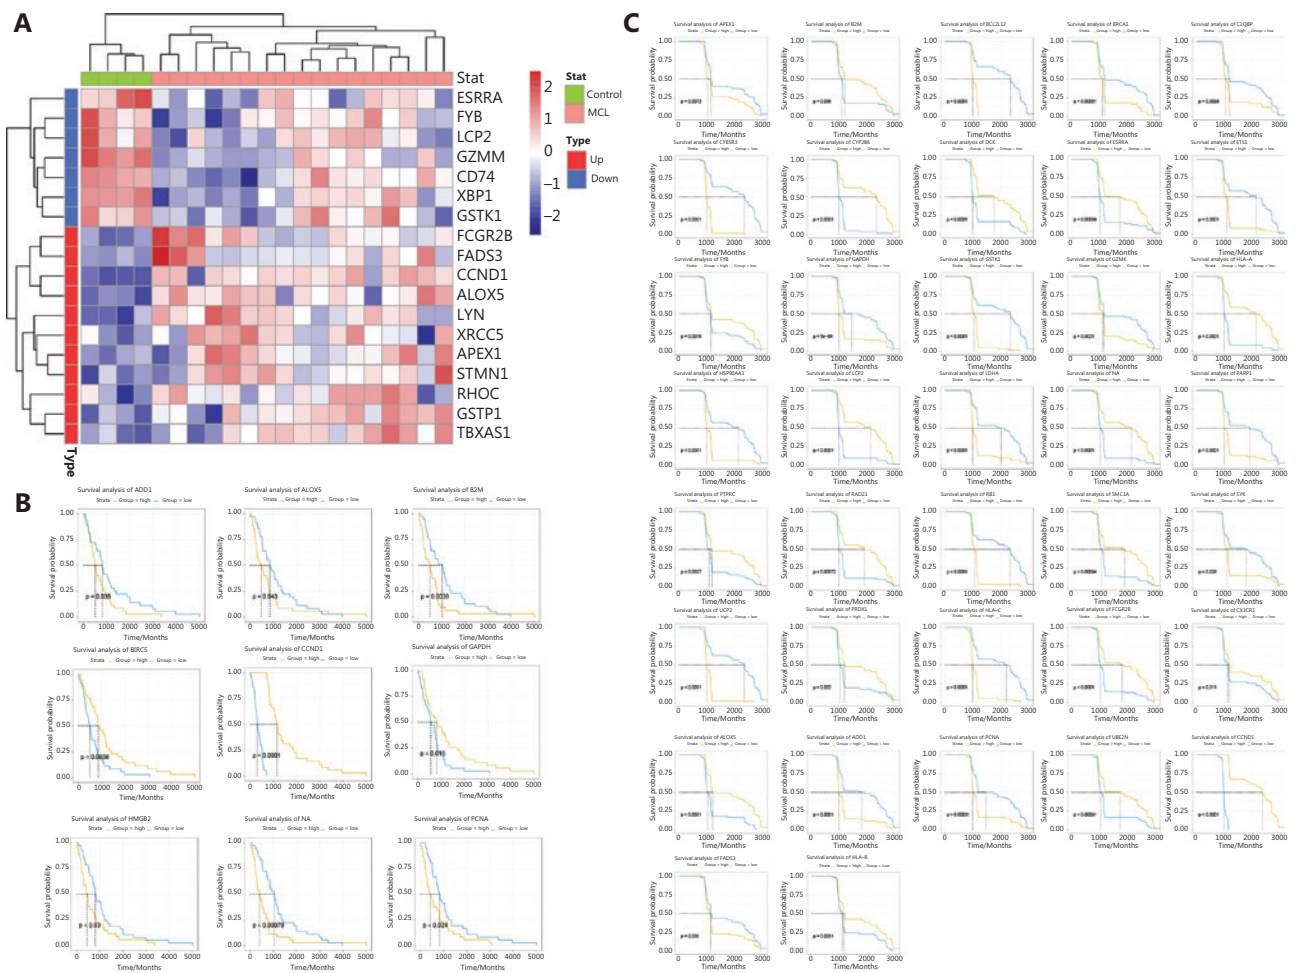

**Figure S8** The conclusions regarding expression imbalance and clinical prognostic potential for key marker genes were verified in an independent clinical cohort of patients with MCL. (A) Heatmap of common genes between mechanism genes and differentially expressed genes. (B) Prognostic potential of the key marker genes in a clinical cohort of patients with MCL in the GSE10793 dataset. (C) Prognostic potential of the key marker genes in a clinical cohort of patients with MCLs in the GSE93291 dataset.
